# Supplementary material for: The rapid construction and biological evaluation of densely substituted pyrrolo[1,2-a]indoles via a BF3·OEt2-assisted cascade approach
Source: Royal Society of Chemistry journal article supplement (doi:10.1039/d3ob01457f), 2023-01-01
Supplement: d3ob01457f1.pdf [file d3ob01457f1.pdf]

## Supporting Information

---

# A Rapid Construction and Biological Evaluation of Densely Substituted Pyrrolo[1,2-*a*]indoles via BF<sub>3</sub>·OEt<sub>2</sub> Assisted Cascade Approach

Ghanshyam Mali,<sup>a</sup> Vinay Kumar Yadav,<sup>b</sup> Himani Priya,<sup>a</sup> Manjari Shukla,<sup>b</sup> Peeyush Pandey,<sup>a</sup> Akhilesh Kumar,<sup>c</sup> Manikandan Paranjothy,<sup>\*a</sup> Sudipta Bhattacharyya,<sup>\*b</sup> and Rohan D. Erande<sup>\*a</sup>

<sup>a</sup>Department of Chemistry, Indian Institute of Technology Jodhpur, Jodhpur – 342037, India.

<sup>b</sup>Department of Bioscience & Bioengineering, Indian Institute of Technology Jodhpur, Jodhpur – 342037, India

<sup>c</sup>Department of Chemistry and Nano Science, Ewha Womans University, Seoul 03760, Korea

\*R.D.E.: Tel, (+91)-291-280-1312; Email: rd.erande@iitj.ac.in

\*S.B.: Email: sudipta@iitj.ac.in

\*M.P.: Email: Pmanikandan@iitj.ac.in

### Table of Content

|                                                                                                                            | <b>Page</b> |
|----------------------------------------------------------------------------------------------------------------------------|-------------|
| <b>1</b> General Information                                                                                               | SI-2        |
| <b>2</b> Preparation of Substrates                                                                                         | SI-3        |
| <b>3</b> General procedure for synthesis of pyrrolo[1,2- <i>a</i> ]indole ( <b>3a-3g</b> , <b>4a-4f</b> and <b>5a-5d</b> ) | SI-9        |
| <b>4</b> Characterization of compounds <b>3a-3g</b>                                                                        | SI-11       |
| <b>5</b> Characterization of compounds <b>4a-4f</b>                                                                        | SI-15       |
| <b>6</b> Characterization of compounds <b>5a-5d</b>                                                                        | SI-21       |
| <b>7</b> Controlled experiments                                                                                            | SI-24       |
| <b>8</b> Single Crystal X-Ray Analysis                                                                                     | SI-29       |
| <b>9</b> Biological Evaluation                                                                                             | SI-35       |
| <b>10</b> Computational Details                                                                                            | SI-38       |
| <i>References</i>                                                                                                          | SI-40       |
| <b>11</b> NMR spectra of new compounds <b>3a-3g</b> , <b>4a-4f</b> , <b>5a-5d</b> and <b>6-9</b>                           | SI-42       |
| <b>12</b> COMPUTATIONAL DETAILS-SUPPLEMENTARY DATA                                                                         | SI-66       |

## 1. General Information

All reactions were carried out under nitrogen atmosphere with dry solvents under anhydrous conditions, unless otherwise mentioned. All the chemicals were purchased commercially, and used without further purification. All reactions were routinely carried out in oven-dried glassware under a nitrogen or argon atmosphere unless otherwise stated. Reactions were monitored by thin-layer chromatography (TLC) carried out on 0.25 mm Merck silica gel plates (60F-254) using UV light as a visualizing agent and an *p*-anisaldehyde stain, and heat as developing agents. Merck silica gel (particle sizes 100-200 and 230-400 mesh) was used for flash column chromatography. Yields refer to chromatographically pure material, unless otherwise stated.

<sup>1</sup>H-NMR spectra were recorded at 500 MHz using a Bruker High Performance Digital FT-NMR (Model: AVANCE III HD, Ascend™ WB, 500 MHz Equipment control: Topspin 3.2 Features Standard operating procedure) whereas <sup>13</sup>C-NMR spectra were recorded at 126 MHz. Chemical shifts in the <sup>1</sup>H-NMR spectra are reported with reference to internal Me<sub>4</sub>Si (TMS) (δ 0.00) in CDCl<sub>3</sub> and DMSO-*d*<sub>6</sub>; in <sup>13</sup>C-NMR spectra they are reported with reference to TMS in CDCl<sub>3</sub>. NMR spectra were processed and analyzed using Mnova software. The HRMS data were collected using a 6545 LC/Q-TOF HRMS.

The following abbreviations were used to explain the multiplicities: s = singlet, d = doublet, t = triplet, q = quartet, dd = doublet of doublet, ddd = doublet of a doublet of a doublet, dt = doublet of a triplet, m = multiplet, br = broad.

## 2. Preparation of Substrates

### 2.1 Ethyl (*E*)-3-(3-methyl-1*H*-indol-2-yl)acrylate **1a**<sup>1</sup>

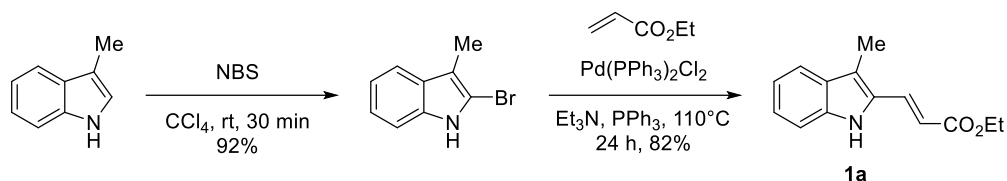

2-Bromo-3-methyl indole was synthesized according to the following modifications of literature methods<sup>2</sup>. To a solution of 3-methylindole (500 mg, 3.811 mmol) in CCl<sub>4</sub> (10 mL), NBS (*N*-bromosuccinimide; 746 mg, 4.192 mmol) was added in 200 mg portions. The mixture was stirred at room temperature for 30 min, filtered and the filtrate was concentrated under reduced pressure. The purification of the residue on a silica gel column using EtOAc/hexane (1/9) as eluent gave the 2-bromo-3-methyl indole (737 mg, 3.506 mmol, 92%) as a white solid: *R*<sub>f</sub> = 0.6 (EtOAc/hexane 1/4).

To 2-bromo-3-methylindole (737 mg, 3.506 mmol) in a 10 mL round bottom flask were added ethyl acrylate (0.47 mL, 4.382 mmol), Et<sub>3</sub>N (0.62 mL, 4.382 mmol), Ph<sub>3</sub>P (28 mg, 0.106 mmol), and Pd(PPh<sub>3</sub>)Cl<sub>2</sub> (37 mg, 0.053 mmol), and the resulting mixture was stirred at 110°C for 24 h. The reaction was allowed to room temperature and extracted 3x with EtOAc. The combined organic layer was dried over Na<sub>2</sub>SO<sub>4</sub>, filtered, and concentrated under reduced pressure. The purification of the residue on a silica gel column using (EtOAc/hexane 2/23) as eluent gave the ester **1a** (659 mg, 2.875 mmol, 82%) as a yellow solid: *R*<sub>f</sub> = 0.6 (EtOAc/hexane 1/4); The obtained NMR data agreement with the reported data.<sup>1</sup>

<sup>1</sup>H NMR (500 MHz, CDCl<sub>3</sub>) δ 8.30 (s, 1H), 7.83 (d, *J* = 16.0 Hz, 1H), 7.58 (d, *J* = 8.0 Hz, 1H), 7.32 (d, *J* = 8.1 Hz, 1H), 7.27 (dd, *J* = 9.6, 5.3 Hz, 1H), 7.12 (dd, *J* = 11.0, 3.9 Hz, 1H), 6.16 (d, *J* = 15.9 Hz, 1H), 4.30 (q, *J* = 7.1 Hz, 2H), 2.43 (s, 3H), 1.36 (t, *J* = 7.1 Hz, 3H); <sup>13</sup>C{<sup>1</sup>H} NMR (126 MHz, CDCl<sub>3</sub>) δ 167.5, 137.5, 132.4, 130.1, 129.2, 125.2, 120.0 (2 x CH), 118.9, 113.9, 111.1, 60.7, 14.5, 9.1.

### 2.2 Ethyl (*E*)-3-(3-(2-methoxy-2-oxoethyl)-1*H*-indol-2-yl)acrylate **1b**<sup>3</sup>

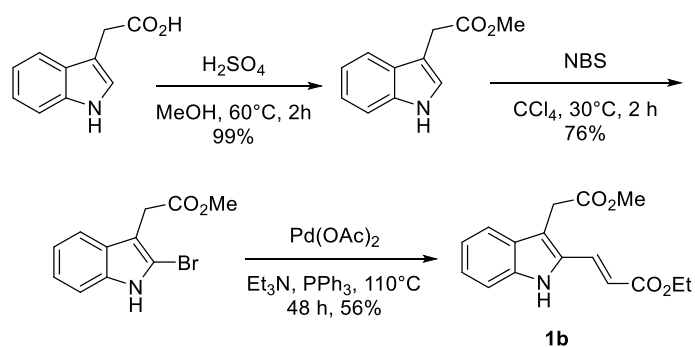

H<sub>2</sub>SO<sub>4</sub> (98%) (0.2 mL) was added to a stirred solution of Indole-3-acetic acid (500 mg, 2.854 mmol) in CH<sub>3</sub>OH (10 mL) at room temperature, and the mixture was then stirred for 2 h at 60 °C. TLC was used to monitor the reaction progress until

it was complete. A large amount of iced water was then added to the mixture. A saturated solution of  $\text{Na}_2\text{CO}_3$  was used to neutralize the mixture until a white solid appeared. After filtering the mixed solution, methyl indole-3-acetate (535 mg, 2.827 mmol, 99%) was obtained as a white solid;  $R_f = 0.6$  (EtOAc/hexane 3/7). Spectral data were in agreement with those reported.<sup>4</sup>

Methyl 2-(2-bromo-1H-indol-3-yl)acetate was synthesized according to the following modification of the literature method.<sup>5</sup> To a solution of methyl indole-3-acetate (100 mg, 0.528 mmol) in  $\text{CCl}_4$  (3 mL), NBS (104 mg, 0.584 mmol) was added portion wise. The resulting mixture was warmed to  $30^\circ\text{C}$  and stirred for 2 h, filtered and the filtrate was concentrated under reduced pressure. The purification of the residue on a silica gel column using EtOAc/hexane (2/8) as eluent gave the methyl 2-(2-bromo-1H-indol-3-yl)acetate (108 mg, 0.403 mmol, 76%) as a light-yellow solid:  $R_f = 0.7$  (EtOAc/hexane 3/7).

To methyl 2-(2-bromo-1H-indol-3-yl)acetate (100 mg, 0.373 mmol) in a 10 mL round-bottom flask were added ethyl acrylate (0.05 mL, 0.470 mmol),  $\text{Et}_3\text{N}$  (0.07 mL, 0.502 mmol),  $\text{Ph}_3\text{P}$  (28 mg, 0.106 mmol), and  $\text{Pd}(\text{OAc})_2$  (1 mg, 0.004 mmol) and the mixture was stirred at  $110^\circ\text{C}$  for 48 h. The reaction was allowed to room temperature and extracted 3x with EtOAc (5 mL). The combined organic layer was dried over  $\text{Na}_2\text{SO}_4$  and concentrated under reduced pressure. The purification of the residue on a silica gel column using EtOAc/hexane 1/4 as eluent gave the ethyl (*E*)-3-(3-(2-methoxy-2-oxoethyl)-1H-indol-2-yl)acrylate **1b** (60 mg, 0.209 mmol, 56%) as a yellow solid:  $R_f = 0.4$  (EtOAc/hexane 1/4). Spectral data were in agreement with those reported.<sup>3</sup>

### 2.3 ethyl (*E*)-3-(3-(2-acetoxyethyl)-1H-indol-2-yl)acrylate **1c**

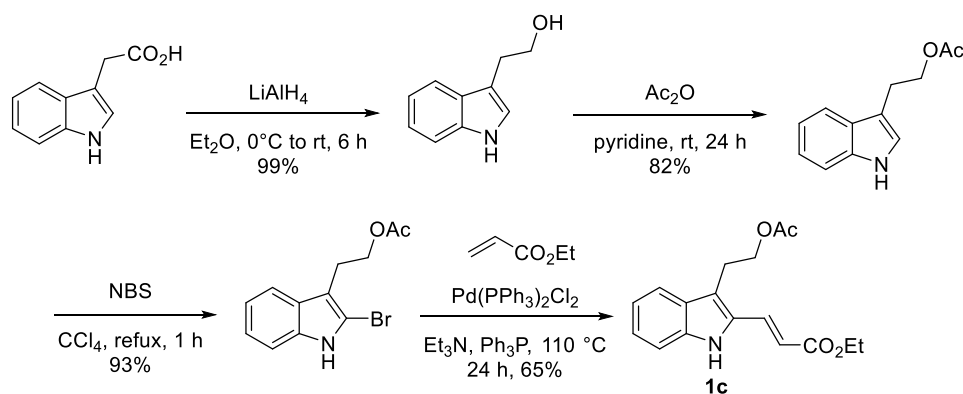

Tryptophol was synthesized according to the following modification of the literature method.<sup>6</sup> To a dried 25 mL round-bottom flask containing solution of Indole-3-acetic acid (500 mg, 2.854 mmol) in  $\text{Et}_2\text{O}$  (10 mL) and chilled in an ice bath, was added portion wise  $\text{LiAlH}_4$  (239 mg 6.298 mmol). It was allowed to stir at  $0^\circ\text{C}$  for 10 minutes. The resulting mixture was warmed to rt and stirred for 6 h. After reaction completion was confirmed by TLC, the reaction mixture was quenched by the careful addition of water at  $0^\circ\text{C}$ . The mixture was stirred for 10 minutes until a white precipitate was observed, filtered by washing the precipitate with  $\text{Et}_2\text{O}$ , and the filtrate was evaporated. The residue was purified by silica gel flash

column chromatography to afford the corresponding tryptophol (455 mg, 2.823 mmol, 99%) as a brown solid:  $R_f=0.7$  (EtOAc/hexane, 1/1). Spectral data were in agreement with those reported.<sup>7</sup>

To a solution of tryptophol (455 mg, 2.823 mmol) in pyridine (5 mL) dropwise  $\text{Ac}_2\text{O}$  (0.40 mL, 4.260 mmol) was added. The mixture was stirred at room temperature for 24h. The solution was poured into 20 mL  $\text{H}_2\text{O}$  and stirred for 20 min. The heterogeneous mixture was separated, and the aqueous layer was extracted with  $\text{CH}_2\text{Cl}_2$  (4 x 10 mL). The combined organic layers were dried over  $\text{Na}_2\text{SO}_4$ , filtered and concentrated under reduced pressure. Purification by column chromatography on silica gel using EtOAc/hexanes (1/4) for elution provided the tryptophol ester (472 mg, 2.323 mmol 82%) as a colorless oil;  $R_f=0.5$  (EtOAc/hexanes, 1/4); Spectral data were in agreement with those reported.<sup>8</sup>

To a solution of tryptophol ester (472 mg, 2.323 mmol) in  $\text{CCl}_4$  (5 mL), NBS (455 mg, 2.555 mmol) portion wise was added. The mixture was reflux for 1h, filtrated and. the filtrate was concentrated under reduced pressure. The purification of the residue on a silica gel column using EtOAc/hexane (1/9) as eluent gave the 2-bromotryptophol ester (610 mg, 2.162 mmol, 93%) as a white solid:  $R_f = 0.5$  (EtOAc/hexane 1/4).

To 2-bromotryptophol ester (610 mg, 2.162 mmol) in a 25 mL round-bottom flask, were added ethyl acrylate (0.58 mL, 5.405 mmol),  $\text{Et}_3\text{N}$  (0.60 mL, 4.324 mmol),  $\text{Ph}_3\text{P}$  (28 mg, 0.106 mmol),  $\text{Pd}(\text{PPh}_3)\text{Cl}_2$  (46 mg, 0.065 mmol) and resulting mixture was stirred at  $110^\circ\text{C}$  for 24h. The reaction was allowed to room temperature and extracted 3x with EtOAc. The combined organic layer was dried over  $\text{Na}_2\text{SO}_4$ , filtered, and concentrated under reduced pressure. The purification of the residue on a silica gel column using EtOAc/hexane 1/4 as eluent gave the ethyl (*E*)-3-(3-(2-acetoxyethyl)-1*H*-indol-2-yl)acrylate **1c** (420 mg, 1.401 mmol, 65%) as a yellow solid:  $R_f = 0.4$  (EtOAc/hexane 1/4);  $^1\text{H NMR}$  (500 MHz,  $\text{CDCl}_3$ )  $\delta$  8.68 (s, 1H), 7.81 (d,  $J = 16.0$  Hz, 1H), 7.62 (d,  $J = 8.0$  Hz, 1H), 7.33 (d,  $J = 8.2$  Hz, 1H), 7.29 – 7.24 (m, 1H), 7.11 (t,  $J = 7.5$  Hz, 1H), 6.31 – 6.21 (m, 1H), 4.29 (dt,  $J = 14.0, 7.0$  Hz, 4H), 3.21 (t,  $J = 6.9$  Hz, 2H), 2.02 (s, 3H), 1.35 (t,  $J = 7.1$  Hz, 3H);  $^{13}\text{C}\{^1\text{H}\}$  NMR (126 MHz,  $\text{CDCl}_3$ )  $\delta$  171.2, 167.2, 137.5, 132.1, 130.9, 128.5, 125.2, 120.4, 119.9, 118.4, 114.9, 111.3, 64.5, 60.8, 23.9, 21.1, 14.5; HRMS (ESI/Q-TOF)  $m/z$ :  $[\text{M}+\text{H}]^+$  Calcd for  $\text{C}_{17}\text{H}_{20}\text{NO}_4$  302.1387; Found 302.1391.

#### 2.4 ethyl (*E*)-3-(3-(2-acetamidoethyl)-1*H*-indol-2-yl)acrylate **1d**

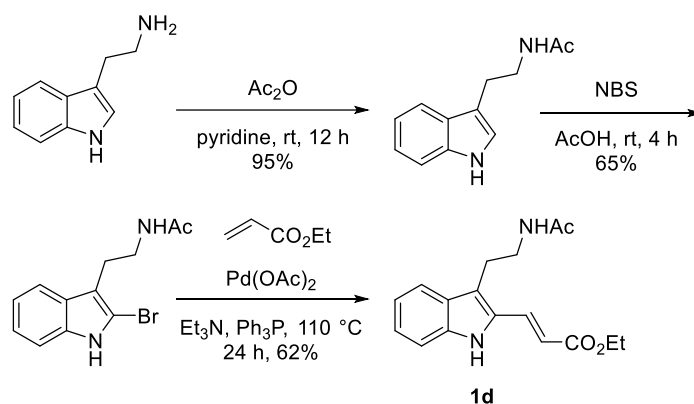

To a solution of tryptamine (200 mg, 1.248 mmol) in pyridine (5 mL) was added dropwise  $\text{Ac}_2\text{O}$  (0.18 mL, 1.872 mmol). The mixture was stirred at room temperature for 12 h. The solution was poured into 10 mL  $\text{H}_2\text{O}$  and stirred for 20 min. The heterogeneous mixture was separated and the aqueous layer was extracted with  $\text{CH}_2\text{Cl}_2$  (4 x 10 mL). The combined

organic layers were dried over  $\text{Na}_2\text{SO}_4$ , filtered and concentrated under reduced pressure. Purification by column chromatography on silica gel using EtOAc/hexanes (4/1) for elution provided the acetamide (240 mg, 1.187 mmol 95%) as a colourless oil;  $R_f=0.5$  (EtOAc/hexanes, 4/1); Spectral data were in agreement with those reported.<sup>8</sup>

To a solution of acetamide (240 mg, 1.187 mmol) in AcOH (5 mL) was added portion wise NBS (233 mg, 1.309 mmol). The mixture was stirred at room temperature for 4 h, filtrated and neutralized by aq.  $\text{NaHCO}_3$  then the filtrate was concentrated under reduced pressure. The purification of the residue on a silica gel column using EtOAc/hexane (4/1) as eluent gave the 2-bromo tryptamine (217 mg, 0.772 mmol, 65%) as a white solid:  $R_f = 0.4$  (EtOAc/hexane 4/1).

To 2-bromo tryptamine (217 mg, 0.772 mmol) in a 10 mL round bottom flask added ethyl acrylate (0.10 mL, 0.965 mmol),  $\text{Et}_3\text{N}$  (0.13 mL, 0.965 mmol),  $\text{Ph}_3\text{P}$  (13 mg, 0.049 mmol),  $\text{Pd}(\text{OAc})_2$  (6 mg, 0.027 mmol) and resulting mixture was stirred at  $110^\circ\text{C}$  for 24 h. The reaction was allowed to room temperature and extracted 3x with EtOAc. The combined organic layer was dried over  $\text{Na}_2\text{SO}_4$ , filtered and concentrated under reduced pressure. The purification of the residue on a silica gel column using (EtOAc/hexane 9/1) as eluent gave the ethyl (*E*)-3-(3-(2-acetamidoethyl)-1H-indol-2-yl)acrylate **1d** (144 mg, 0.479 mmol, 62%) as a yellow solid:  $R_f = 0.5$  (EtOAc/hexane 9/1);  $^1\text{H NMR}$  (500 MHz,  $\text{DMSO}-d_6$ )  $\delta$  11.41 (s,  $J = 29.2$  Hz, 1H), 8.03 – 7.91 (m, 1H), 7.65 – 7.60 (m, 2H), 7.56 (d,  $J = 6.0$  Hz, 1H), 7.35 – 7.00 (m, 2H), 6.54 (dd,  $J = 21.1$ , 12.2 Hz, 1H), 4.19 (q,  $J = 13.7$ , 6.8 Hz, 2H), 3.26 – 3.15 (m, 2H), 2.95 (t,  $J = 6.6$  Hz, 2H), 1.75 (d,  $J = 11.1$  Hz, 3H), 1.29 – 1.24 (t, 3H);  $^{13}\text{C}\{^1\text{H}\}$  NMR (126 MHz,  $\text{CDCl}_3$ )  $\delta$  171.0, 136.5, 127.7, 125.0, 122.4, 120.4, 120.1, 117.9, 112.5, 112.1, 110.9, 109.0, 39.8, 29.8, 24.8, 24.8, 23.2; HRMS (ESI/Q-TOF)  $m/z$ :  $[\text{M}+\text{H}]^+$  Calcd for  $\text{C}_{17}\text{H}_{21}\text{N}_2\text{O}_3$  301.1547; Found 301.1549.

## 2.5 Ethyl (*E*)-3-(3-methyl-1H-indol-2-yl)acrylate **1e**

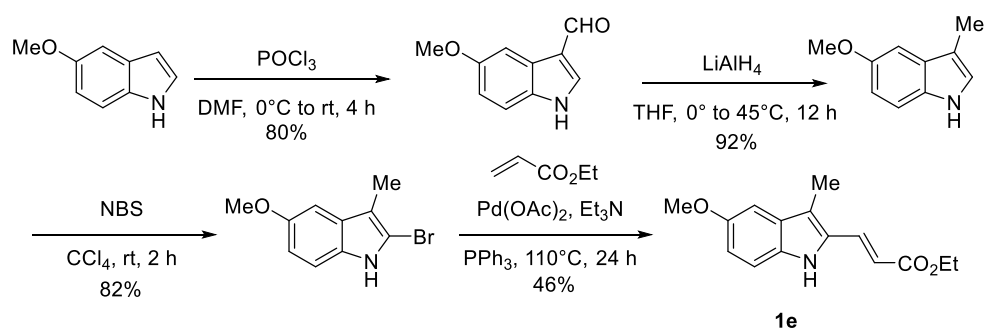

5-methoxy-indole-3-carbaldehyde was synthesized according to the following modification of literature methods<sup>9</sup>. To a dried 25 mL round bottom flask containing solution of 5-methoxy indole (200 mg, 1.359 mmol) in DMF (5 mL) and chilled in an ice bath,  $\text{POCl}_3$  (0.38 mL, 4.077 mmol) was added slowly, turning the mixture into a red solution. It was allowed to stir at  $0^\circ\text{C}$  for 30 min. The resulting mixture was warmed to rt and stirred for 3.5h, until it turned into a yellow suspension. After reaction completion confirmed by TLC, the reaction mixture was quenched by adding crushed ice in a round bottom flask containing the crude, followed by the dropwise addition of 15%  $\text{NaOH}$  (8 mL), using an ice bath. The crude was mixed with EtOAc and extracted (3 x 20 mL). The combined organic layers were washed with water (3 x 10 mL), dried over  $\text{Na}_2\text{SO}_4$ , filtered and the solvent evaporated under reduced pressure to afford 5-methoxy-indole-3-carbaldehyde (190

mg, 1.085 mmol, 80%) as a brown solid:  $R_f=0.2$  (EtOAc/hexane, 1/1). The obtained product used in next step without further purification.

To a dried 25 mL round bottom flask containing solution of 5-methoxy indole-3-carbaldehyde (190 mg, 1.085 mmol) in THF (5 mL) and chilled in an ice bath,  $\text{LiAlH}_4$  (83 mg, 2.170 mmol) was added portion wise. It was allowed to stir at  $0^\circ\text{C}$  for 15 min. The resulting mixture was warmed to  $45^\circ\text{C}$  and stirred for 12 h. After reaction completion confirmed by TLC, the reaction mixture was quenched by adding crushed ice in round bottom flask containing the crude, using an ice bath. The crude was mixed with EtOAc and extracted (3 x 10 mL). The combined organic layers were washed with water (3 x 10 mL), dried over  $\text{Na}_2\text{SO}_4$ , filtered and the solvent evaporated under reduced pressure. The crude product purified by silica gel column by using EtOAc/hexane (1/4) as eluent gave 5-methoxy-3-methyl indole (161 mg, 0.999 mmol, 92%) as a white solid:  $R_f=0.5$  (EtOAc/hexane, 1/4).

To a solution of 5-methoxy-3-methyl indole (161 mg, 0.999 mmol) in  $\text{CCl}_4$  (4 mL) was added portions wise NBS (196 mg, 1.099 mmol). The mixture was stirred at room temperature for 2h, filtered and the filtrate was concentrated under reduced pressure. The purification of the residue on a silica gel column using EtOAc/hexane (1/9) as eluent gave the 2-bromo-5-methoxy-3-methyl indole (197 mg, 0.820 mmol, 82%) as a white solid:  $R_f = 0.6$  (EtOAc/hexane 1/4).

To 2-bromo-5-methoxy-3-methylindole (197 mg, 0.820 mmol) in a 5 mL round bottom flask added ethyl acrylate (0.11 mL, 1.024 mmol),  $\text{Et}_3\text{N}$  (0.15 mL, 1.024 mmol),  $\text{Ph}_3\text{P}$  (28 mg, 0.106 mmol),  $\text{Pd}(\text{OAc})_2$  (37 mg, 0.053 mmol) and resulting mixture was stirred at  $110^\circ\text{C}$  for 24h. The reaction was allowed to room temperature and extracted 3x with EtOAc. The combined organic layer was dried over  $\text{Na}_2\text{SO}_4$ , filtered and concentrated under reduced pressure. The purification of the residue on a silica gel column using EtOAc/hexane (1/9) as eluent gave the ethyl (*E*)-3-(5-methoxy-3-methyl-1*H*-indol-2-yl)acrylate **1e** (98 mg, 0.378 mmol, 46%) as a yellow solid:  $R_f = 0.6$  (EtOAc/hexane 1/4);  **$^1\text{H}$  NMR** (500 MHz,  $\text{CDCl}_3$ )  $\delta$  8.06 (s, 1H), 7.77 (d,  $J = 16.0$  Hz, 1H), 7.52 (s, 1H), 7.30 – 7.21 (m, 1H), 6.97 (s, 1H), 6.11 (d,  $J = 16.0$  Hz, 1H), 4.28 (q,  $J = 7.1$  Hz, 2H), 3.94 (s, 3H), 2.39 (s, 3H), 1.35 (t,  $J = 7.1$  Hz, 4H);  **$^{13}\text{C}\{^1\text{H}\}$  NMR**(126 MHz,  $\text{CDCl}_3$ )  $\delta$  167.2, 150.7, 132.8, 132.1, 131.1, 129.0, 118.2, 115.7, 114.5, 111.2, 101.5, 60.7, 56.9, 14.5, 9.1; **HRMS** (ESI/Q-TOF)  $m/z$ :  $[\text{M}+\text{H}]^+$  Calcd for  $\text{C}_{15}\text{H}_{18}\text{NO}_3$  260.1281; Found 260.1289.

## 2.6 (*E*)-3-(3-methyl-1*H*-indol-2-yl)acrylonitrile **1f**

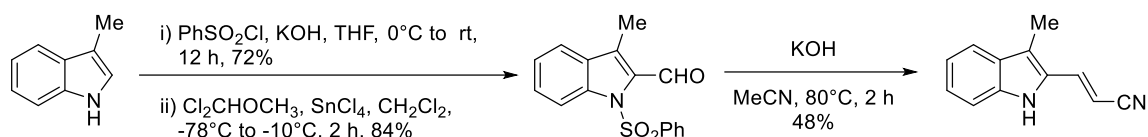

Indole-2-carbaldehyde was synthesized according to the following modification of literature method.<sup>1</sup>

To a magnetically stirred solution of the 3-methyl indole (500 mg, 3.811 mmol) in THF (15 mL) was added  $\text{KOH}$  powder (321 mg, 5.720 mmol) followed by dropwise addition of  $\text{PhSO}_2\text{Cl}$  (0.60 mL, 4.700 mmol) at  $0^\circ\text{C}$ , and the mixture was stirred magnetically for 12h at room temperature. Water (10 mL) was then added to the reaction mixture, which was then extracted with EtOAc (3x10 mL), washed with brine (10 mL), and dried over  $\text{Na}_2\text{SO}_4$ . Evaporation of the solvent and

purification of the residue on silica gel column using (EtOAc/hexane 1/4) as eluent furnished 3-methyl-1-(phenylsulfonyl)-1*H*-indole (742 mg, 2.735, 72%) as a white solid:  $R_f = 0.5$  (EtOAc/hexane 1/4).

To a magnetically stirred solution of the protected 3-methyl indole (500 mg, 1.843 mmol) in  $\text{CH}_2\text{Cl}_2$  (10 mL) was added dichloromethyl methyl ether (0.60 mL, 6.634 mmol) followed by dropwise addition of  $\text{SnCl}_4$  (0.43 mL, 2.765 mmol) at  $-78^\circ\text{C}$ ; the mixture was then warmed slowly to  $-10^\circ\text{C}$  over a period of 2 h.  $\text{HCl}$  (1.0 N, 10 mL) was added to the reaction mixture, which was then extracted with  $\text{CH}_2\text{Cl}_2$ . The organic layer was then washed with brine and dried over  $\text{Na}_2\text{SO}_4$ . Evaporation of the solvent and recrystallization of the crude product from  $\text{CH}_2\text{Cl}_2$  furnished the Indole-2-carbaldehyde (466 mg, 1.556 mmol, 84%) as black solid:  $R_f = 0.5$  (EtOAc/hexane 3/7);

To a magnetically stirred solution of the protected indole-2-carbaldehyde (200 mg, 0.668 mmol) in acetonitrile (5 mL) was added  $\text{KOH}$  powder (75 mg, 1.337 mmol) at rt, and the mixture was stirred magnetically for 2 h at  $80^\circ\text{C}$ . Water (5 mL) was then added to the reaction mixture, which was then extracted with EtOAc ( $3 \times 10$  mL), washed with brine (10 mL), and dried over  $\text{Na}_2\text{SO}_4$ . Evaporation of the solvent and purification of the residue on silica gel column using (EtOAc/hexane 1/9) as eluent furnished (*E*)-3-(3-methyl-1*H*-indol-2-yl)acrylonitrile (59 mg, 0.322 mmol, 48%) as a white solid:  $R_f = 0.5$  (EtOAc/hexane 1/9);  $^1\text{H NMR}$  (500 MHz,  $\text{CDCl}_3$ )  $\delta$  8.00 (s, 1H), 7.59 (d,  $J = 8.0$  Hz, 1H), 7.50 (d,  $J = 16.5$  Hz, 1H), 7.34 – 7.28 (m, 2H), 7.14 (ddd,  $J = 8.0, 5.9, 2.1$  Hz, 1H), 5.47 (d,  $J = 16.5$  Hz, 1H), 2.41 (s, 3H);  $^{13}\text{C}\{^1\text{H}\}$  NMR (101 MHz,  $\text{CDCl}_3$ )  $\delta$  137.8, 129.4, 129.0, 126.1, 125.8, 120.6, 120.4, 119.0, 111.3, 100.1, 90.9, 9.1; HRMS (ESI/Q-TOF)  $m/z$ :  $[\text{M}+\text{H}]^+$  Calcd for  $\text{C}_{12}\text{H}_{10}\text{N}_2$  183.0917; Found 260.0944.

## 2.7 Cinnamate

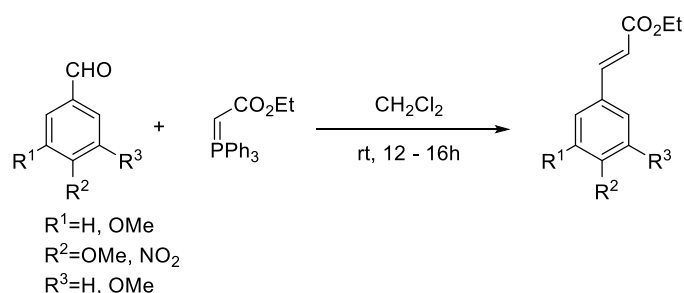

Cinnamate **2e-2g** and **8'** was prepared following a previously reported methodology.<sup>10</sup> Ethyl (triphenylphosphoranylidene)acetate (1.5 equiv.) was added to a stirring mixture of the corresponding benzaldehyde (1.0 equiv.) in dichloromethane (5-10 mL) and the resulting solution was stirred at room temperature for 12-16 h. Water (5 mL) was then added to the reaction mixture, which was then extracted with EtOAc ( $3 \times 10$  mL) and, dried over  $\text{Na}_2\text{SO}_4$ . Evaporation of the solvent and purification of the residue on silica gel column using EtOAc/hexane (1/4) as eluent furnished cinnamate **2e-2g** and **8'** as a solid.



### 3. General procedure for synthesis of pyrrolo[1,2-*a*]indole (3a-3g, 4a-4f and 5a-5d)

#### 3.1 General procedure A

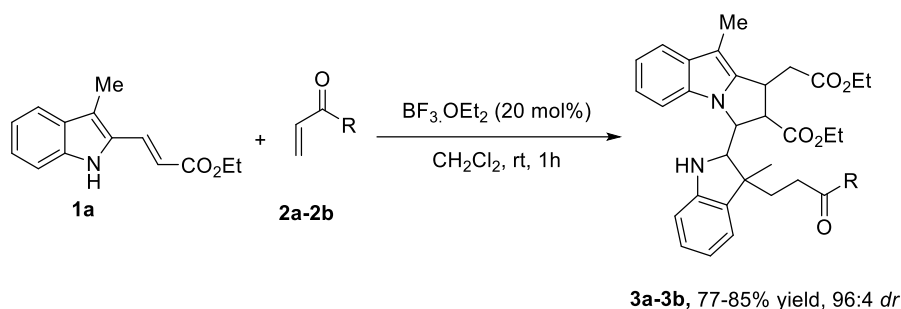

Under nitrogen atmosphere, an oven dried 10 mL round bottom flask, equipped with a magnetic stirring bar, was charged with compound ethyl (*E*)-3-(3-methyl-1*H*-indol-2-yl)acrylate **1a** (1.0 equiv.) and CH<sub>2</sub>Cl<sub>2</sub>(0.6 mL). To this solution was added dropwise BF<sub>3</sub>·OEt<sub>2</sub> (20 mol%) followed by addition of compound **2a** or **2b** (2.0 equiv.) at room temperature. Then the whole reaction mixture was allowed to stir for 1h at room temperature. After completion of the reaction (monitored by TLC), water (1 mL) was added to the reaction mixture, which was then extracted with CH<sub>2</sub>Cl<sub>2</sub> (3×10 mL) and, dried over Na<sub>2</sub>SO<sub>4</sub>. Evaporation of the solvent and purification of the residue on silica gel column using EtOAc/hexane (3/7) as eluent furnished compound **3a** and **3b** with 85% and 77% respectively.

#### 3.2 General procedure B

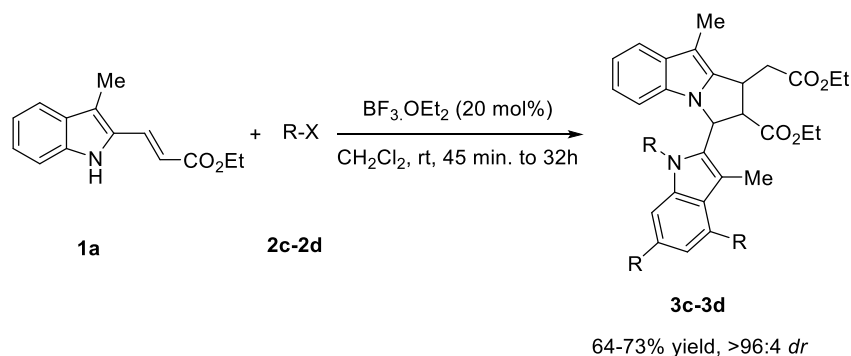

Under nitrogen atmosphere, an oven dried 10 mL round bottom flask, equipped with a magnetic stirring bar, was charged with compound ethyl (*E*)-3-(3-methyl-1*H*-indol-2-yl)acrylate **1a** (1.0 equiv.) and CH<sub>2</sub>Cl<sub>2</sub>(0.6 mL). To this solution was added dropwise BF<sub>3</sub>·OEt<sub>2</sub> (20 mol%) followed by addition of compound **2c** or **2d** (1.0 equiv.) at room temperature. Then the whole reaction mixture was allowed to stir for 45 minutes to 32h at room temperature. After completion of the reaction (monitored by TLC), water (1 mL) was added to the reaction mixture, which was then extracted with CH<sub>2</sub>Cl<sub>2</sub> (3×10 mL) and, dried over Na<sub>2</sub>SO<sub>4</sub>. Evaporation of the solvent and purification of the residue on silica gel column using EtOAc/hexane as eluent furnished compound **3c-3d** (64-73%) as a solid.

### 3.3 General procedure C

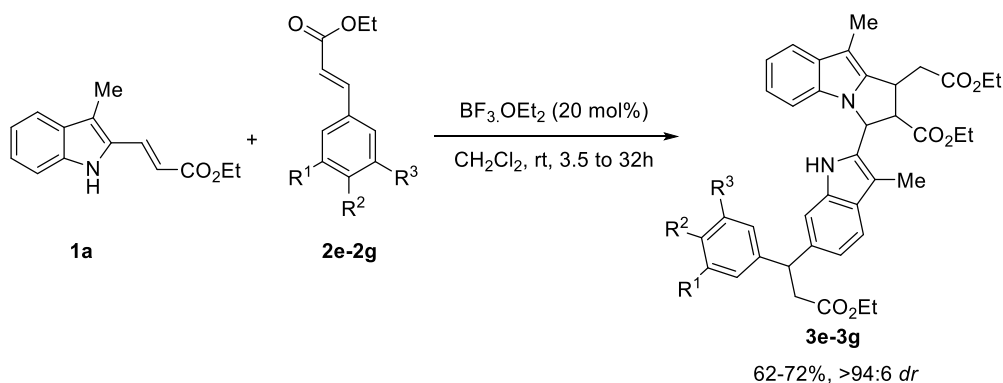

Under nitrogen atmosphere, an oven dried 10 mL round bottom flask, equipped with a magnetic stirring bar, was charged with compound ethyl (*E*)-3-(3-methyl-1*H*-indol-2-yl)acrylate **1a** (1.0 equiv.) and CH<sub>2</sub>Cl<sub>2</sub> (1.5 mL). To this solution was added dropwise BF<sub>3</sub>·OEt<sub>2</sub> (20 mol%) followed by addition of compound cinnamates **2e** or **2f** or **2g** (2.0 equiv.) at room temperature. Then the whole reaction mixture was allowed to stir for 3.5-32h at room temperature. After completion of the reaction (monitored by TLC), water (1 mL) was added to the reaction mixture, which was then extracted with CH<sub>2</sub>Cl<sub>2</sub> (3×10 mL) and, dried over Na<sub>2</sub>SO<sub>4</sub>. Evaporation of the solvent and purification of the residue on silica gel column using EtOAc/hexane as eluent furnished compound **3e-3g** (62-72%) as a solid.

### 3.4 General procedure D

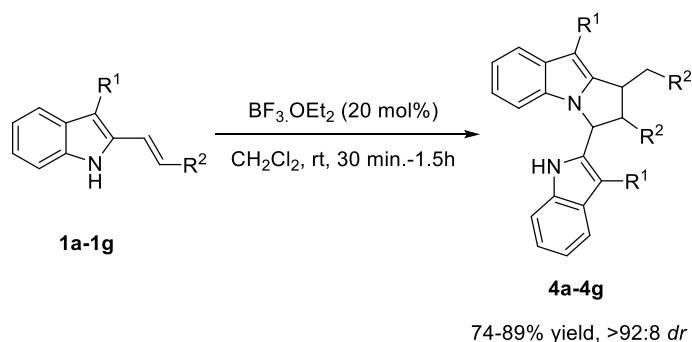

Under nitrogen atmosphere, an oven dried 10 mL round bottom flask, equipped with a magnetic stirring bar, was charged with compound (1.0 equiv.) and CH<sub>2</sub>Cl<sub>2</sub> (0.6 mL). To this solution was added BF<sub>3</sub>·OEt<sub>2</sub> (20 mol%) dropwise at room temperature, then stirring for 30 min to 1.5 h at room temperature. Water (5 mL) was then added to the reaction mixture, which was then extracted with CH<sub>2</sub>Cl<sub>2</sub> (3×10 mL) and, dried over Na<sub>2</sub>SO<sub>4</sub>. Evaporation of the solvent and purification of the residue on silica gel column using EtOAc/hexane (1/4) as eluent furnished self-dimer **4a-4g** (74-89%) as a yellow solid.

### 3.5 General procedure E

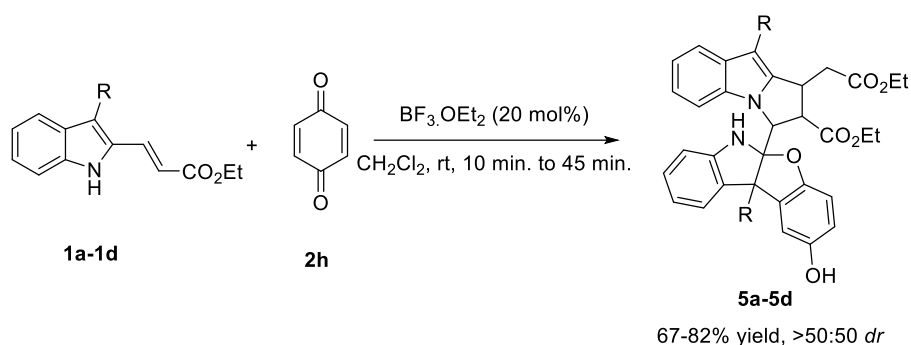

Under nitrogen atmosphere, an oven dried 10 mL round bottom flask, equipped with a magnetic stirring bar, was charged with compound **1a-1d** (1.0 equiv.) and CH<sub>2</sub>Cl<sub>2</sub> (0.6 mL). To this solution was added dropwise BF<sub>3</sub>·OEt<sub>2</sub> (20 mol%) followed by addition of 1,4-benzoquinone **2h** (1.5 equiv.) at room temperature. Then the whole reaction mixture was allowed to stir for 10-45 min. at room temperature. After completion of the reaction (monitored by TLC), water (1 mL) was added to the reaction mixture, which was then extracted with CH<sub>2</sub>Cl<sub>2</sub> (3×10 mL) and, dried over Na<sub>2</sub>SO<sub>4</sub>. Evaporation of the solvent and purification of the residue on silica gel column using EtOAc/hexane as eluent furnished compound **5a-5d** (67-82%) as a solid.

### 4. Characterization of compounds 3a-3g

#### Synthesis of pyrrolo[1,2-*a*]indole **3a**:

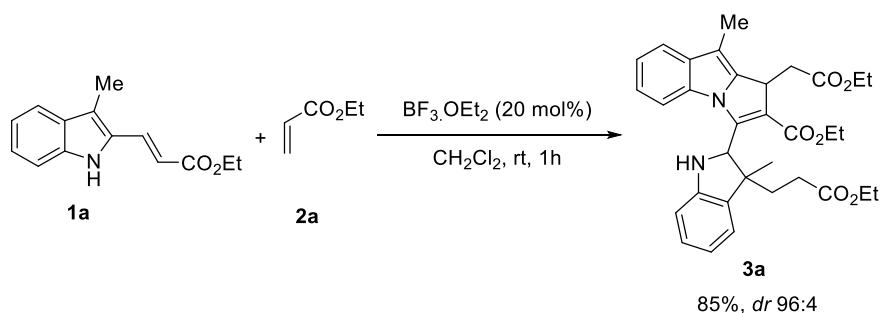

The title compound **3a** was prepared from ethyl (*E*)-3-(3-methyl-1*H*-indol-2-yl)acrylate **1a** (10 mg 0.044 mmol, 1.0 equiv.), BF<sub>3</sub>·OEt<sub>2</sub> (20 mol%) and ethyl acrylate **2a** (9.4 μL, 0.088 mmol, 2.0 equiv.) according to general procedure **A** with a reaction time of 1h. The crude residue was purified by column chromatography on silica gel with an eluent of hexanes to EtOAc/hexanes (3/7) to furnish the title compound **3a** (11 mg 0.019 mmol, 85%) as a white solid; *R*<sub>f</sub>=0.4 (EtOAc/hexane 3/7); m.p. 242°C; **IR** (neat):  $\nu_{\text{max}}/\text{cm}^{-1}$  3020, 2362, 1731, (C=O), 1215, 742, 667; **<sup>1</sup>H NMR** (500 MHz, CDCl<sub>3</sub>)  $\delta$  9.34 (s, 1H), 7.52 (d, *J* = 7.8 Hz, 1H), 7.29 (d, *J* = 8.0 Hz, 1H), 7.13 (d, *J* = 7.6 Hz, 1H), 7.05 (d, *J* = 7.3 Hz, 1H), 6.91 (dd, *J* = 14.8, 7.4 Hz, 2H), 6.67 (t, *J* = 7.4 Hz, 1H), 6.26 (d, *J* = 7.8 Hz, 1H), 5.60 (d, *J* = 4.5 Hz, 1H), 4.26 – 4.20 (m, 4H), 4.06 – 4.02 (m, 3H), 3.50 (d, *J* = 17.9 Hz, 1H), 3.37 (d, *J* = 17.9 Hz, 1H), 2.47 (s, 3H), 2.31 – 2.23 (m, 1H), 2.19 – 2.11 (m, 2H), 1.96 – 1.84 (m, 1H), 1.52 (s, 3H), 1.34 – 1.25 (m, 6H), 1.19 (t, *J* = 7.1 Hz, 3H); **<sup>13</sup>C{<sup>1</sup>H} NMR** (126 MHz, CDCl<sub>3</sub>)  $\delta$  173.7, 173.1, 171.9, 156.4, 143.8, 138.1, 136.3, 131.3, 128.4, 128.2, 122.3, 122.2, 119.4, 119.0, 118.9, 111.2, 109.9, 107.5, 95.2, 61.5, 61.4, 61.1, 60.5, 55.81, 44.5, 35.2, 31.0, 30.4, 26.6, 14.4, 14.3, 14.3, 9.1; **HRMS** (ESI/Q-TOF) *m/z*: [M-H]<sup>+</sup> Calcd for C<sub>33</sub>H<sub>37</sub>N<sub>2</sub>O<sub>6</sub> 527.2652; Found 527.2680.

## Synthesis of pyrrolo[1,2-*a*]indole **3b**

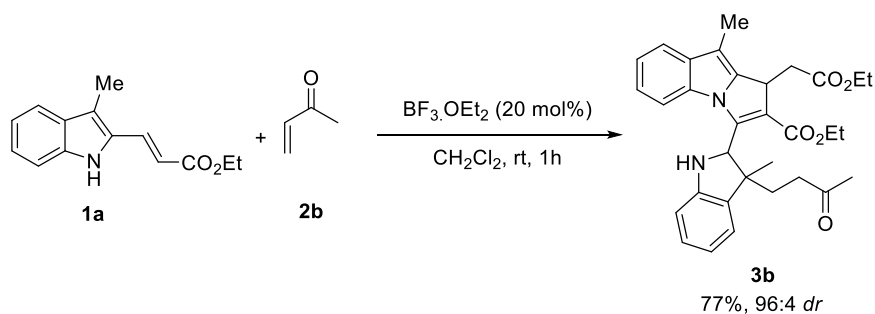

The title compound **3b** was prepared from ethyl (*E*)-3-(3-methyl-1*H*-indol-2-yl)acrylate **1a** (10 mg 0.044 mmol, 1.0 equiv.),  $\text{BF}_3 \cdot \text{OEt}_2$  (20 mol%) and methyl vinyl ketone **2b** (7.4  $\mu\text{L}$ , 0.088 mmol, 2.0 equiv.) according to general procedure **A** with a reaction time of 1h. The crude residue was purified by column chromatography on silica gel with an eluent of hexanes to EtOAc/hexanes (1/4) to furnish the title compound **3b** (9 mg 0.017 mmol, 77%) as a white solid;  $R_f=0.4$  (EtOAc/hexane 1/4); m.p. 240°C;  $^1\text{H NMR}$  (500 MHz,  $\text{CDCl}_3$ )  $\delta$  9.34 (s, 1H), 7.52 (d,  $J = 6.2$  Hz, 1H), 7.36 (s, 1H), 7.10 (d,  $J = 37.5$  Hz, 2H), 6.90 (d,  $J = 8.3$  Hz, 2H), 6.67 (s, 1H), 6.29 (s, 1H), 5.63 (d,  $J = 4.5$  Hz,  $\text{CH}^a$ ), 4.22 (s, 4H), 4.02 (d,  $J = 4.5$  Hz,  $\text{CH}^b$ ), 3.46 (d,  $J = 17.9$  Hz,  $\text{CH}^c$ ), 3.33 (d,  $J = 18.0$  Hz,  $\text{CH}^c$ ), 2.48 (s, 3H), 2.35 (d,  $J = 10.7$  Hz, 1H), 2.16 (d,  $J = 12.7$  Hz, 1H), 2.03 (d, 5H), 1.50 (s, 3H), 1.29 (s, 6H);  $^{13}\text{C}\{^1\text{H}\}$  NMR (126 MHz,  $\text{CDCl}_3$ )  $\delta$  208.8, 173.2, 171.9, 156.6, 143.8, 138.4, 136.4, 131.3, 128.4, 128.2, 122.3, 122.2, 119.4, 119.0, 118.9, 111.2, 109.9, 107.5, 95.2, 61.5, 61.4, 61.0, 55.7, 44.4, 39.5, 33.8, 31.0, 30.20, 26.8, 14.4, 14.4, 9.0; **HRMS** (ESI/Q-TOF)  $m/z$ :  $[\text{M}-\text{H}]^+$  Calcd for  $\text{C}_{32}\text{H}_{35}\text{N}_2\text{O}_5$  527.2446; Found 527.2552.  $^1\text{H NMR}$  (500 MHz,  $\text{CDCl}_3$ )

The examination of the chemical shift value and comparison of **4a** and **3b** was used to pinpoint the location of the double bond in a five-member ring. Additionally, determined structure supported by the 2D NMR ( $^1\text{H}-^1\text{H}$  COSY and  $^1\text{H}-^1\text{H}$  NOESY).

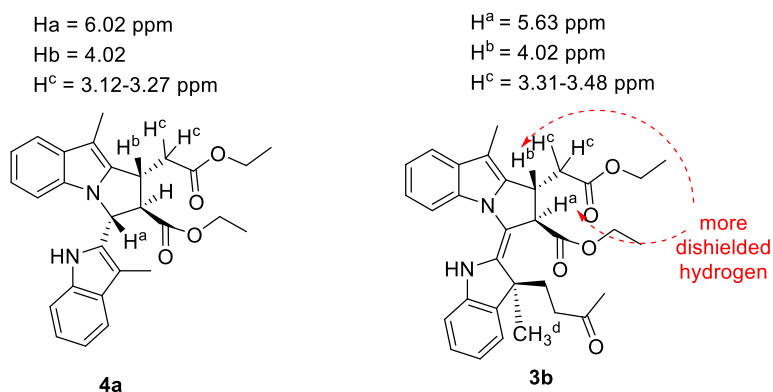

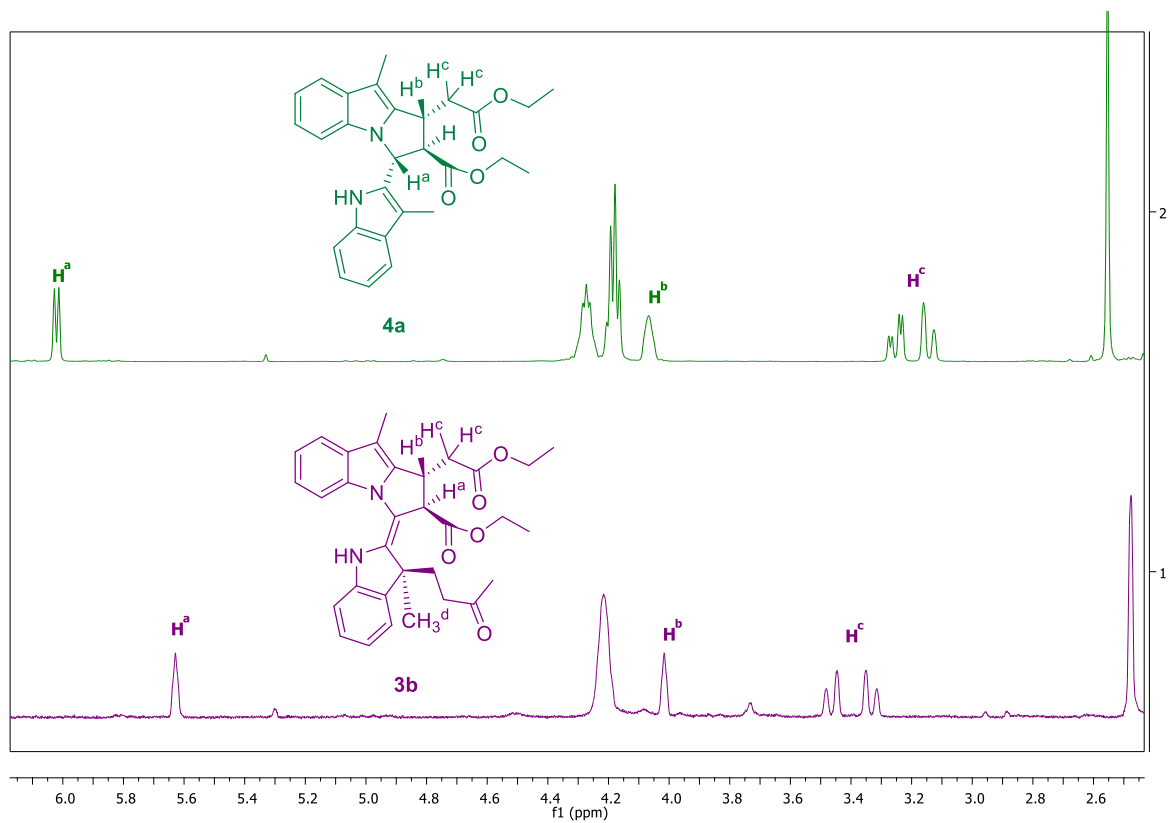

$^1\text{H}$ - $^1\text{H}$  COSY NMR spectrum of compound **3b**

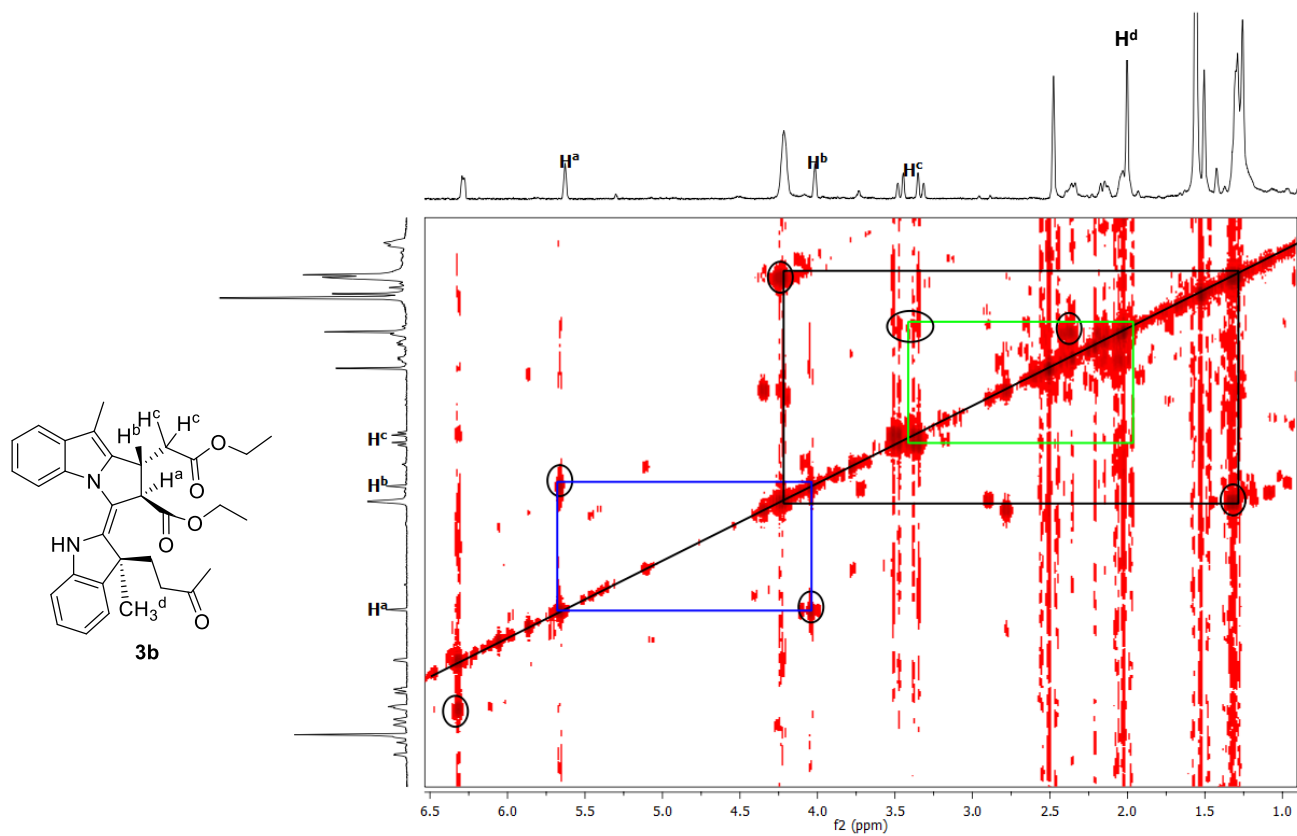

## $^1\text{H}$ - $^1\text{H}$ NOESY NMR spectrum of compound **3b**

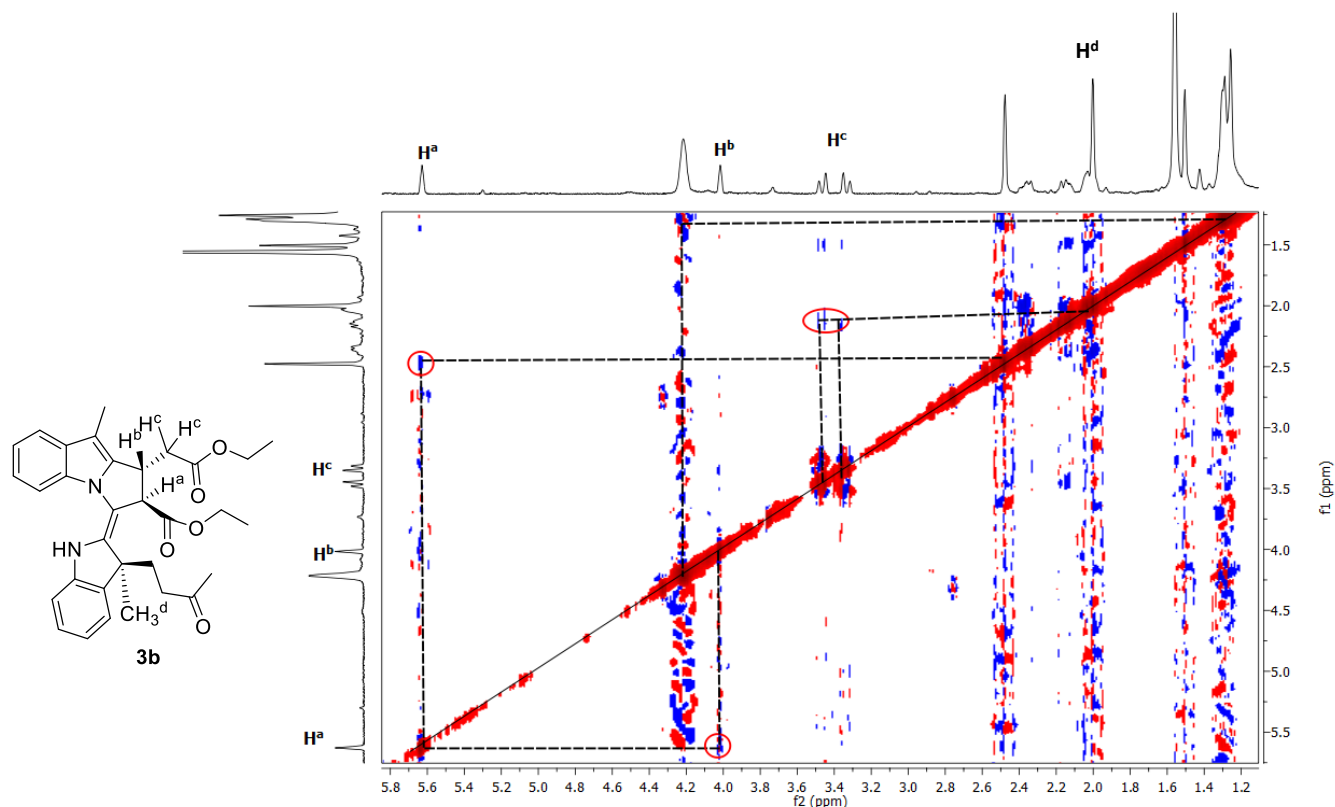

## Synthesis of pyrrolo[1,2-*a*]indole **3c**

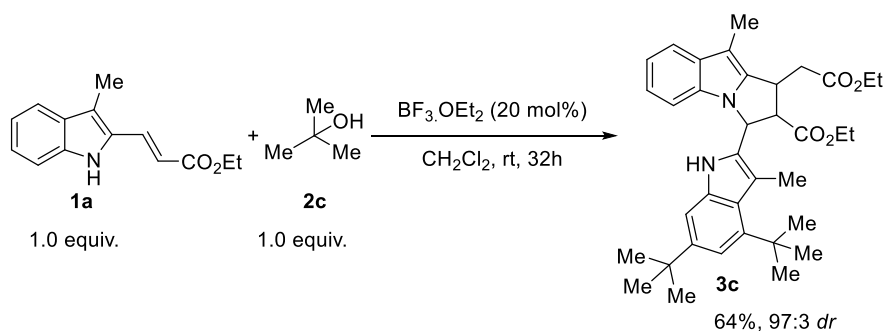

The title compound **3c** was prepared from ethyl (*E*)-3-(3-methyl-1*H*-indol-2-yl)acrylate **1a** (10 mg 0.044 mmol, 1.0 equiv.),  $\text{BF}_3 \cdot \text{OEt}_2$  (20 mol%) and *t*BuOH (4.2  $\mu\text{L}$ , 0.044 mmol, 1.0 equiv.) according to general procedure **B** with a reaction time of 32 h. The crude residue was purified by column chromatography on silica gel with an eluent of hexanes to EtOAc/hexanes (1/4) to furnish the title compound **3c** (8 mg 0.014 mmol, 64%) as a yellow solid;  $R_f=0.3$  (EtOAc/hexane 3/7); m.p. 260°C **IR** (neat):  $\nu_{\text{max}}/\text{cm}^{-1}$  30320, 1731, 1527, 1215;  $^1\text{H}$  NMR (500 MHz,  $\text{CDCl}_3$ )  $\delta$  9.07 (s, 1H), 7.47 (d,  $J = 1.6$  Hz, 1H), 7.44 (d,  $J = 8.0$  Hz, 1H), 7.21 (d,  $J = 1.8$  Hz, 1H), 6.98 (t,  $J = 7.5$  Hz, 1H), 6.86 (t,  $J = 7.6$  Hz, 1H), 6.77 (d,  $J = 8.2$  Hz, 1H), 5.98 (d,  $J = 7.4$  Hz, 1H), 4.27 – 4.17 (m, 3H), 4.13 – 4.06 (m, 2H), 3.98 – 3.93 (m, 1H), 3.27 – 3.21 (m, 1H), 3.09 – 3.03 (m, 1H), 2.50 (s, 3H), 2.28 (s, 3H), 1.43 (s, 9H), 1.36 (s, 9H), 1.28 (t,  $J = 7.1$  Hz, 3H), 1.18 (t,  $J = 7.1$  Hz, 3H);  $^{13}\text{C}\{^1\text{H}\}$  NMR (126 MHz,  $\text{CDCl}_3$ )  $\delta$  172.5, 172.2, 141.7, 139.6, 133.7, 133.2, 132.7, 132.2, 131.0, 129.1, 121.0, 119.1,

118.2, 117.6, 112.8, 110.4, 110.2, 101.4, 61.6, 61.0, 58.9, 54.7, 37.2, 35.8, 34.9, 34.7, 32.2, 30.2, 14.4, 14.2, 8.8, 8.5; **HRMS** (ESI/Q-TOF)  $m/z$ :  $[M+H]^+$  Calcd for  $C_{36}H_{47}N_2O_4$  571.3536; Found 571.3530.

### Synthesis of pyrrolo[1,2-*a*]indole **3d**

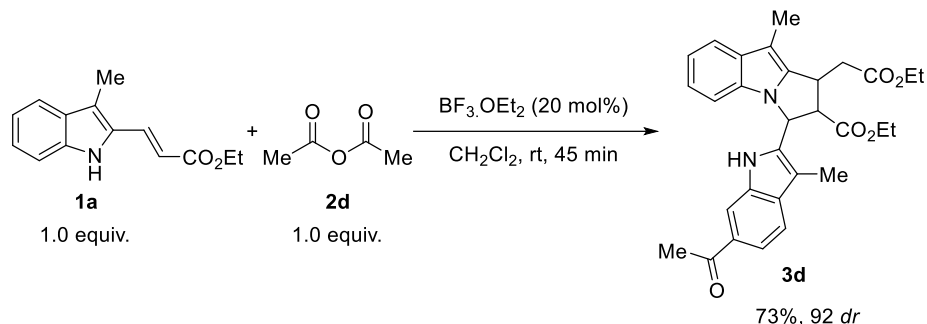

The title compound **3d** was prepared from ethyl (*E*)-3-(3-methyl-1*H*-indol-2-yl)acrylate **1a** (10 mg 0.044 mmol, 1.0 equiv.),  $BF_3 \cdot OEt_2$  (20 mol%) and acetic anhydride **2d** (4.2  $\mu$ L, 0.044 mmol, 1.0 equiv.) according to general procedure **B** with a reaction time of 45 min. The crude residue was purified by column chromatography on silica gel with an eluent of hexanes to EtOAc/hexanes (1/4) to furnish the title compound **3d** (8 mg 0.016 mmol, 73%) as a yellow solid;  $R_f$ =0.3 (EtOAc/hexane 3/7); m.p. 230°C; **IR** (neat):  $\nu_{max}/cm^{-1}$  3016, 2925, 2848, 1728, 1666, 1620, 1458, 1309, 1216, 1016;  **$^1H$  NMR** (500 MHz,  $CDCl_3$ )  $\delta$  9.23 (s, 1H), 8.30 (s, 1H), 7.82 (dd,  $J$  = 8.6, 1.5 Hz, 1H), 7.46 (d,  $J$  = 7.9 Hz, 1H), 7.23 (d,  $J$  = 8.6 Hz, 1H), 7.01 (t,  $J$  = 7.5 Hz, 1H), 6.88 (t,  $J$  = 7.6 Hz, 1H), 6.65 (d,  $J$  = 8.2 Hz, 1H), 5.99 (d,  $J$  = 7.4 Hz, 1H), 4.23 (tdd,  $J$  = 15.2, 9.6, 5.8 Hz, 3H), 4.17 – 4.10 (m, 2H), 4.01 (s, 1H), 3.27 (dd,  $J$  = 17.3, 5.3 Hz, 1H), 3.09 (dd,  $J$  = 17.3, 3.1 Hz, 1H), 2.69 (s, 3H), 2.57 (s, 3H), 2.28 (s, 3H), 1.30 (t,  $J$  = 7.1 Hz, 3H), 1.25 – 1.21 (m, 3H);  **$^{13}C\{^1H\}$  NMR** (126 MHz,  $CDCl_3$ )  $\delta$  198.5, 172.3, 172.1, 139.3, 139.1, 133.7, 133.4, 132.2, 129.4, 128.3, 123.0, 121.3, 121.2, 119.4, 118.6, 112.1, 111.2, 109.5, 101.7, 61.8, 61.2, 58.9, 54.3, 37.1, 35.6, 26.8, 14.4, 14.2, 8.7, 8.5; **HRMS** (ESI/Q-TOF)  $m/z$ :  $[M+H]^+$  Calcd for  $C_{30}H_{33}N_2O_5$  501.2389; Found 501.2387.

### Synthesis of pyrrolo[1,2-*a*]indole **3e**

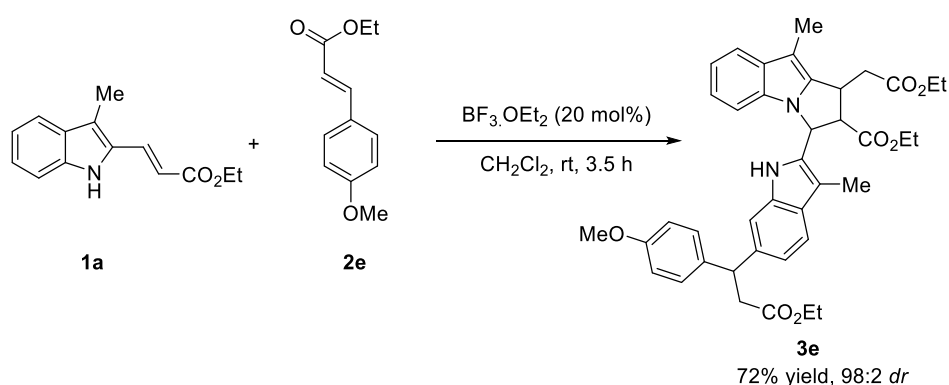

The title compound **3e** was prepared from ethyl (*E*)-3-(3-methyl-1*H*-indol-2-yl)acrylate **1a** (50 mg 0.218 mmol, 1.0 equiv.),  $BF_3 \cdot OEt_2$  (20 mol%) and ethyl (*E*)-3-(4-methoxyphenyl)acrylate **2e** (90 mg, 0.436 mmol, 2.0 equiv.) according to general procedure **C** with a reaction time of 3.5h. The crude residue was purified by column chromatography on silica gel with an

eluent of hexanes to EtOAc/hexanes (1/4) to furnish the title compound **3e** (52 mg 0.078 mmol, 72%) as a white solid;  $R_f=0.3$  (EtOAc/hexane 1/4); m.p. 210°C **IR** (neat):  $\nu_{\max}/\text{cm}^{-1}$  3020, 2362, 1716 (C=O), 1458, 1215, 752, 667; **<sup>1</sup>H NMR** (500 MHz, CDCl<sub>3</sub>)  $\delta$  8.63 (s, 1H), 7.46 (d,  $J = 8.3$  Hz, 2H), 7.24 (dd,  $J = 8.5, 2.6$  Hz, 2H), 7.10 (d,  $J = 8.3$  Hz, 1H), 7.01 (t,  $J = 7.1$  Hz, 2H), 6.88 (t,  $J = 7.8$  Hz, 1H), 6.83 (dd,  $J = 8.4, 2.4$  Hz, 2H), 6.71 – 6.64 (m, 1H), 5.94 (d,  $J = 7.2$  Hz, 1H), 4.63 (t,  $J = 8.0$  Hz, 1H), 4.25 – 4.19 (m, 2H), 4.12 (q,  $J = 7.1$  Hz, 2H), 4.09 – 3.97 (m, 4H), 3.77 (s, 3H), 3.18 (dd,  $J = 17.0, 5.8$  Hz, 1H), 3.08 (dd,  $J = 6.0$  Hz, 3H), 2.46 (s,  $J = 3.5$  Hz, 3H), 2.28 (s, 3H), 1.29 (t,  $J = 6.8$  Hz, 3H), 1.23 (t,  $J = 7.1$  Hz, 3H), 1.13 (t,  $J = 6.9$  Hz, 3H); **<sup>13</sup>C{<sup>1</sup>H} NMR**(126 MHz, CDCl<sub>3</sub>)  $\delta$  172.4, 172.2, 172.0, 158.1, 139.5, 136.8, 135.1, 134.9, 133.7, 132.3, 131.9, 128.8, 127.1, 122.7, 121.1, 119.3, 118.5, 117.3, 113.9, 111.4, 110.3, 109.8, 101.6, 61.7, 61.0, 60.4, 59.4, 55.4, 54.7, 46.7, 46.6, 41.8, 37.3, 36.1, 14.4, 14.2, 8.7, 8.5; **HRMS** (ESI/Q-TOF)  $m/z$ : [M+H]<sup>+</sup> Calcd for C<sub>40</sub>H<sub>45</sub>N<sub>2</sub>O<sub>7</sub> 665.3221; Found 665.3266.

### Synthesis of pyrrolo[1,2-*a*]indole **3f**

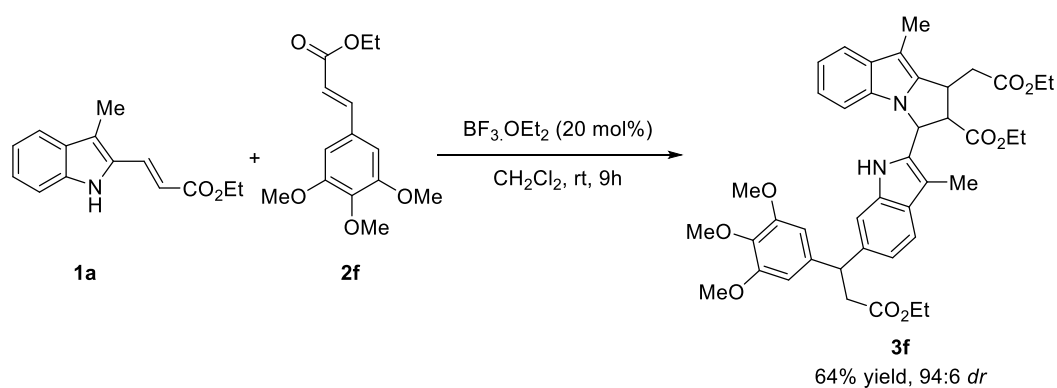

The title compound **3f** was prepared from ethyl (*E*)-3-(3-methyl-1*H*-indol-2-yl)acrylate **1a** (50 mg 0.218 mmol, 1.0 equiv.), BF<sub>3</sub>·OEt<sub>2</sub> (20 mol%) and ethyl (*E*)-3-(3,4,5-trimethoxyphenyl)acrylate **2f** (116 mg, 0.436 mmol, 2.0 equiv.) according to general procedure C with a reaction time of 9h. The crude residue was purified by column chromatography on silica gel with an eluent of hexanes to EtOAc/hexanes (1/4) to furnish the title compound **3f** (51 mg 0.070 mmol, 64%) as a white solid;  $R_f=0.3$  (EtOAc/hexane 1/4); m.p. 240°C; **IR** (neat):  $\nu_{\max}/\text{cm}^{-1}$  3020, 2933, 2364, 1718 (C=O), 1460, 1215, 744, 667; **<sup>1</sup>H NMR** (500 MHz, CDCl<sub>3</sub>)  $\delta$  8.67 (s, 1H), 7.46 (s, 2H), 7.12 (d,  $J = 7.7$  Hz, 1H), 7.06 – 6.99 (m, 2H), 6.88 (s, 1H), 6.67 (d,  $J = 6.9$  Hz, 1H), 6.54 (s, 2H), 5.95 (s, 1H), 4.61 (s, 1H), 4.22 (s, 2H), 4.14 – 4.04 (m, 6H), 4.01 – 3.97 (m, 1H), 3.83 (s, 6H), 3.80 (s, 3H), 3.18 (d,  $J = 17.1$  Hz, 1H), 3.09 (s, 3H), 2.46 (s, 3H), 2.28 (s, 3H), 2.08 – 1.99 (m, 1H), 1.22 (s, 3H), 1.13 (s, 3H), 0.84 (s, 3H); **<sup>13</sup>C{<sup>1</sup>H} NMR**(126 MHz, CDCl<sub>3</sub>)  $\delta$  172.3, 172.2, 172.0, 153.2, 140.3, 139.5, 136.6, 135.2, 133.8, 132.4, 132.1, 131.1, 128.9, 125.2, 122.5, 121.1, 119.3, 118.5, 117.7, 111.4, 109.8, 105.1, 101.7, 61.7, 61.0, 61.0, 60.5, 59.4, 56.3, 54.7, 47.7, 41.9, 37.3, 36.0, 19.3, 14.4, 14.3, 14.3, 8.7, 8.5; **HRMS** (ESI/Q-TOF)  $m/z$ : [M+H]<sup>+</sup> Calcd for C<sub>42</sub>H<sub>49</sub>N<sub>2</sub>O<sub>9</sub> 725.3438; Found 725.3428.



## Synthesis of pyrrolo[1,2-*a*]indole **3g**

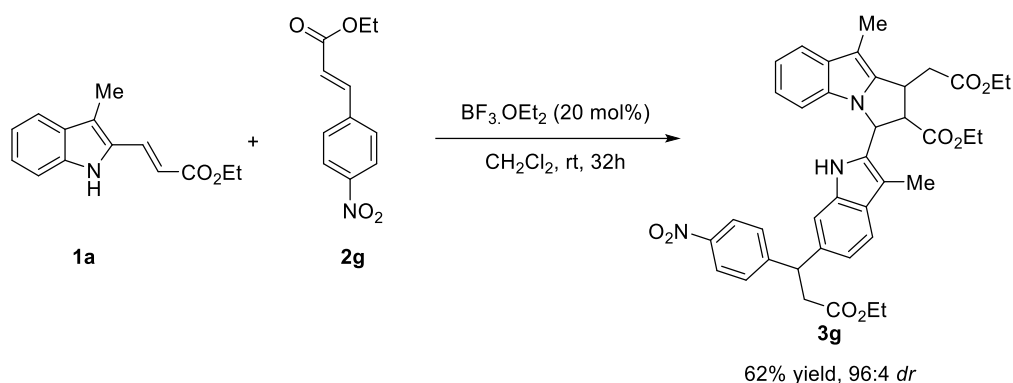

The title compound **3g** was prepared from ethyl (*E*)-3-(3-methyl-1*H*-indol-2-yl)acrylate **1a** (50 mg 0.218 mmol, 1.0 equiv.),  $\text{BF}_3 \cdot \text{OEt}_2$  (20 mol%) and ethyl (*E*)-3-(4-nitrophenyl)acrylate **2g** (97 mg, 0.438 mmol, 2.0 equiv.) according to general procedure **C** with a reaction time of 30h. The crude residue was purified by column chromatography on silica gel with an eluent of hexanes to EtOAc/hexanes (1/4) to furnish the title compound **3g** (46 mg 0.068 mmol, 62%) as a white solid;  $R_f=0.4$  (EtOAc/hexane 1/4); m.p. 195°C; **IR** (neat):  $\nu_{\text{max}}/\text{cm}^{-1}$  3020, 2362, 1731 (C=O), 1458, 1215, 744, 667; **<sup>1</sup>H NMR** (500 MHz,  $\text{CDCl}_3$ )  $\delta$  8.76 (s, 1H), 7.98 (d,  $J = 25.0$  Hz, 1H), 7.50 (s, 1H), 7.47 (s, 1H), 7.23 (s, 1H), 7.16 – 6.98 (m, 5H), 6.89 (s, 1H), 6.67 (d,  $J = 15.0$  Hz, 1H), 5.95 (s, 1H), 5.01 (s, 1H), 4.22 (s, 2H), 4.09 (d,  $J = 35.5$  Hz, 4H), 4.00 (s, 1H), 3.20 (d,  $J = 17.4$  Hz, 2H), 3.07 (d,  $J = 17.3$  Hz, 1H), 2.47 (s, 2H), 2.35 (s, 3H), 2.28 (s, 3H), 1.25 (m, 6H), 1.10 (s, 3H); **<sup>13</sup>C{<sup>1</sup>H} NMR** (126 MHz,  $\text{CDCl}_3$ )  $\delta$  172.2, 172.1, 171.3, 139.5, 136.4, 135.4, 132.3, 129.6, 128.9, 122.6, 122.3, 121.3, 121.1, 119.3, 119.1, 118.5, 117.4, 117.2, 111.7, 110.7, 109.7, 107.3, 101.7, 61.7, 61.0, 60.5, 59.4, 54.6, 40.2, 39.0, 37.3, 36.0, 31.7, 22.8, 21.2, 14.3, 8.5; **HRMS** (ESI/Q-TOF)  $m/z$ :  $[\text{M}+\text{MeCN}]^+$  Calcd for  $\text{C}_{41}\text{H}_{44}\text{N}_4\text{O}_8$  720.3159; Found 720.3201.

## 5. Characterization of compounds **4a-4f**

### Synthesis of self-dimer **4a**

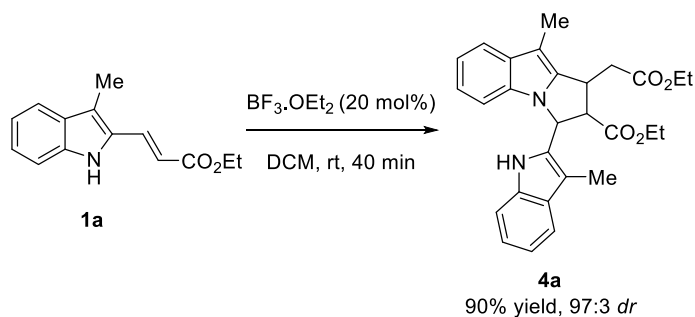

The title compound **4a** was prepared from ethyl (*E*)-3-(3-methyl-1*H*-indol-2-yl)acrylate **1a** (20 mg 0.087 mmol) and catalyst  $\text{BF}_3 \cdot \text{OEt}_2$  (20 mol%) according to general procedure **D** with a reaction time of 40 min. The crude residue was purified by column chromatography on silica gel with an eluent of EtOAc/hexanes (1/9) to furnish the title compound **4a** (18 mg 0.039 mmol, 90%) as a yellow solid;  $R_f=0.6$  (EtOAc/hexane 1/4); m.p. 250°C; **IR** (neat):  $\nu_{\text{max}}/\text{cm}^{-1}$  3392, 2918, 2850, 1726 (C=O), 1458, 1215, 1180, 1029, 738, 667; **<sup>1</sup>H NMR** (500 MHz,  $\text{CDCl}_3$ )  $\delta$  8.79 (s, 1H), 7.67 (d,  $J = 7.5$  Hz, 1H), 7.52 (d,  $J = 7.9$  Hz, 1H), 7.28 (d,  $J = 4.9$  Hz, 1H), 7.23 – 7.15 (m, 2H), 7.06 (t,  $J = 7.5$  Hz, 1H), 6.92 (t,  $J = 7.5$  Hz, 1H), 6.72 (d,  $J = 8.1$  Hz, 1H), 6.02 (d,  $J = 7.4$  Hz, 1H), 4.32 – 4.23 (m, 2H), 4.22 – 4.15 (m, 3H), 4.06 (s, 1H), 3.29 – 3.22 (m, 1H), 3.18 – 3.11 (m, 1H), 2.55 (s, 3H), 2.34 (s, 3H), 1.34 (d,  $J = 7.0$  Hz, 3H), 1.28 (d,  $J = 7.0$  Hz, 3H); **<sup>13</sup>C{<sup>1</sup>H} NMR**

**NMR**(126 MHz, CDCl<sub>3</sub>)  $\delta$  172.2, 172.0, 139.5, 136.4, 133.8, 132.4, 131.5, 128.8, 122.5, 121.2, 119.3, 119.2, 119.01, 118.5, 111.4, 110.4, 109.8, 101.7, 61.7, 61.0, 59.4, 54.7, 37.3, 36.1, 14.4, 14.3, 8.7, 8.5; **HRMS** (ESI/Q-TOF)  $m/z$ : [M+H]<sup>+</sup> Calcd for C<sub>28</sub>H<sub>31</sub>N<sub>2</sub>O<sub>4</sub> 459.2289; Found 459.2331.

### Synthesis of self-dimer 4b

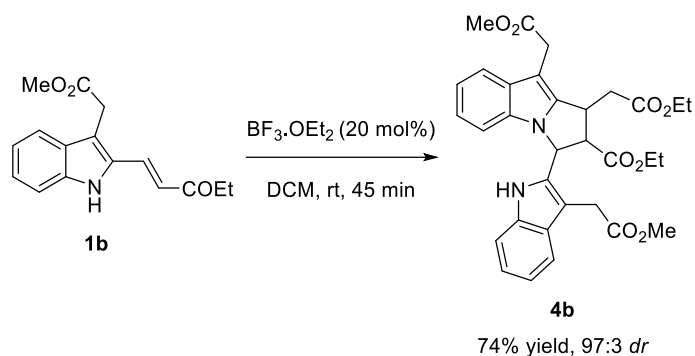

The title compound **4b** was prepared from ethyl (*E*)-3-(3-(2-methoxy-2-oxoethyl)-1*H*-indol-2-yl)acrylate **1b** (20 mg 0.070 mmol) and catalyst BF<sub>3</sub>·OEt<sub>2</sub> (20 mol%) according to general procedure **D** with a reaction time of 45 min. The crude residue was purified by column chromatography on silica gel with an eluent of EtOAc/hexanes (3/7) to furnish the title compound **4b** (15 mg 0.052 mmol, 74%) as a yellow solid;  $R_f=0.4$  (EtOAc/hexane 3/7); ; m.p. 220°C; **IR** (neat):  $\nu_{\text{max}}/\text{cm}^{-1}$  3012, 2923, 2846, 1728, 1600, 1514, 1216; **<sup>1</sup>H NMR** (500 MHz, CDCl<sub>3</sub>)  $\delta$  8.10 (s, 1H), 7.65 – 7.61 (m, 1H), 7.52 (d,  $J = 8.0$  Hz, 1H), 7.16 (dt,  $J = 11.7, 3.7$  Hz, 3H), 7.08 – 7.02 (m, 1H), 6.93 – 6.88 (m, 1H), 6.64 (d,  $J = 8.2$  Hz, 1H), 6.15 (d,  $J = 9.0$  Hz, 1H), 4.36 (dd,  $J = 14.9, 6.8$  Hz, 1H), 4.18 – 4.05 (m, 6H), 4.00 (d,  $J = 16.2$  Hz, 1H), 3.85 (d,  $J = 16.1$  Hz, 1H), 3.80 (d,  $J = 2.4$  Hz, 2H), 3.73 (s, 3H), 3.67 (s, 3H), 2.79 (t,  $J = 6.7$  Hz, 2H), 1.26 (t,  $J = 7.2$  Hz, 3H), 1.23 (t,  $J = 7.2$  Hz, 3H); **<sup>13</sup>C{<sup>1</sup>H} NMR**(126 MHz, CDCl<sub>3</sub>)  $\delta$  172.6, 172.0, 171.4, 169.9, 142.1, 136.1, 132.4, 132.3, 131.6, 128.2, 123.1, 122.1, 120.2, 120.1, 119.1, 118.9, 111.5, 110.5, 108.5, 100.2, 61.7, 61.0, 58.9, 54.7, 52.2, 52.0, 35.5, 35.5, 30.2, 29.8, 14.2, 14.2; **HRMS** (ESI/Q-TOF)  $m/z$ : [M+H]<sup>+</sup> Calcd for C<sub>32</sub>H<sub>35</sub>N<sub>2</sub>O<sub>8</sub> 575.2393; Found 575.2413.

### Synthesis of self-dimer 4c

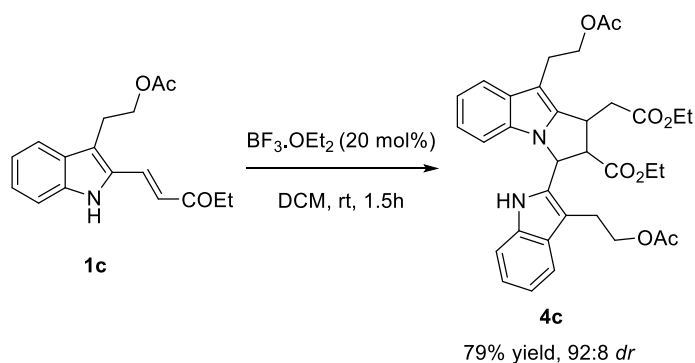

The title compound **4c** was prepared from ethyl (*E*)-3-(3-(2-acetoxyethyl)-1*H*-indol-2-yl)acrylate **1c** (20 mg 0.066 mmol) and catalyst BF<sub>3</sub>·OEt<sub>2</sub> (20 mol%) according to general procedure **D** with a reaction time of 1.5h. The crude residue was purified by column chromatography on silica gel with an eluent of EtOAc/hexanes (1/4) to furnish the title compound **4c** (16 mg 0.026 mmol, 79%) as a yellow solid; *R*<sub>f</sub>=0.6 (EtOAc/hexane 3/7); m.p. 205°C; **IR** (neat):  $\nu_{\max}/\text{cm}^{-1}$  3020, 2933, 2844, 1735, 1456, 1365, 1213, 1024; **<sup>1</sup>H NMR** (500 MHz, CDCl<sub>3</sub>)  $\delta$  8.93 (s, 1H), 7.69 (d, *J* = 7.6 Hz, 1H), 7.52 (d, *J* = 8.0 Hz, 1H), 7.24 (d, *J* = 7.7 Hz, 1H), 7.19 – 7.12 (m, 2H), 7.02 (t, *J* = 7.2 Hz, 1H), 6.88 (t, *J* = 7.6 Hz, 1H), 6.71 (d, *J* = 8.2 Hz, 1H), 6.04 (d, *J* = 7.3 Hz, 1H), 4.43 (t, *J* = 7.2 Hz, 2H), 4.28 – 4.22 (m, 4H), 4.16 – 4.12 (m, 2H), 4.12 – 4.08 (m, 1H), 4.04 – 4.00 (m, 1H), 3.40 (dt, *J* = 15.4, 7.8 Hz, 1H), 3.27 (ddd, *J* = 21.0, 16.0, 5.9 Hz, 2H), 3.14 (dd, *J* = 17.6, 3.4 Hz, 1H), 3.06 (t, *J* = 7.4 Hz, 2H), 2.07 (s, 3H), 1.99 (s, 3H), 1.29 (t, *J* = 7.1 Hz, 3H), 1.24 (t, *J* = 7.1 Hz, 3H); **<sup>13</sup>C{<sup>1</sup>H} NMR**(126 MHz, CDCl<sub>3</sub>)  $\delta$  172.0, 171.9, 171.3, 171.3, 140.8, 136.7, 136.4, 133.1, 132.7, 128.0, 122.7, 121.5, 119.8, 119.6, 119.2, 118.6, 111.6, 110.7, 110.1, 102.0, 64.9, 64.8, 61.9, 61.2, 59.4, 54.8, 37.5, 35.8, 23.9, 23.8, 21.3, 21.2, 14.4, 14.3; **HRMS** (ESI/Q-TOF) *m/z*: [M+H]<sup>+</sup> Calcd for C<sub>34</sub>H<sub>39</sub>N<sub>2</sub>O<sub>8</sub> 603.2706; Found 603.2705.

### Synthesis of self-dimer 4d

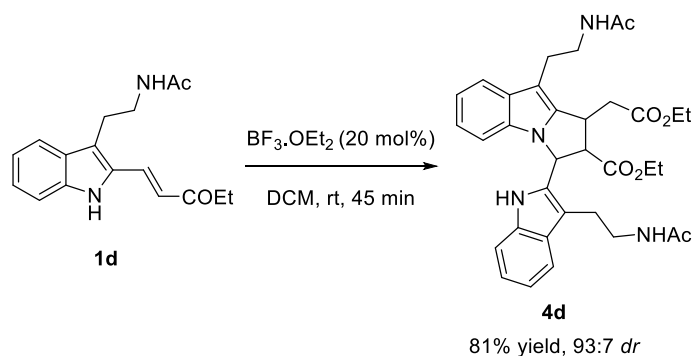

The title compound **4d** was prepared from ethyl (*E*)-3-(3-(2-acetamidoethyl)-1*H*-indol-2-yl)acrylate **1d** (20 mg 0.067 mmol) and catalyst BF<sub>3</sub>·OEt<sub>2</sub> (20 mol%) according to general procedure **D** with a reaction time of 45 min. The crude residue was purified by column chromatography on silica gel with an eluent of MeOH/DCM (0.2/9.8) to furnish the title compound **4d** (17 mg 0.028 mmol, 81%) as a yellow solid; *R*<sub>f</sub>=0.2 (MeOH/DCM 0.2/9.8); m.p. 230°C **IR** (neat):  $\nu_{\max}/\text{cm}^{-1}$  3022, 2920, 2856, 1731, 1222; **<sup>1</sup>H NMR** (500 MHz, CDCl<sub>3</sub>)  $\delta$  9.11 (s, 1H), 7.69 – 7.63 (m, 2H), 7.56 (s, 1H), 7.47 (d, *J* = 6.7 Hz, 2H), 7.15 (dt, *J* = 14.3, 6.9 Hz, 2H), 7.00 (t, *J* = 7.3 Hz, 1H), 6.86 (t, *J* = 7.4 Hz, 1H), 6.64 (d, *J* = 8.0 Hz, 1H), 5.98 (d, *J* = 7.1 Hz, 1H), 4.24 (dd, *J* = 11.5, 6.9 Hz, 2H), 4.14 (dd, *J* = 14.2, 7.1 Hz, 3H), 4.00 (s, 1H), 3.68 (d, *J* = 4.8 Hz, 2H), 3.50 (d, *J* = 16.1 Hz, 2H), 3.34 (d, *J* = 16.5 Hz, 2H), 3.15 (d, *J* = 15.4 Hz, 2H), 2.96 (d, *J* = 5.6 Hz, 2H), 1.93 (d, *J* = 1.9 Hz, 6H), 1.30 (t, , 3H), 1.27 – 1.19 (t, 3H); **<sup>13</sup>C{<sup>1</sup>H} NMR**(126 MHz, )  $\delta$  172.4, 170.5, 140.5, 133.2, 132.5, 132.4, 132.30, 132.2, 128.7, 128.6, 122.9, 121.5, 119.9, 119.8, 119.3, 118.6, 112.0, 111.6, 109.9, 103.4, 61.3, 54.5, 40.6, 39.0, 37.3, 35.8, 33.4, 32.1, 26.9, 26.0, 24.3, 23.4, 14.3, 11.0; **HRMS** (ESI/Q-TOF) *m/z*: [M+H]<sup>+</sup> Calcd for C<sub>34</sub>H<sub>41</sub>N<sub>4</sub>O<sub>6</sub> 601.3026; Found 601.3032.

### Synthesis of self-dimer 4e

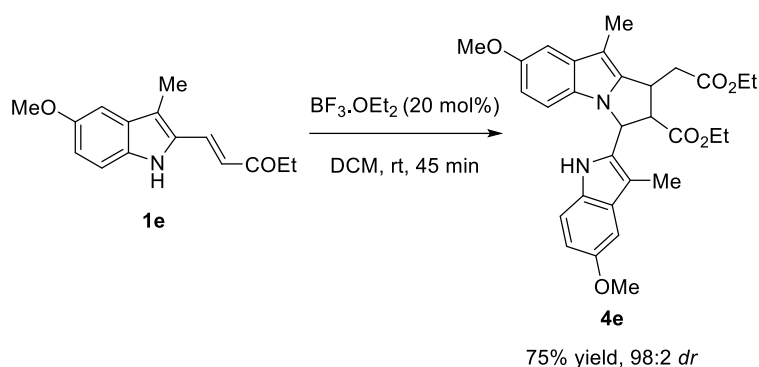

The title compound **4e** was prepared from ethyl (*E*)-3-(5-methoxy-3-methyl-1*H*-indol-2-yl)acrylate **1e** (20 mg 0.077 mmol) and catalyst  $\text{BF}_3 \cdot \text{OEt}_2$  (20 mol%) according to general procedure **D** with a reaction time of 45 min. The crude residue was purified by column chromatography on silica gel with an eluent of EtOAc/hexane (1/9) to furnish the title compound compound **4e** (15 mg 0.029 mmol, 75%) as a yellow solid;  $R_f=0.6$  (EtOAc/hexane 1/4); m.p. 240°C; **IR** (neat):  $\nu_{\text{max}}/\text{cm}^{-1}$  3016, 2918, 2848, 1739, 1456, 1213;  **$^1\text{H NMR}$**  (500 MHz,  $\text{CDCl}_3$ )  $\delta$  8.56 (s, 1H), 7.11 (d,  $J = 8.7$  Hz, 1H), 7.06 – 7.03 (m, 1H), 6.91 (s, 1H), 6.82 (dd,  $J = 8.7, 2.5$  Hz, 1H), 6.54 (dd,  $J = 6.7, 4.5$  Hz, 2H), 5.89 (d,  $J = 7.4$  Hz, 1H), 4.22 (dd,  $J = 7.1, 3.1$  Hz, 2H), 4.13 (d,  $J = 7.2$  Hz, 2H), 3.97 (d,  $J = 9.0$  Hz, 2H), 3.89 (d,  $J = 4.6$  Hz, 3H), 3.80 (s, 3H), 3.20 – 3.03 (m, 2H), 2.44 (s, 3H), 2.25 (s, 3H), 1.26 (m, 6H);  **$^{13}\text{C}\{^1\text{H}\}$  NMR** (126 MHz,  $\text{CDCl}_3$ )  $\delta$  172.2, 172.0, 154.2, 154.1, 140.4, 134.2, 132.4, 131.5, 129.2, 127.8, 112.6, 112.1, 110.9, 110.5, 110.1, 101.4, 101.2, 101.1, 61.6, 61.0, 59.6, 56.1, 56.1, 55.0, 37.5, 36.2, 14.4, 14.3, 8.7, 8.6; **HRMS** (ESI/Q-TOF)  $m/z$ :  $[\text{M}+\text{H}]^+$  Calcd for  $\text{C}_{30}\text{H}_{35}\text{N}_2\text{O}_6$  519.2495; Found 519.2506.

### Synthesis of self-dimer 4f

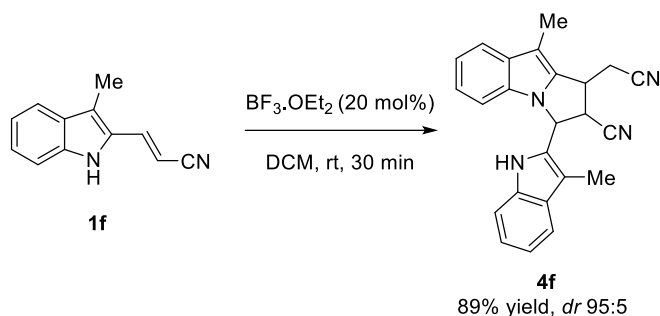

The title compound **4f** was prepared from (*E*)-3-(3-methyl-1*H*-indol-2-yl)acrylonitrile **1f** (20 mg 0.110 mmol) and catalyst  $\text{BF}_3 \cdot \text{OEt}_2$  (20 mol%) according to general procedure **D** with a reaction time of 30 min. The crude residue was purified by column chromatography on silica gel with an eluent of EtOAc/hexane (1/4) to furnish the title compound **4f** (18 mg 0.049 mmol, 89%) as a yellow solid;  $R_f=0.4$  (EtOAc/hexane 1/4); m.p. 190°C; **IR** (neat):  $\nu_{\text{max}}/\text{cm}^{-1}$  3012, 2985, 2898, 2310, 1448, 1377, 1232, 1041;  **$^1\text{H NMR}$**  (500 MHz,  $\text{CDCl}_3$ )  $\delta$  8.00 (s, 1H), 7.66 (d,  $J = 7.9$  Hz, 1H), 7.56 (d,  $J = 8.0$  Hz, 1H), 7.26 – 7.17 (m, 3H), 7.12 (dd,  $J = 11.1, 4.0$  Hz, 1H), 7.01 – 6.97 (m, 1H), 6.62 (d,  $J = 8.2$  Hz, 1H), 5.88 (d,  $J = 8.4$  Hz, 1H), 3.74 (t,  $J = 8.7$  Hz, 1H), 3.32 (dd,  $J = 17.5, 4.9$  Hz, 1H), 3.10 (dd,  $J = 17.5, 4.0$  Hz, 1H), 2.76 (d,  $J = 6.4$  Hz, 1H), 2.58 – 2.48 (m, 3H), 2.43 – 2.37 (m, 3H);  **$^{13}\text{C}\{^1\text{H}\}$  NMR** (101 MHz,  $\text{CDCl}_3$ )  $\delta$  136.5, 136.0, 125.5, 125.0, 123.7, 122.9, 120.6,

120.2, 120.0, 119.5, 119.4, 118.6, 116.4, 114.8, 113.9, 112.1, 111.7, 110.2, 44.9, 39.0, 32.1, 22.8, 21.2, 14.3.; **HRMS** (ESI/Q-TOF)  $m/z$ :  $[M+H-CN]^+$  Calcd for  $C_{23}H_{21}N_3$  339.1735; Found 339.1727.

## 6. Characterization of compounds 5a-5d

### Synthesis of substituted pyrrolo[1,2-a]indolyl furo[2,3-b]indole 5a

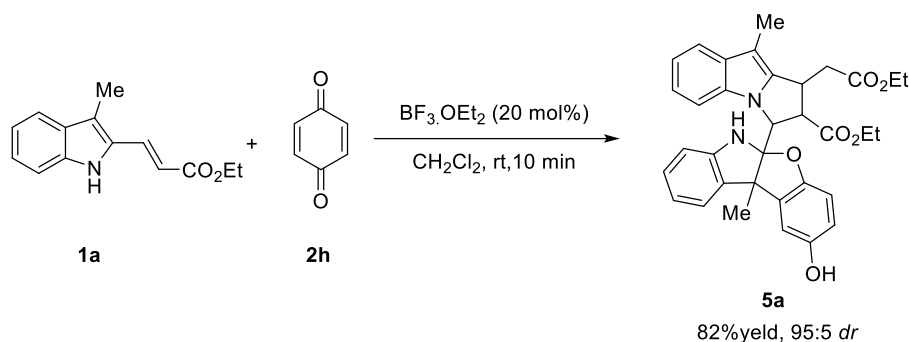

The title compound **5a** was prepared from ethyl (*E*)-3-(3-methyl-1*H*-indol-2-yl)acrylate **1a** (10 mg 0.044 mmol, 1.0 equiv.),  $BF_3 \cdot OEt_2$  (20 mol%) and 1,4-benzoquinone **2h** (7 mg, 0.065 mmol, 1.5 equiv.) according to general procedure **E** with a reaction time of 10 min. The crude residue was purified by column chromatography on silica gel with an eluent of hexanes to EtOAc/hexanes (2/3) to furnish the title compound **5a** (10 mg, 0.018 mmol, 82%) as a white solid;  $R_f=0.4$  (EtOAc/hexane 2/3); m.p. 260°C; **IR** (neat):  $\nu_{max}/cm^{-1}$  3390, 2918, 2848, 1731 (C=O), 1494, 1309, 1218, 771;  **$^1H$  NMR** (500 MHz,  $CDCl_3$ )  $\delta$  7.55 (d,  $J = 7.5$  Hz, 1H), 7.47 (s, 1H), 7.16 (t,  $J = 7.0$  Hz, 1H), 7.14 – 7.11 (m, 1H), 7.10 – 7.07 (m, 1H), 6.88 (d,  $J = 2.3$  Hz, 1H), 6.75 (t,  $J = 7.6$  Hz, 1H), 6.66 (t,  $J = 7.4$  Hz, 1H), 6.57 (d,  $J = 8.5$  Hz, 1H), 6.52 (dd,  $J = 8.5, 2.5$  Hz, 1H), 5.99 (d,  $J = 7.8$  Hz, 1H), 5.92 (d,  $J = 3.4$  Hz, 1H), 4.98 (s, 1H), 4.34 – 4.24 (m, 2H), 4.12 – 4.05 (m, 2H), 3.70 (dd,  $J = 9.5, 3.4$  Hz, 1H), 3.51 – 3.48 (m, 1H), 3.40 (td,  $J = 10.2, 4.3$  Hz, 1H), 2.80 (dd,  $J = 17.8, 10.7$  Hz, 1H), 2.59 (dd,  $J = 17.8, 4.3$  Hz, 1H), 2.39 (s, 3H), 1.75 (s, 3H), 1.31 (t,  $J = 7.1$  Hz, 3H), 1.21 (t,  $J = 7.2$  Hz, 3H);  **$^{13}C\{^1H\}$  NMR** (126 MHz,  $CDCl_3$ )  $\delta$  172.2, 171.3, 151.8, 150.1, 143.3, 137.3, 136.2, 133.7, 130.8, 129.1, 128.5, 122.6, 122.5, 119.9, 119.6, 118.94, 118.88, 114.7, 111.5, 111.2, 110.4, 110.0, 109.6, 66.0, 61.6, 61.0, 54.7, 54.1, 41.2, 31.9, 22.2, 14.2, 14.2, 8.8; **HRMS** (ESI/Q-TOF)  $m/z$ :  $[M-2H]^+$  Calcd for  $C_{34}H_{33}N_2O_6$  565.2339; Found 565.2359.

### Synthesis of substituted pyrrolo[1,2-a]indolyl furo[2,3-b]indole 5b

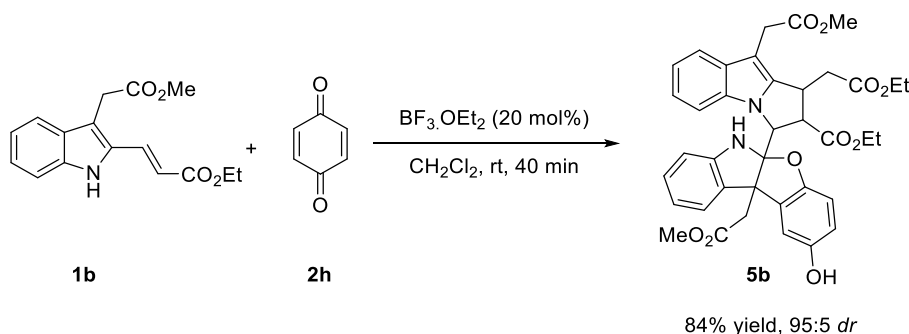

The title compound **5b** was prepared from ethyl (*E*)-3-(3-(2-methoxy-2-oxoethyl)-1*H*-indol-2-yl)acrylate **1b** (20 mg 0.070 mmol, 1.0 equiv.),  $BF_3 \cdot OEt_2$  (20 mol%) and 1,4-benzoquinone **2h** (11 mg, 0.102 mmol, 1.5 equiv.) according to general

procedure **E** with a reaction time of 40 min. The crude residue was purified by column chromatography on silica gel with an eluent of hexanes to EtOAc/hexanes (3/7) to furnish the title compound **5b** (20 mg, 0.029 mmol, 84%) as a white solid;  $R_f=0.7$  (EtOAc/hexane 1/1); ; m.p. 242°C; **IR** (neat):  $\nu_{\max}/\text{cm}^{-1}$  3018, 1741, 1556, 1203, 1006; **<sup>1</sup>H NMR** (500 MHz, CDCl<sub>3</sub>)  $\delta$  8.71 (s, 1H), 7.58 (d,  $J = 7.8$  Hz, 1H), 7.33 (d,  $J = 8.0$  Hz, 1H), 7.16 (ddd,  $J = 20.6, 11.5, 7.1$  Hz, 3H), 6.93 (t,  $J = 7.7$  Hz, 1H), 6.88 (d,  $J = 2.4$  Hz, 1H), 6.81 (t,  $J = 7.4$  Hz, 1H), 6.73 (d,  $J = 8.5$  Hz, 1H), 6.62 (dd,  $J = 8.5, 2.6$  Hz, 1H), 6.29 (d,  $J = 7.9$  Hz, 1H), 5.25 (d,  $J = 9.1$  Hz, 1H), 4.17 – 4.05 (m, 3H), 4.00 – 3.93 (m, 3H), 3.85 – 3.78 (m, 1H), 3.64 (s, 3H), 3.51 (s, 3H), 3.31 (s, 2H), 2.88 – 2.82 (m, 1H), 2.77 – 2.70 (m, 1H), 2.05 (s, 1H), 1.21-1.17 (m, 6H); **<sup>13</sup>C{<sup>1</sup>H} NMR**(126 MHz, CDCl<sub>3</sub>)  $\delta$  172.3, 172.0, 171.2, 170.3, 151.1, 150.6, 147.7, 135.8, 135.2, 134.4, 131.7, 129.0, 129.0, 122.7, 122.5, 121.6, 119.9, 119.0, 115.6, 111.3, 111.0, 110.9, 110.0, 105.8, 61.6, 60.9, 59.8, 59.1, 57.9, 52.0, 43.6, 40.6, 34.4, 29.9, 24.8, 22.5, 14.2, 14.1; **HRMS** (ESI/Q-TOF) m/z: [M+H]<sup>+</sup> Calcd for C<sub>38</sub>H<sub>39</sub>N<sub>2</sub>O<sub>10</sub> 683.2599; Found 683.2607.

### Synthesis of substituted pyrrolo[1,2-a]indolyl furo[2,3-b]indole **5c**

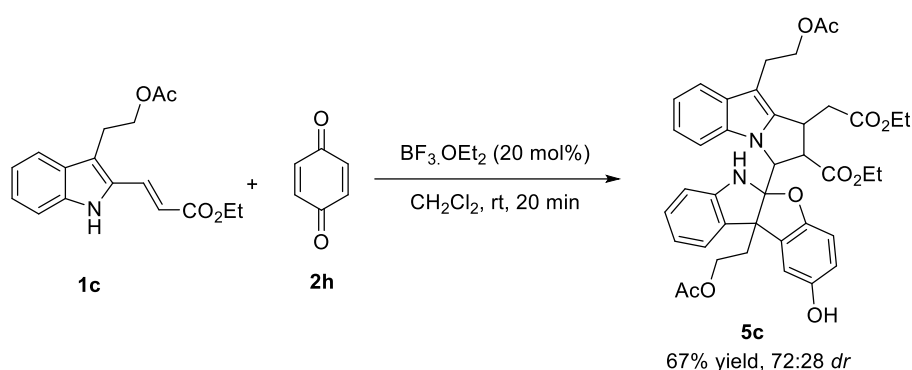

The title compound **5c** was prepared from ethyl (*E*)-3-(3-(2-acetoxyethyl)-1*H*-indol-2-yl)acrylate **1c** (10 mg 0.033 mmol, 1.0 equiv.), BF<sub>3</sub>·OEt<sub>2</sub> (20 mol%) and 1,4-benzoquinone **2h** (5 mg, 0.050 mmol, 1.5 equiv.) according to general procedure **E** with a reaction time of 20 min. The crude residue was purified by column chromatography on silica gel with an eluent of hexanes to EtOAc/hexanes (3/7) to furnish the title compound **5c** (8 mg, 0.011 mmol, 67%) as a white solid;  $R_f=0.7$  (EtOAc/hexane 1/1); ; m.p. 230°C; **IR** (neat):  $\nu_{\max}/\text{cm}^{-1}$  3018, 2854, 2929, 1731, 1460, 1232, 1006; **<sup>1</sup>H NMR** (500 MHz, CDCl<sub>3</sub>)  $\delta$  8.57 – 8.46 (m, 1H), 7.68 – 7.60 (m, 1H), 7.33 – 7.30 (m, 1H), 7.24 – 7.21 (m, 1H), 7.20 – 7.16 (m, 1H), 7.14 – 7.10 (m, 1H), 6.98 – 6.94 (m, 1H), 6.88 – 6.83 (m, 2H), 6.80 – 6.75 (m, 1H), 6.67 – 6.62 (m, 1H), 6.28 – 6.22 (m, 1H), 5.18 – 5.11 (m, 1H), 4.29 – 4.27 (m, 1H), 4.17 – 4.09 (m, 4H), 4.07 – 4.04 (m, 2H), 3.68 – 3.60 (m, 1H), 3.53 – 3.47 (m, 1H), 3.42 – 3.36 (m, 1H), 3.24 – 3.18 (m, 1H), 3.13 – 3.06 (m, 1H), 2.98 – 2.88 (m, 1H), 2.79 – 2.75 (m, 2H), 2.57 – 2.50 (m, 2H), 2.03 (s, 3H), 1.99 (s, 3H), 0.87-0.81 (m, 6H); **<sup>13</sup>C{<sup>1</sup>H} NMR**(101 MHz, CDCl<sub>3</sub>)  $\delta$  171.4, 171.3 (2 x C), 170.9, 150.9, 150.6, 135.9, 134.2, 133.4, 132.5, 129.1, 129.0, 123.3, 122.5, 121.6, 119.7, 119.6, 119.2, 115.6, 111.3, 111.2, 110.4, 110.2, 109.0, 64.9, 61.8, 61.0, 60.0, 59.3, 58.4, 43.9, 39.0, 37.2, 34.0, 33.3, 32.1, 27.3, 26.9, 22.8, 14.3; **HRMS** (ESI/Q-TOF) m/z: [M]<sup>+</sup> Calcd for C<sub>40</sub>H<sub>42</sub>N<sub>2</sub>O<sub>10</sub> 710.2839; Found 710.2817.

### Synthesis of substituted pyrrolo[1,2-a]indolyl furo[2,3-b]indole **5d**

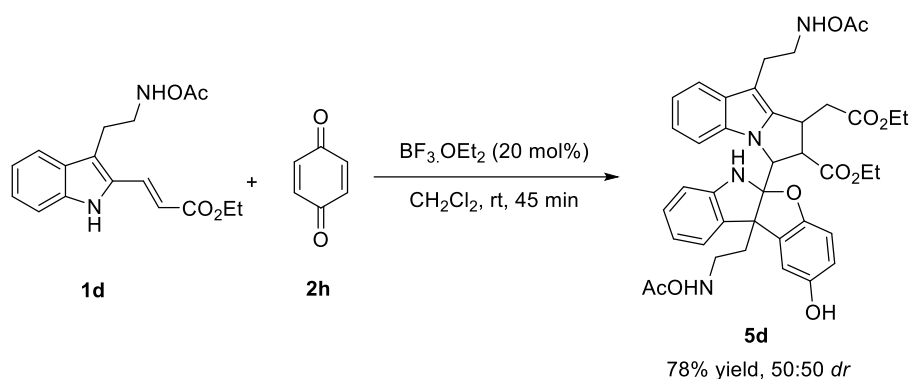

The title compound **5d** was prepared from ethyl (*E*)-3-(3-(2-acetamidoethyl)-1H-indol-2-yl)acrylate **1d** (20 mg 0.066 mmol, 1.0 equiv.),  $\text{BF}_3 \cdot \text{OEt}_2$  (20 mol%) and 1,4-benzoquinone **2h** (11 mg, 0.099 mmol, 1.5 equiv.) according to general procedure **E** with a reaction time of 45 min. The crude residue was purified by column chromatography on silica gel with an eluent of hexanes to MeOH/DCM (0.5/9.5) to furnish the title compound **5d** (19 mg, 0.026 mmol, 78%) as a yellow solid;  $R_f=0.3$  (MeOH/DCM 0.5/9.5); m.p. 210°C; **IR** (neat):  $\nu_{\text{max}}/\text{cm}^{-1}$  3020, 2923, 1762, 1515, 1213, 763;  **$^1\text{H NMR}$**  (500 MHz,  $\text{CDCl}_3$ , rotamers)  $\delta$  7.70 – 7.63 (m, 3H), 7.55 (d,  $J = 7.6$  Hz, 1H), 7.47 (td,  $J = 7.6, 2.8$  Hz, 3H), 7.19 (s, 1H), 7.11 (t,  $J = 6.8$  Hz, 1H), 6.96 (dd,  $J = 15.4, 13.5$  Hz, 1H), 6.86 (d,  $J = 12.8$  Hz, 1H), 6.73 (s, 1H), 6.69 – 6.52 (m, 3H), 6.38 (dd,  $J = 15.5, 2.7$  Hz, 1H), 6.04 – 5.74 (m, 1H) (OH), 4.23 (dd,  $J = 14.3, 7.1$  Hz, 2H), 4.13 (tt,  $J = 11.3, 5.6$  Hz, 3H), 3.76 – 3.47 (m, 3H), 3.21 – 2.86 (m, 3H), 2.69 – 2.57 (m, 2H), 2.21 (d,  $J = 9.9$  Hz, 1H), 2.09 (s, 2H), 2.04 (s, 1H), 1.88 (t,  $J = 11.3$  Hz, 3H), 0.88-0.82 (m, 6H);  **$^{13}\text{C}\{^1\text{H}\}$  NMR** (126 MHz, rotamers)  $\delta$  172.5, 171.3, 170.6, 170.6, 135.3, 134.0, 133.6, 132.5, 132.2, 129.0, 128.9, 128.8, 125.3, 125.1, 124.1, 123.6, 122.7, 122.6, 122.1, 119.8, 119.2, 119.2, 119.1, 115.8, 114.2, 112.3, 111.3, 111.3, 110.6, 110.5, 110.4, 110.0, 61.8, 61.3, 61.1, 60.5, 58.9, 43.4, 39.0, 37.5, 37.2, 36.8, 36.7, 35.2, 34.5, 34.2, 33.9, 33.7, 33.6, 33.5, 33.3, 32.8, 32.3, 32.0, 31.7, 31.5, 30.4, 30.3, 30.0, 29.0, 27.2, 26.8, 26.5, 26.0, 23.85, 23.79, 23.5, 23.3, 22.8, 21.1, 14.2, 14.0, 11.5, 11.0; **HRMS** (ESI/Q-TOF)  $m/z$ :  $[\text{M}+\text{H}]^+$  Calcd for  $\text{C}_{40}\text{H}_{45}\text{N}_4\text{O}_8$  709.3237; Found 709.3235.

## 7. Controlled experiments

### Synthesis of compound 6

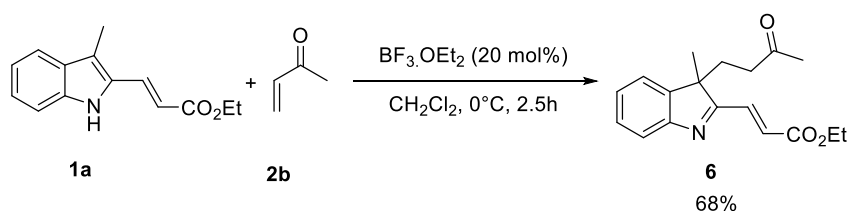

Under nitrogen atmosphere, an oven dried 10 mL round bottom flask, equipped with a magnetic stirring bar, was charged with ethyl (*E*)-3-(3-methyl-1H-indol-2-yl)acrylate **1a** (10 mg 0.044 mmol, 1.0 equiv.) and  $\text{CH}_2\text{Cl}_2$  (0.6 mL). To this solution was added dropwise  $\text{BF}_3 \cdot \text{OEt}_2$  (20 mol%) followed by addition of methyl vinyl ketone **2b** (5.9  $\mu\text{L}$ , 0.066 mmol, 1.5 equiv.) at 0°C. Then the whole reaction mixture was allowed to stir for 2.5h at 0°C. After completion of the reaction (monitored by TLC), water (1 mL) was added to the reaction mixture, which was then extracted with  $\text{CH}_2\text{Cl}_2$  (3×10 mL) and, dried





118.1, 111.7, 111.3, 109.2, 107.1, 60.5, 56.0, 56.0, 47.0, 41.8, 14.3, 11.6, 8.55; **HRMS** (ESI/Q-TOF)  $m/z$ :  $[M+H]^+$  Calcd for  $C_{23}H_{28}NO_4$  382.2018; Found 382.2011.

### Synthesis of compound **4g**: cross-dimerization

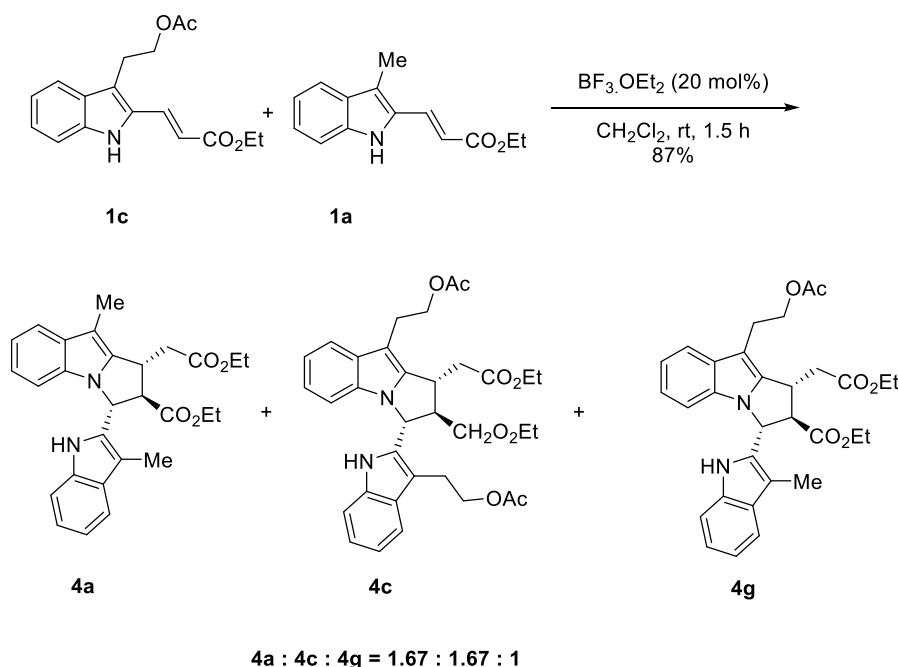

Under nitrogen atmosphere, an oven dried 10 mL round bottom flask, equipped with a magnetic stirring bar, was charged with ethyl (*E*)-3-(3-(2-acetoxyethyl)-1*H*-indol-2-yl)acrylate **1a** (10 mg 0.044 mmol, 1.0 equiv.) and ethyl (*E*)-3-(3-methyl-1*H*-indol-2-yl)acrylate **1c** (13 mg 0.044 mmol, 1.0 equiv.) and  $\text{CH}_2\text{Cl}_2$  (1.0 mL). To this solution was added dropwise  $\text{BF}_3 \cdot \text{OEt}_2$  (20 mol%) at rt. Then the whole reaction mixture was allowed to stir for 1.5h at rt. After completion of the reaction (monitored by TLC), water (1 mL) was added to the reaction mixture, which was then extracted with  $\text{CH}_2\text{Cl}_2$  (3×10 mL) and, dried over  $\text{Na}_2\text{SO}_4$ . Evaporation of the solvent and purification of the residue on silica gel column using EtOAc/hexane (1/9) as eluent furnished compound **4a** (8 mg, 0.017 mmol, 39%), compound **4c** (8 mg, 0.013 mmol, 30%) and compound **4g** (4 mg, 0.008 mmol, 18%);  $R_f = 0.4$  (EtOAc/hexane 2/8); m.p. 225°C;  $^1\text{H NMR}$  (500 MHz,  $\text{CDCl}_3$ )  $\delta$  8.84 (s, 1H), 7.69 (d,  $J = 7.6$  Hz, 1H), 7.47 (d,  $J = 7.9$  Hz, 1H), 7.23 (d,  $J = 7.4$  Hz, 1H), 7.18 – 7.12 (m, 2H), 7.01 (t,  $J = 7.5$  Hz, 1H), 6.86 (dd,  $J = 11.2, 4.0$  Hz, 1H), 6.68 (d,  $J = 8.2$  Hz, 1H), 6.02 (d,  $J = 7.4$  Hz, 1H), 4.42 (dt,  $J = 6.6, 4.4$  Hz, 2H), 4.24 (qd,  $J = 7.1, 2.8$  Hz, 2H), 4.13 (dtd,  $J = 10.3, 7.4, 2.7$  Hz, 3H), 3.99 (t,  $J = 8.0$  Hz, 1H), 3.38 (s, 1H), 3.29 – 3.19 (m, 2H), 3.09 (dd,  $J = 17.3, 3.4$  Hz, 1H), 2.29 (s, 3H), 1.98 (s, 3H), 1.33 – 1.20 (m, 6H);  $^{13}\text{C}\{^1\text{H}\}$  NMR (126 MHz,  $\text{CDCl}_3$ )  $\delta$  172.1, 172.0, 171.4, 139.5, 136.4, 135.4, 132.9, 125.2, 122.6, 122.0, 121.2, 119.6, 119.4, 119.2, 119.1, 118.5, 111.6, 110.6, 109.9, 101.7, 64.9, 61.8, 59.6, 54.6, 41.8, 37.4, 32.3, 26.5, 23.8, 22.8, 14.4; **HRMS-ESI**:  $m/z$   $[M+H]^+$  Calcd for  $C_{31}H_{35}N_2O_6$  531.2490; Found: 531.2494.

The substitute alkyl chain on pyrrolo[1,2-*a*]indole core and methyl group (3 and 3') on indole ring of hetero dimer determined by the comparison of the following  $^1\text{H NMR}$  data of **3a**, **4a** and **4g** and  $^1\text{H}-^1\text{H}$  COSY and NOESY NMR of **4g**.

<sup>1</sup>HNMR comparison of **3a**, **4a** and **4g**:

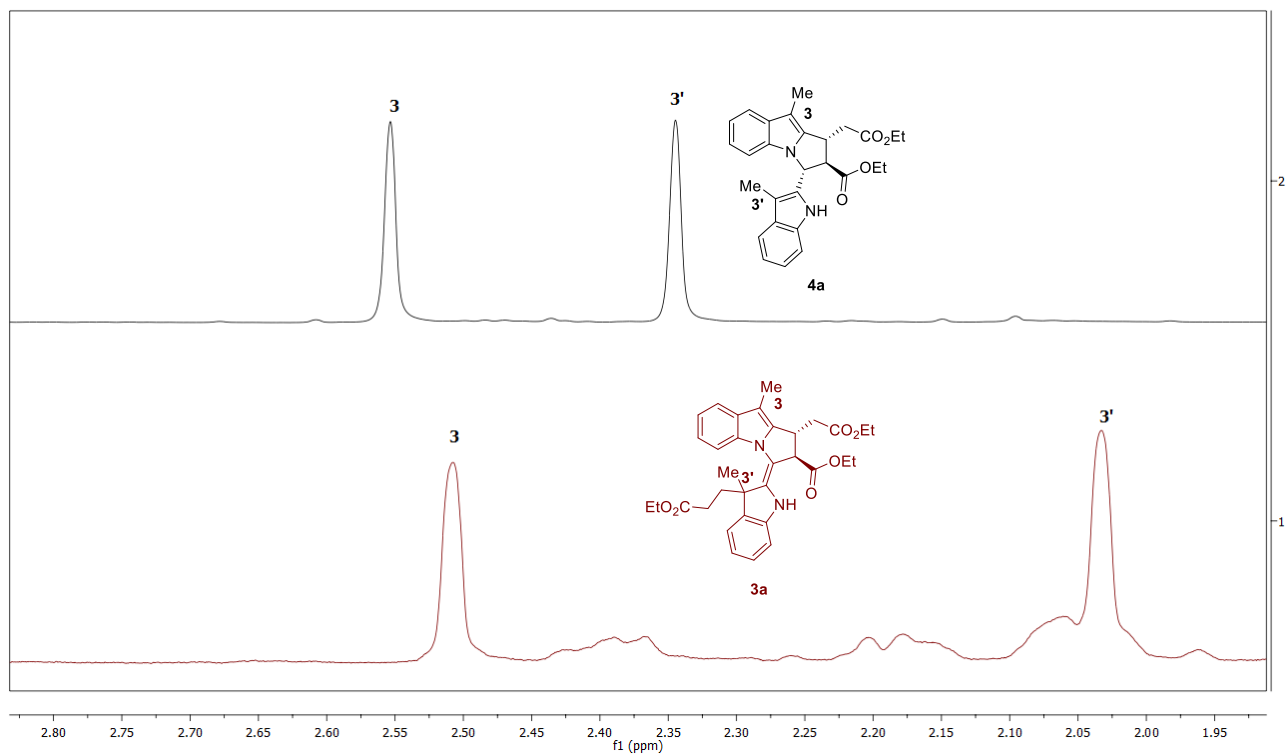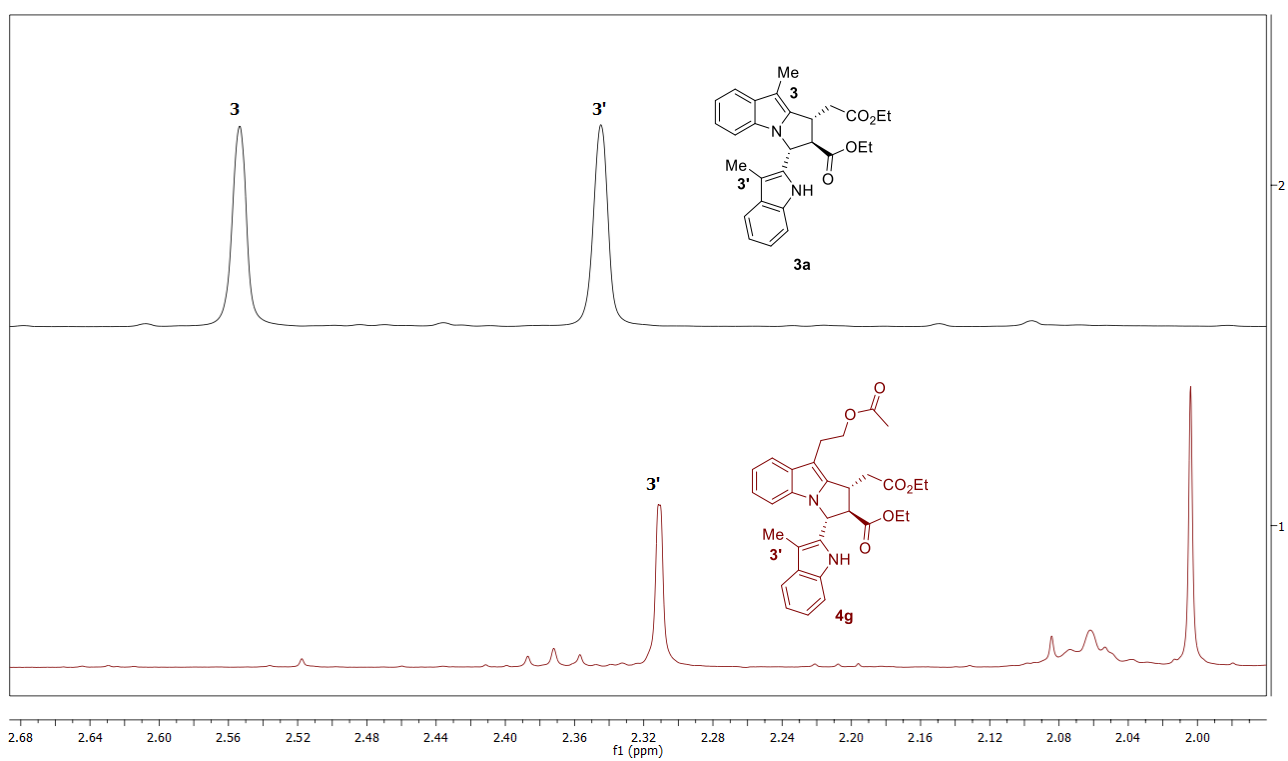

### $^1\text{H}$ - $^1\text{H}$ COSY NMR spectrum of compound **4g**

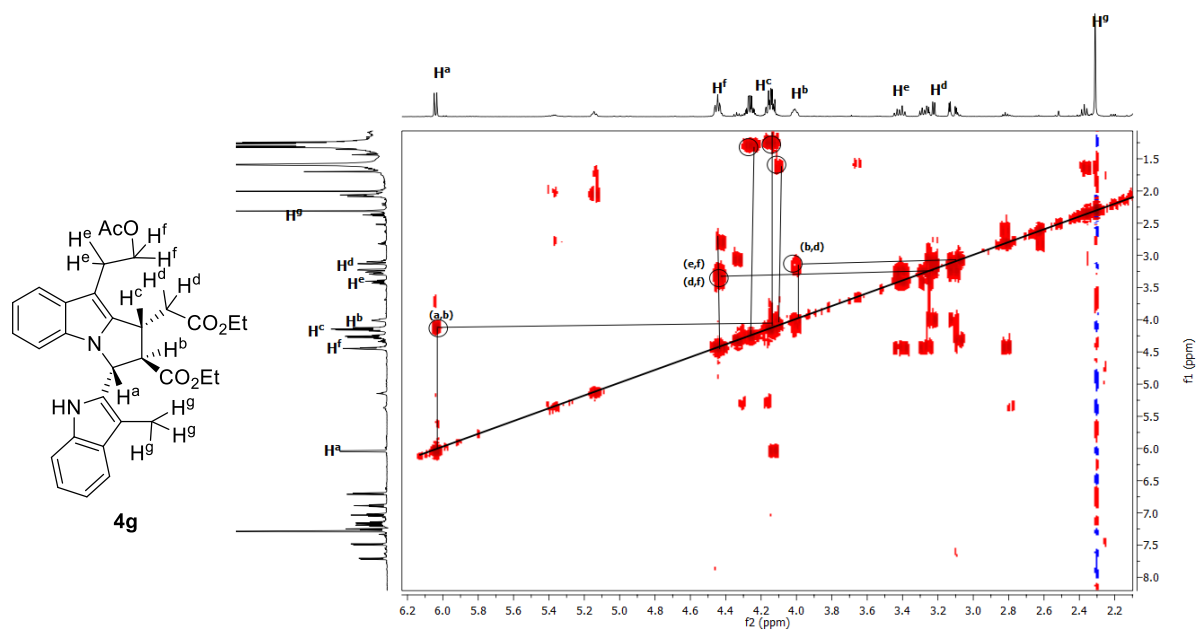

### $^1\text{H}$ - $^1\text{H}$ NOESY NMR spectrum of compound **4g**

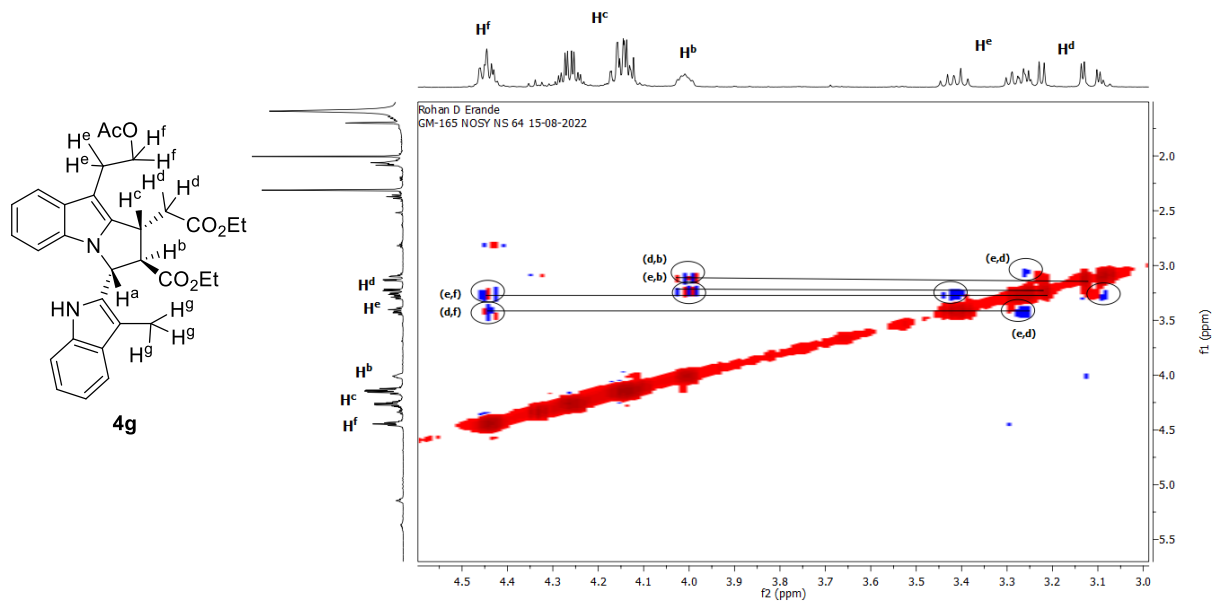

### Synthesis of compound **9**<sup>11</sup>

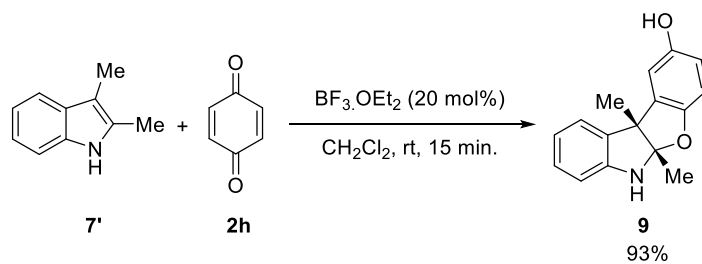

The title compound **9** was prepared from 2,3-dimethyl indole **7'** (50 mg 0.344 mmol, 1.0 equiv.),  $\text{BF}_3 \cdot \text{OEt}_2$  (20 mol%) and 1,4-benzoquinone **2h** (56 mg, 0.516 mmol, 1.5 equiv.) according to general procedure **E** with a reaction time of 15 minutes. The crude residue was purified by column chromatography on silica gel with an eluent of hexanes to EtOAc/hexanes (1/4) to furnish the title compound **9** (81 mg, 0.320 mmol, 93%) as a white solid;  $R_f=0.2$  (EtOAc/hexane 2/3); Spectral data were in agreement with those reported<sup>11</sup>;  $^1\text{H NMR}$  (500 MHz,  $\text{CDCl}_3$ )  $\delta$  7.14 (d,  $J = 7.4$  Hz, 1H), 7.03 (t,  $J = 7.5$  Hz, 1H), 6.81 (d,  $J = 2.5$  Hz, 1H), 6.77 (t,  $J = 7.5$  Hz, 1H), 6.61 (d,  $J = 7.7$  Hz, 1H), 6.57 (d,  $J = 8.5$  Hz, 1H), 6.52 (dd,  $J = 8.3, 2.6$  Hz, 1H), 4.90 (d,  $J = 125.0$  Hz, 2H), 1.65 (s, 3H), 1.56 (s, 3H);  $^{13}\text{C}\{^1\text{H}\}$  NMR (126 MHz,  $\text{CDCl}_3$ )  $\delta$  151.6, 150.1, 146.5, 134.7, 133.7, 128.2, 123.0, 119.9, 116.3, 114.6, 110.7, 109.8, 109.2, 57.1, 21.2, 21.0.

## 8. Single Crystal X-Ray Analysis

### 8.1 X-ray crystallographic data of compound **3c**

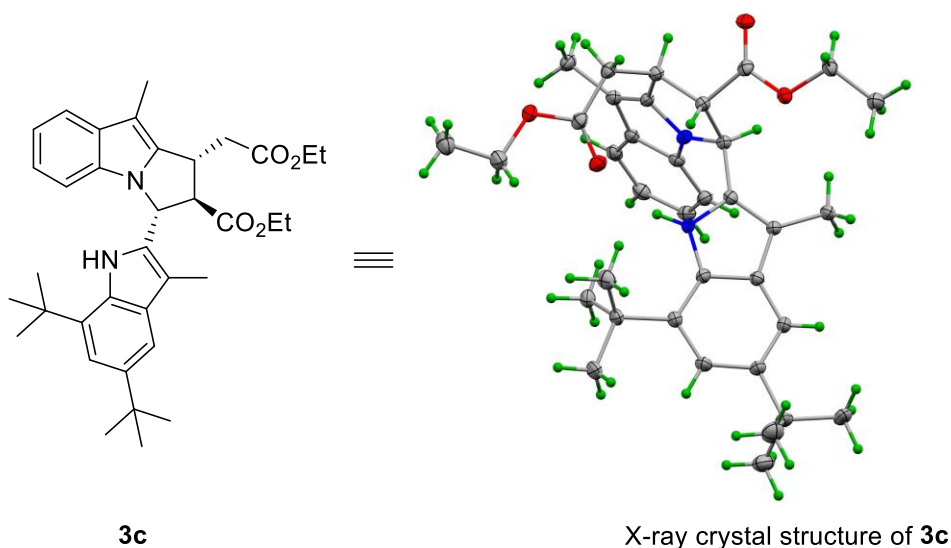

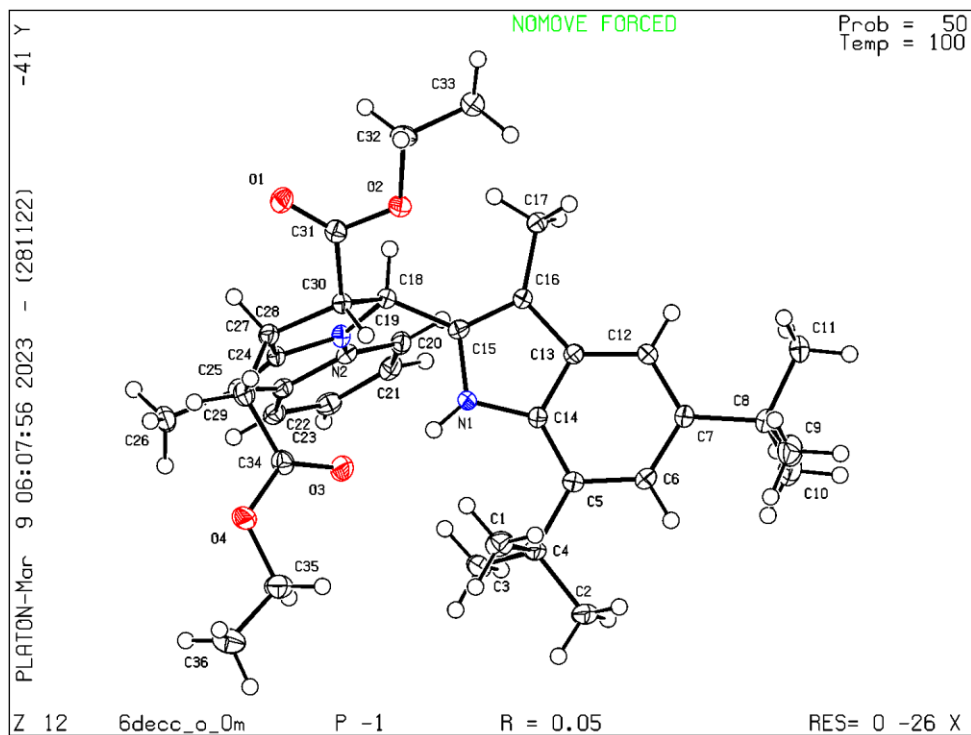

**Figure S1** Crystal data and structure refinement for compound **3c**

**Table S1.** Data Collection and Structure Refinement Parameters for Compound **3c**

|                   |                                                               |
|-------------------|---------------------------------------------------------------|
| Empirical formula | C <sub>36</sub> H <sub>46</sub> N <sub>2</sub> O <sub>4</sub> |
| Formula weight    | 570.75                                                        |
| Temperature/K     | 100                                                           |
| Crystal system    | triclinic                                                     |
| Space group       | P-1                                                           |
| <i>a</i> /Å       | 8.3075(3)                                                     |
| <i>b</i> /Å       | 10.5823(3)                                                    |
| <i>c</i> /Å       | 19.6489(7)                                                    |
| <i>α</i> /deg     | 98.1600(10)                                                   |

|                                             |                                                               |
|---------------------------------------------|---------------------------------------------------------------|
| $\beta$ /deg                                | 91.3010(10)                                                   |
| $\gamma$ /deg                               | 111.1680(10)                                                  |
| Volume/Å <sup>3</sup>                       | 1589.39(9)                                                    |
| Z                                           | 2                                                             |
| $\rho_{\text{calc}}/\text{cm}^3$            | 1.193                                                         |
| $\mu/\text{mm}^{-1}$                        | 0.077                                                         |
| F(000)                                      | 616.0                                                         |
| Crystal size/mm <sup>3</sup>                | 0.5 × 0.2 × 0.1                                               |
| Radiation                                   | MoK $\alpha$ ( $\lambda = 0.71073$ )                          |
| 2 $\Theta$ range for data collection/°      | 4.182 to 56.922                                               |
| Index ranges                                | -10 ≤ h ≤ 11, -14 ≤ k ≤ 14, -26 ≤ l ≤ 26                      |
| Reflections collected                       | 27606                                                         |
| Independent reflections                     | 7957 [R <sub>int</sub> = 0.0402, R <sub>sigma</sub> = 0.0455] |
| Data/restraints/parameters                  | 7957/0/389                                                    |
| Goodness-of-fit on F <sup>2</sup>           | 1.032                                                         |
| Final R indexes [I ≥ 2σ(I)]                 | R <sub>1</sub> = 0.0507, wR <sub>2</sub> = 0.1179             |
| Final R indexes [all data]                  | R <sub>1</sub> = 0.0745, wR <sub>2</sub> = 0.1312             |
| Largest diff. peak/hole / e Å <sup>-3</sup> | 0.38/-0.27                                                    |

$${}^a R_1 = \Sigma(|F_o| - |F_c|) / \Sigma |F_o|. \quad {}^b wR_2 = \{\Sigma[w(|F_o|^2 - |F_c|^2)^2] / \Sigma[w(|F_o|^2)^2]\}^{1/2}$$



## 8.2 X-ray crystallographic data of compound 4a

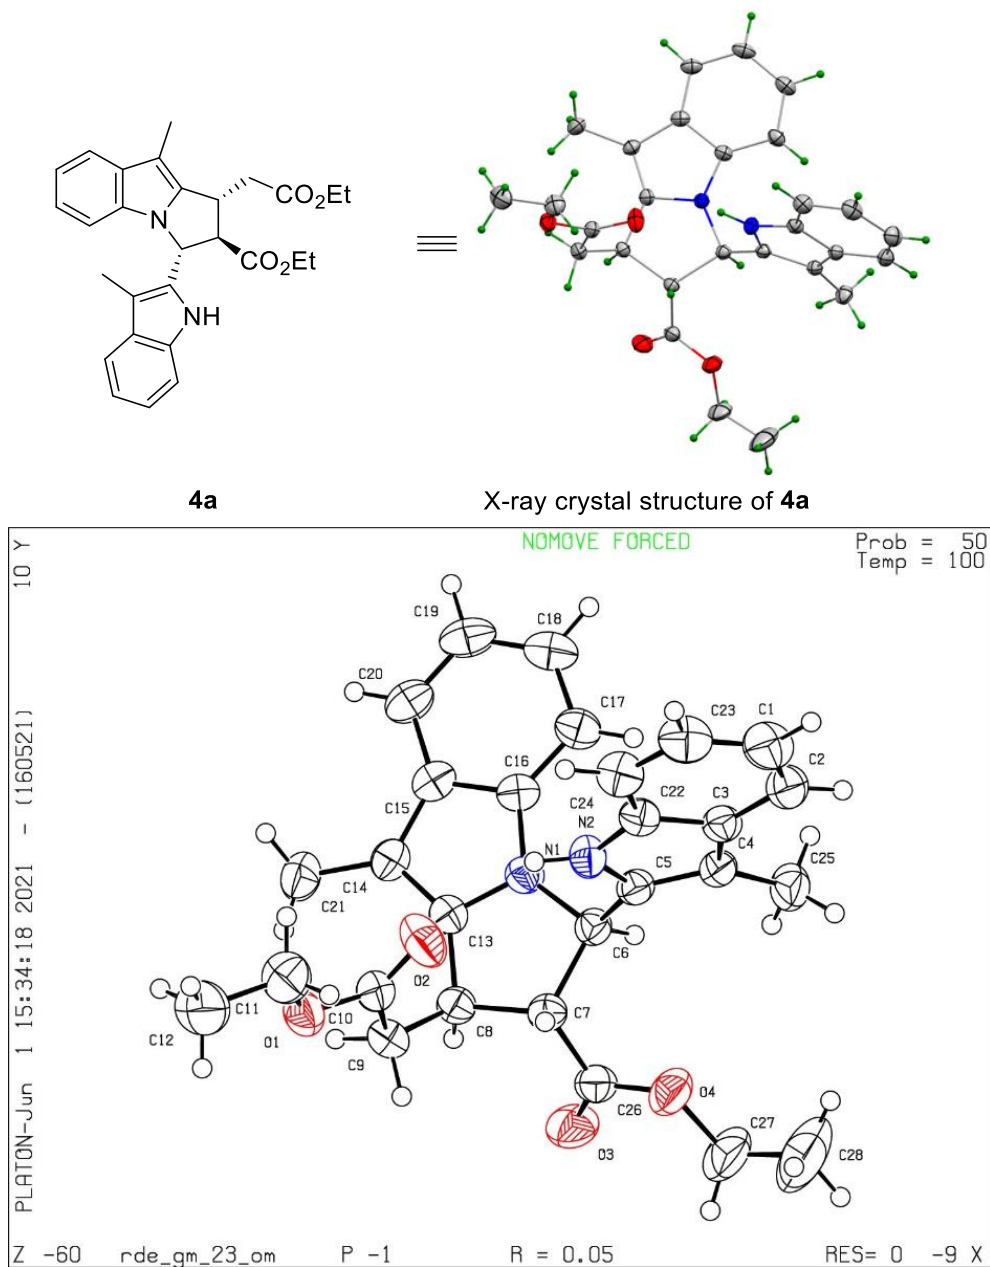

**Figure S2.** Crystal data and structure refinement for compound **4a**



**Table S2.** Data Collection and Structure Refinement Parameters for Compound **4a**

|                                                                                                                     |                                                                                                           |
|---------------------------------------------------------------------------------------------------------------------|-----------------------------------------------------------------------------------------------------------|
| Empirical formula                                                                                                   | C <sub>28</sub> H <sub>30</sub> N <sub>2</sub> O <sub>4</sub>                                             |
| Formula weight                                                                                                      | 458.54                                                                                                    |
| Crystal color, habit                                                                                                | colorless, block                                                                                          |
| <i>T</i> / K                                                                                                        | 100(2)                                                                                                    |
| Crystal system                                                                                                      | Triclinic                                                                                                 |
| Space group                                                                                                         | <i>P</i> -1 (no. 14)                                                                                      |
| <i>a</i> /Å                                                                                                         | 8.3294(19)                                                                                                |
| <i>b</i> /Å                                                                                                         | 9.907(2)                                                                                                  |
| <i>c</i> /Å                                                                                                         | 16.337(4)                                                                                                 |
| $\alpha$ /°                                                                                                         | 75.760(3)                                                                                                 |
| $\beta$ /°                                                                                                          | 78.824(3)                                                                                                 |
| $\gamma$ /°                                                                                                         | 69.309(3)                                                                                                 |
| <i>V</i> /Å <sup>3</sup>                                                                                            | 1213.9(5)                                                                                                 |
| <i>Z</i>                                                                                                            | 2                                                                                                         |
| <i>D</i> <sub>c</sub> /g cm <sup>-3</sup>                                                                           | 1.255                                                                                                     |
| $\mu$ /mm <sup>-1</sup>                                                                                             | 0.084                                                                                                     |
| Reflections measured                                                                                                | 30389                                                                                                     |
| Unique reflections/ <i>R</i> <sub>int</sub>                                                                         | 5317/ 0.1345                                                                                              |
| <i>R</i> ( <i>F</i> ) [ <i>I</i> > 2σ( <i>I</i> )]                                                                  | 3728                                                                                                      |
| <i>R</i> <sub>1</sub> <sup><i>a</i></sup> , <i>wR</i> <sub>2</sub> <sup><i>b</i></sup> [ <i>I</i> > 2σ( <i>I</i> )] | <i>R</i> <sub>1</sub> = 0.0486 <sup><i>a</i></sup><br><i>wR</i> <sub>2</sub> = 0.1193 <sup><i>b</i></sup> |
| <i>R</i> <sub>1</sub> <sup><i>a</i></sup> , <i>wR</i> <sub>2</sub> <sup><i>b</i></sup> (all data)                   | <i>R</i> <sub>1</sub> = 0.0743 <sup><i>a</i></sup><br><i>wR</i> <sub>2</sub> = 0.1345 <sup><i>b</i></sup> |
| GOF on <i>F</i> <sup>2</sup>                                                                                        | 1.032                                                                                                     |

## checkCIF/PLATON report

Structure factors have been supplied for datablock(s) rde\_gm\_23\_om

THIS REPORT IS FOR GUIDANCE ONLY. IF USED AS PART OF A REVIEW PROCEDURE FOR PUBLICATION, IT SHOULD NOT REPLACE THE EXPERTISE OF AN EXPERIENCED CRYSTALLOGRAPHIC REFEREE.

No syntax errors found. [CIF dictionary](#) [Interpreting this report](#)

### Datablock: rde\_gm\_23\_om

---

Bond precision: C-C = 0.0030 A Wavelength=0.71073

Cell: a=8.3294(19) b=9.907(2) c=16.337(4)  
alpha=75.760(3) beta=78.824(3) gamma=69.309(3)

Temperature: 100 K

|                | Calculated    | Reported      |
|----------------|---------------|---------------|
| Volume         | 1213.9(5)     | 1213.9(5)     |
| Space group    | P -1          | P -1          |
| Hall group     | -P 1          | -P 1          |
| Moiety formula | C28 H30 N2 O4 | C28 H30 N2 O4 |
| Sum formula    | C28 H30 N2 O4 | C28 H30 N2 O4 |
| Mr             | 458.54        | 458.54        |
| Dx, g cm-3     | 1.255         | 1.254         |
| Z              | 2             | 2             |
| Mu (mm-1)      | 0.084         | 0.084         |
| F000           | 488.0         | 488.0         |
| F000'          | 488.22        |               |
| h, k, lmax     | 10, 12, 20    | 10, 12, 20    |
| Nref           | 5337          | 5317          |
| Tmin, Tmax     | 0.995, 0.997  | 0.660, 0.746  |
| Tmin'          | 0.992         |               |

Correction method= # Reported T Limits: Tmin=0.660 Tmax=0.746  
AbsCorr = MULTI-SCAN

Data completeness= 0.996 Theta(max)= 27.055

R(reflections)= 0.0486( 3728) wR2(reflections)= 0.1345( 5317)

S = 1.032 Npar= 319

---

The following ALERTS were generated. Each ALERT has the format  
**test-name ALERT alert-type alert-level.**  
Click on the hyperlinks for more details of the test.

## 9. Biological Evaluation

**Table S3.** *In silico* MptpB binding affinity prediction of synthesized of Pyrrolo[1,2-a]indole derivatives. MptpB binding affinity prediction of one previously reported MptpB inhibitor (OMTS) was also considered as the positive control.

| Name of Ligands            | Binding Free Energy (Kcal/Mol) | pK <sub>a</sub> (-logK <sub>a</sub> ) | MM/PB(GB)SA Free Energy (Kcal/Mol) |
|----------------------------|--------------------------------|---------------------------------------|------------------------------------|
| 3a                         | -8.6                           | 7.62                                  | -43.32                             |
| 3b                         | -9.2                           | 6.71                                  | -42.59                             |
| 3c                         | -8.7                           | 7.74                                  | -44.59                             |
| 3d                         | -8.9                           | 7.19                                  | -43.28                             |
| 3e                         | -9.6                           | 8.93                                  | -59.12                             |
| 3f                         | -9.0                           | 9.96                                  | -58.44                             |
| 3g                         | -9.9                           | 9.09                                  | -59.61                             |
| 4a                         | -8.4                           | 6.85                                  | -35.15                             |
| 4b                         | -8.4                           | 7.17                                  | -45.76                             |
| 4c                         | -8.6                           | 7.09                                  | -50.68                             |
| 4d                         | -9.0                           | 7.92                                  | -54.79                             |
| 4e                         | -8.6                           | 7.59                                  | -41.57                             |
| 4f                         | -9.5                           | 5.53                                  | -23.13                             |
| 4g                         | -9.5                           | 7.54                                  | -50.41                             |
| 5a                         | -10.3                          | 7.85                                  | -38.86                             |
| 5b                         | -9.4                           | 8.24                                  | -52.77                             |
| 5c                         | -8.6                           | 8.91                                  | -48.1                              |
| 5d                         | -9.8                           | 8.54                                  | -51.86                             |
| 6                          | -6.3                           | 4.81                                  | -20.76                             |
| 7                          | -6.7                           | 3.47                                  | -22.22                             |
| 8                          | -7.6                           | 6.06                                  | -31.71                             |
| 9                          | -8.0                           | 4.67                                  | -18.45                             |
| OMTS<br>(Positive Control) | -9.2                           | 5.99                                  | -44.45                             |

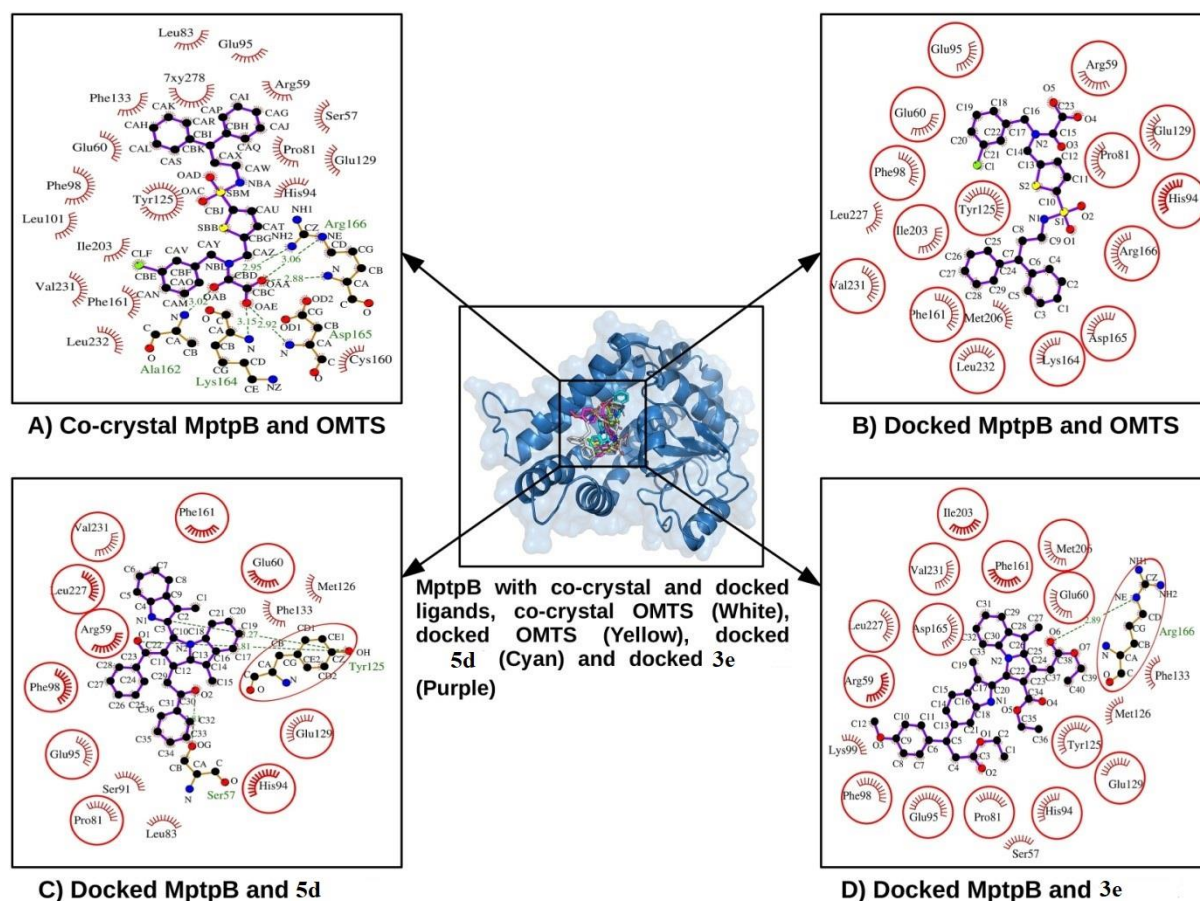

**Figure S3. Fidelity of the docking experiment and comparative MptpB binding profiles of synthesized Pyrrolo[1,2-a]indole derivatives (5d, 3e) along with prior reported MptpB substrate competitive inhibitor, OMTS.** The central figure represents the structural glimpse of MptpB with bound ligands (5d, 3e and OMTS). The boxed figures (A,B,C,D) represent 2D interaction profile of MptpB bound (co-crystallized or docked) ligands with the active site amino acid residues. The encircled amino acid residues in Figure S3.B, Figure S3.C and Figure S3.D represent the engagement of identical active site amino acid residues of MptpB which are previously found to interact with co-crystallized ligand OMTS. Figure A The engagement of identical sets of amino acids in FigA and Fig S3.B for the same ligand OMTS which is either co-crystallized (Figure S3 A) or blind docked (Figure S3.B) justifies the fidelity of docking experiment. Likewise, the engagement of similar sets of amino acids in Figure S3 C and Figure.S3 D as compared with Figure.S3 A suggests that the synthesized Pyrrolo[1,2-a]indole derivatives 5d, and 3e may also act as substrate competitive inhibitor of MptpB. Spiked arches represent the hydrophobic interactions while the green dotted line represent the formation of hydrogen bonds.

#### Methodology:

2D structure of the all molecules in the library from pyrrolo indole derivatives were drawn using a freely available online tool named ChemDraw from PerkinElmer Informatics (<https://chemdrawdirect.perkinelmer.cloud/js/sample/index.html>) followed by the conversion into 3D SDF format using open babel software.<sup>12</sup> Further these ligands were converted into PDB followed by conversion into PDBQT format by using PyMol (The PyMOL Molecular Graphics System, Version 1.2r3pre, Schrödinger, LLC ) and AutoDock Tools 1.5.6.<sup>13</sup> Mycobacterial protein tyrosine phosphatase B (MptpB) 3D structure (PDB ID: 2OZ5)<sup>14</sup> was downloaded from protein data bank RCSB website<sup>15</sup> and associated ligands and water molecules were removed using PyMol. The AutodockVina was used for molecular docking and AutoDock Tools 1.5.6 for protein and ligand preparation for docking. The Kollman charges and polar hydrogen were added followed by converting to PDBQT format. In order to perform blind docking grid box was prepared to cover up whole protein, box size of 1Å with spacing 54x66x56. Post docking, the binding affinity of the best pose of the ligands out of nine possible binding sites was calculated using online server KDEEP.<sup>16</sup> The interaction profile of ligand with protein and binding poses were analyzed by using PyMol and Ligplot.<sup>17</sup> To study the stability of the bound ligand with the MptpB protein we have performed the

molecular dynamic simulation (MD simulation) study. Alone MtpB and MtpB docked with ligands (**5d** and **3e**) were simulated to understand the stability behavior of the protein in physiologically simulated conditions in presence of ligands. All the MD simulation was perform using NAMD 2.14 software.<sup>18</sup> VMD (visual Molecular Dynamics) was used to protein and ligand preparation and results analysis.<sup>19</sup> Best pose of the ligand, post docking study by autodokvina and protein PDBQT format was used as a complex for simulation file preparation. modeler tools<sup>20</sup> was used to generate force field and topology files of ligands such as ligandrm.psf and ligandrm.pdb. The ligand and protein structure complex were solvated with a boundary of 5Å cubic cell and langevin dynamics were applied to generate isothermal–isobaric ensemble environment for simulation. The simulation was performed for 30ns with a 2 femto second time step per cycles. The energy minimization of the system was done for 1000 steps and the steps for dcd, xst, and restart frequency was set to 5000 steps and output energy to 50 steps. To study the change in conformation of the alone protein and protein with ligands RMSD profile was analyzed using VMD tools. Since Molecular Mechanics/Poisson Boltzmann Surface area and Molecular Mechanics/Generalized Born surface area are the two well evaluated methods for ranking docked poses hence to be double sure and increase the probability of the prediction and scoring function we have done the free energy calculation based on MM/PB(GB)SA method. Here we have applied fastDRH, a web server to re-score the docked poses that apply AmberTools17 for free energy calculation. Here, we have chosen ff19SB force field for receptor and GAFF2 for ligand and we consider the score of GB8 method due to higher success rate.<sup>21</sup> All the data are plotted using origin software (Origin, Version 2022. OriginLab Corporation, Northampton, MA, USA.).

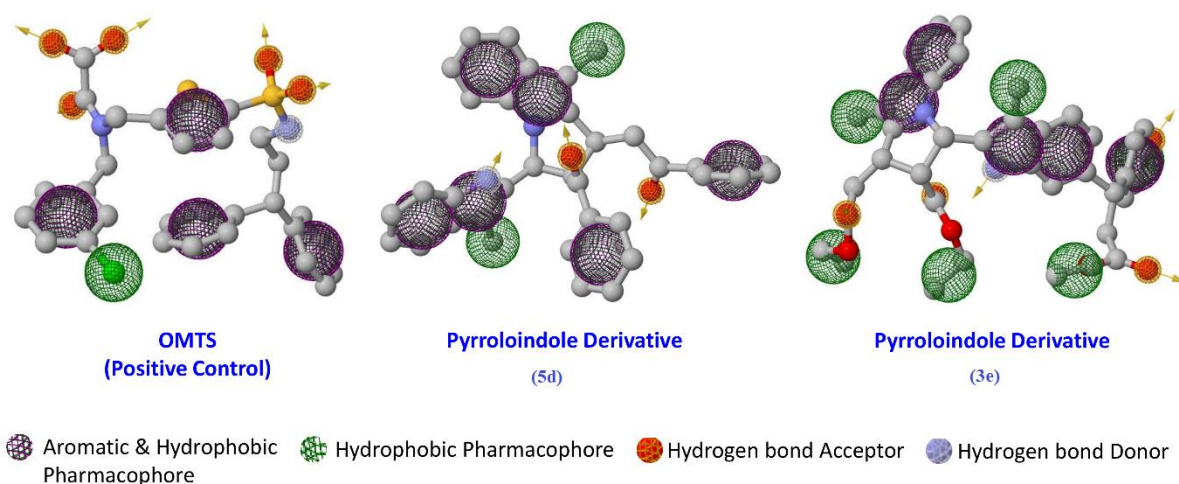

**Figure S4. Pictorial view of similarity in pharmacophore of control ligand (OMTS) and pyrroloindole derivatives**

OMTS is potentially binding at the active site of MtpB and considered as a potential inhibitor of this mycobacterial drug target protein. Our synthesized pyrroloindole derivatives have the similar pharmacophore as OMTS so it gives a hunch that these molecules may also bind and inhibit MtpB. Taking pharmacophoric similarity in consideration, using *in silico* approaches we have extended our study to screen these derivatives as potential lead molecules against MtpB.

## 10. Computational Details

In order to gain an understanding of the mechanism behind the novel  $\text{BF}_3 \cdot \text{OEt}_2$  catalyzed cascade reaction, we propose a reaction as depicted in Scheme 2. Initially, the formation of product **3a'** was expected over the reaction between the indole ester **1a** and ethyl acrylate **2a**. However, the experiment resulted in the formation of a self-dimerized intermediate **4a**, eventually producing the product **3a**. To understand the reaction mechanism and to know the reason behind the formation of **3a** instead of anticipated product **3a'**, density functional theory (DFT) electronic structure calculations were carried out. Geometry optimization was performed at the B3LYP/def2-SVP level of theory followed by single point calculations for the optimized structures at B3LYP/def2-TZVP were completed using ORCA package.<sup>22-26</sup> Solvation effects were also considered throughout the calculations using the CPCM (Conductor-like Polarizable Continuum Model) implicit model.<sup>27</sup> As seen in Figure S5, the barrier height for TS 1 is 43.8 kcal/mol and the energy of **3a'** is 5.6 kcal/mol below the reactants. This shows that the formation of **3a'** is neither kinetically nor thermodynamically favoured. Hence, the potential energy profile presenting the detailed mechanism for the formation of self-dimerization adduct **4a** and its reaction with ethyl acrylate **2a** to give substituted pyrrolo[1,2-*a*]indoles **3a** was computed and provided in Figures 2 and SI-3, respectively. The transition state (1a-TS 1) for the formation of self-dimer **4a** has a barrier height of 33.4 kcal/mol leading to the formation of a stable intermediate 1a-IM 1 followed by the keto-enol tautomerism.

It was anticipated that the indole ester **1a** under  $\text{BF}_3 \cdot \text{OEt}_2$  conditions generates an unstable intermediate **A**, which subsequently undergoes [3+2] cycloaddition with another molecule of indole ester **1a** to generate self-dimerized adduct **4a**. Notably, the self-dimerization adduct **4a** was found to be highly stable, which lies at 36.9 kcal/mol below the reactants. Further reaction of self-dimer **4a** with ethyl acrylate **2a** led to the formation of **3a** with 12.6 kcal/mol of energy above the reactants. In addition, cross dimerization product **4g** (Figure S6) has also been observed in the experiments where an unstable **1c'** intermediate on reaction with **1a** undergoes [3+2] cycloaddition similar to the self-dimerization reaction process. Both the reactions follow a similar reaction mechanism approach, where there is a formation of five-membered ring. The energies for each transition state as well as the intermediates follows almost identical trend.

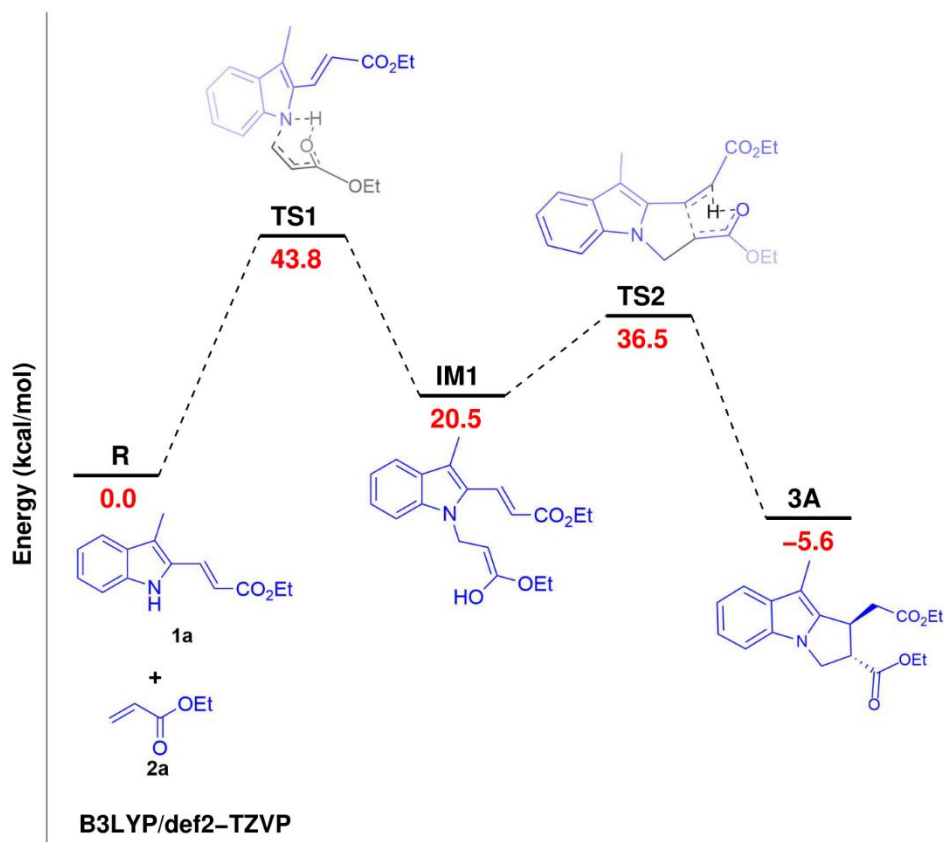

**Figure S5.** Potential energy profile for the expected product (**3A**). Energies are in kcal/mol.

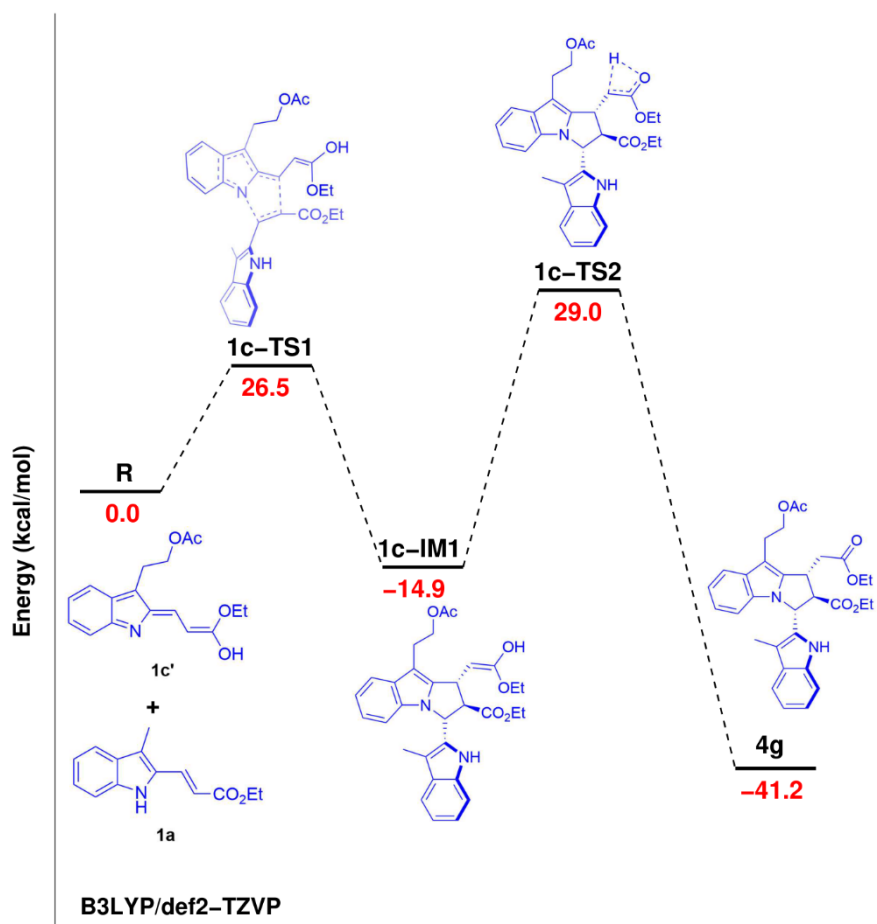

**Figure S6.** Potential energy profile for cross-dimerization (**4g**). Energies are in kcal/mol.

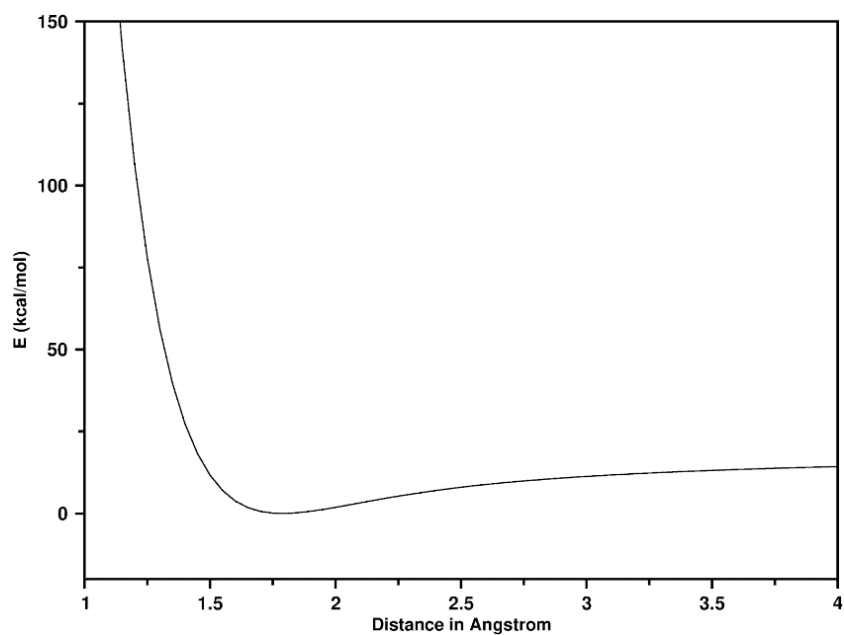

**Figure S7.** TS-Scan graph from addition of ethyl acrylate **2a** on dimer **4a** to the formation of molecule **3a**.

## References

- 1 D. H. Dethe, R. D. Erande and A. Ranjan, *J. Org. Chem.*, 2013, **78**, 10106–10120.
- 2 C. B. de Koning, J. P. Michael, R. Pathak and W. A. L. van Otterlo, *Tetrahedron Lett.*, 2004, **45**, 1117–1119.
- 3 B. Harish, S. Yadav and S. Suresh, *Chem. Commun.*, 2021, **57**, 231–234.
- 4 Y. Ye, Y. Suo, F. Yang, Y. Yang and L. Han, *J. Chem. Res.*, 2015, **39**, 296–299.
- 5 D. P. Zarezin, O. I. Shmatova, A. M. Kabylda and V. G. Nenajdenko, *Eur. J. Org. Chem.*, 2018, **2018**, 4716–4722.
- 6 D. H. Dethe, V. K. Boda and A. Mandal, *Eur. J. Org. Chem.*, 2018, **2018**, 5417–5421.
- 7 Y. Du, H.-Y. Huang, H. Liu, Y.-P. Ruan and P.-Q. Huang, *Synlett*, 2011, **2011**, 565–568.
- 8 B. Bajtos and B. L. Pagenkopf, *Org. Lett.*, 2009, **11**, 2780–2783.
- 9 K. Sharma, A. Iyer, K. Sengupta and H. Chakrapani, *Org. Lett.*, 2013, **15**, 2636–2639.
- 10 G. Obi and F. R. Van Heerden, *Synth. Commun.*, 2018, **48**, 1482–1486.
- 11 L. Zhang, J. Hu, R. Xu, S. Pan, X. Zeng and G. Zhong, *Adv. Synth. Catal.*, 2019, **361**, 5449–5457.
- 12 N. M. O’Boyle, M. Banck, C. A. James, C. Morley, T. Vandermeersch and G. R. Hutchison, *J. Cheminformatics*, 2011, **3**, 33.
- 13 O. Trott and A. J. Olson, *J. Comput. Chem.*, 2009, NA-NA.
- 14 C. Grundner, D. Perrin, R. Hooft van Huijsduijnen, D. Swinnen, J. Gonzalez, C. L. Gee, T. N. Wells and T. Alber, *Structure*, 2007, **15**, 499–509.
- 15 H. M. Berman, *Nucleic Acids Res.*, 2000, **28**, 235–242.
- 16 J. Jiménez, M. Škalič, G. Martínez-Rosell and G. De Fabritiis, *J. Chem. Inf. Model.*, 2018, **58**, 287–296.
- 17 R. A. Laskowski and M. B. Swindells, *J. Chem. Inf. Model.*, 2011, **51**, 2778–2786.
- 18 J. C. Phillips, D. J. Hardy, J. D. C. Maia, J. E. Stone, J. V. Ribeiro, R. C. Bernardi, R. Buch, G. Fiorin, J. Hémin, W. Jiang, R. McGreevy, M. C. R. Melo, B. K. Radak, R. D. Skeel, A. Singharoy, Y. Wang, B. Roux, A. Aksimentiev, Z. Luthey-Schulten, L. V. Kalé, K. Schulten, C. Chipot and E. Tajkhorshid, *J. Chem. Phys.*, 2020, **153**, 044130.
- 19 W. Humphrey, A. Dalke and K. Schulten, *J. Mol. Graph.*, 1996, **14**, 33–38.
- 20 S. Kim, J. Lee, S. Jo, C. L. Brooks, H. S. Lee and W. Im, *J. Comput. Chem.*, 2017, **38**, 1879–1886.
- 21 Z. Wang, H. Pan, H. Sun, Y. Kang, H. Liu, D. Cao and T. Hou, *Brief. Bioinform.*, 2022, **23**, bbac201.
- 22 F. Neese, *WIREs Comput. Mol. Sci.*, 2012, **2**, 73–78.
- 23 F. Neese, *WIREs Comput. Mol. Sci.*, 2018, **8**, e1327.
- 24 M. Orío, D. A. Pantazis and F. Neese, *Photosynth. Res.*, 2009, **102**, 443–453.
- 25 F. Neese and E. F. Valeev, *J. Chem. Theory Comput.*, 2011, **7**, 33–43.
- 26 G. L. Stoychev, A. A. Auer and F. Neese, *J. Chem. Theory Comput.*, 2017, **13**, 554–562.
- 27 M. Garcia-Ratés and F. Neese, *J. Comput. Chem.*, 2019, **40**, 1816–1828.



## 11. NMR spectra of new compounds 3a-3g, 4a-4f, 5a-5d and 6-9

### $^1\text{H}$ NMR (500 MHz, $\text{CDCl}_3$ ) of 3a

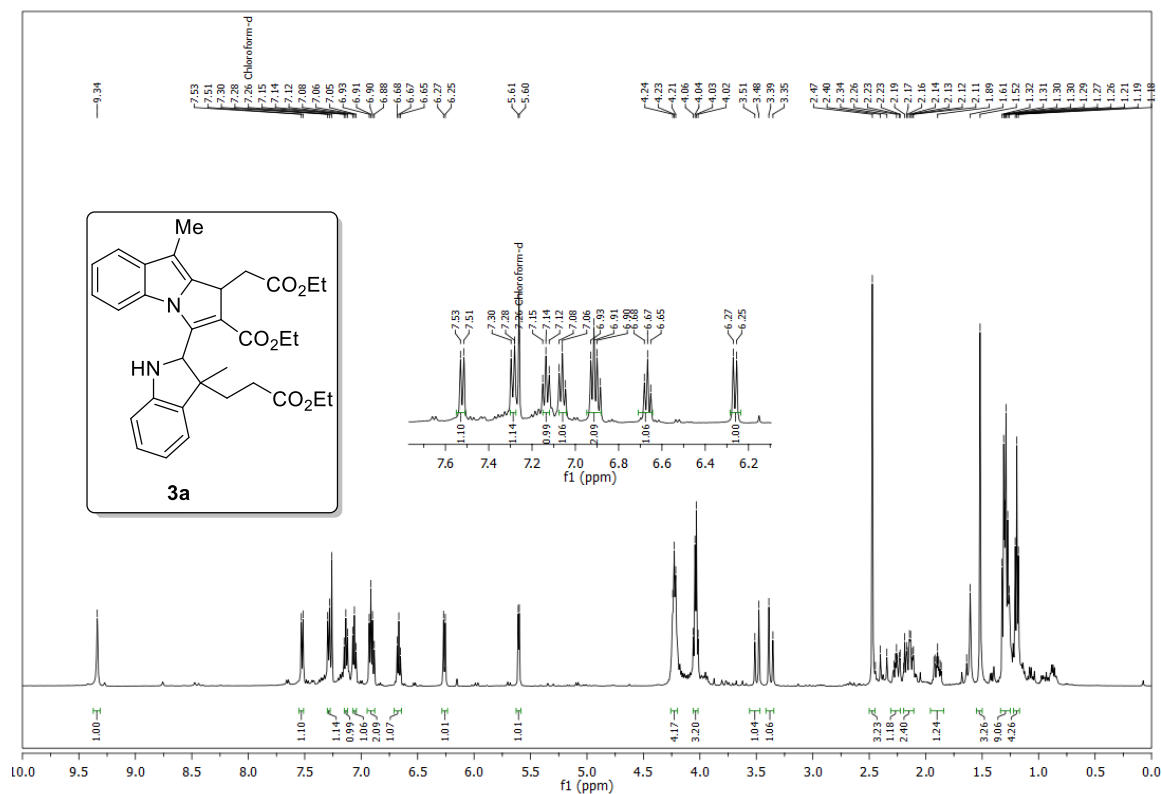

### $^{13}\text{C}\{^1\text{H}\}$ NMR (126 MHz, $\text{CDCl}_3$ ) of 3a

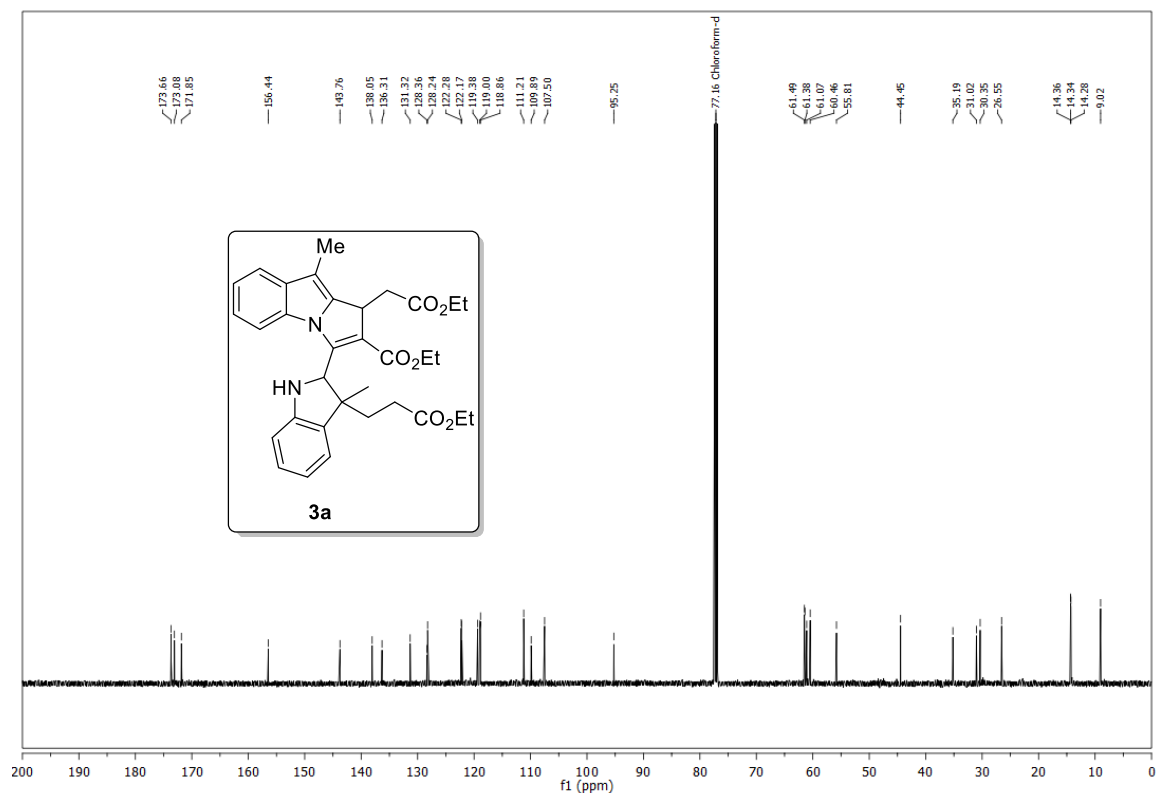

DEPT of 3a

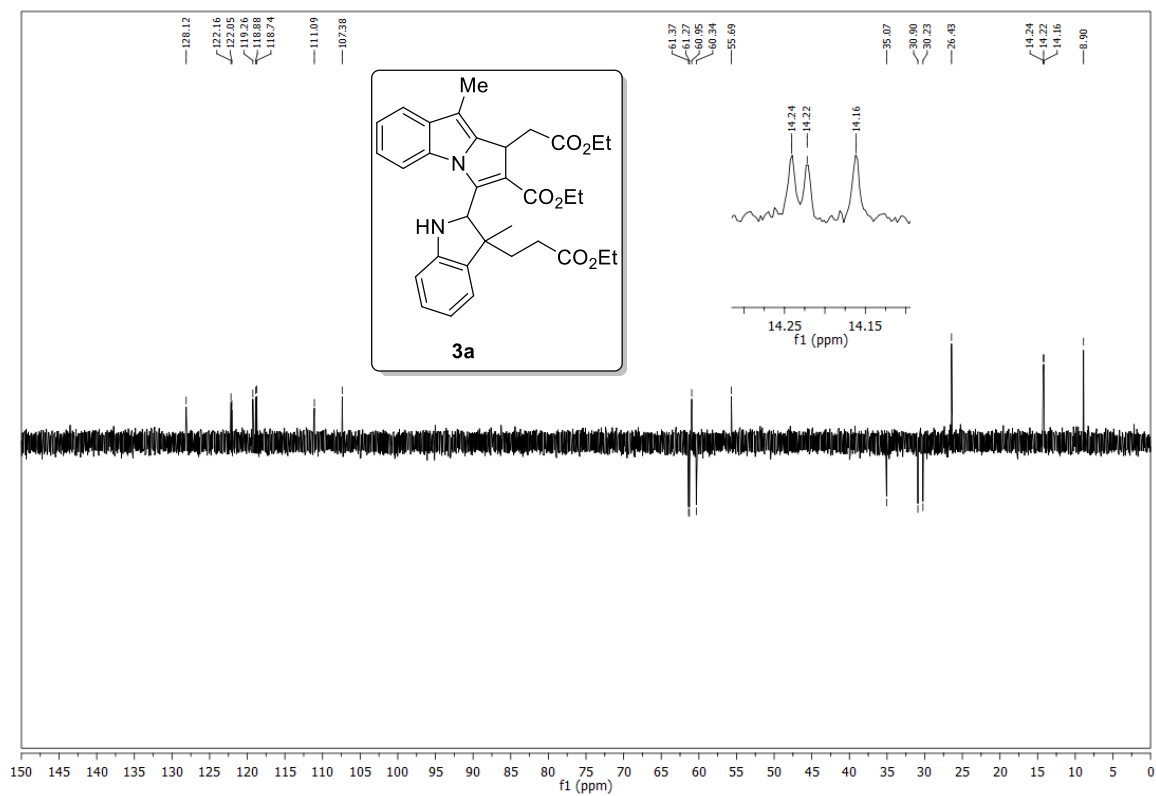

<sup>1</sup>H NMR (500 MHz, CDCl<sub>3</sub>) of 3b

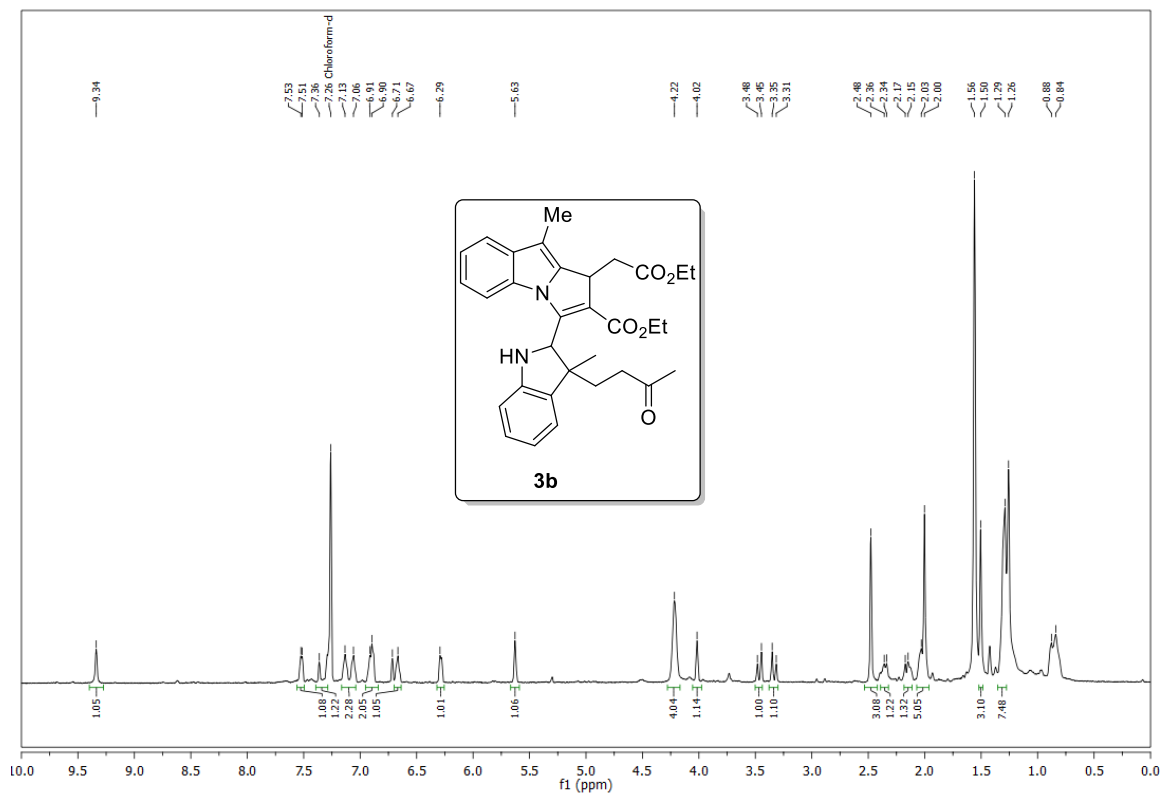

$^{13}\text{C}\{^1\text{H}\}$  NMR (126 MHz,  $\text{CDCl}_3$ ) of **3b**

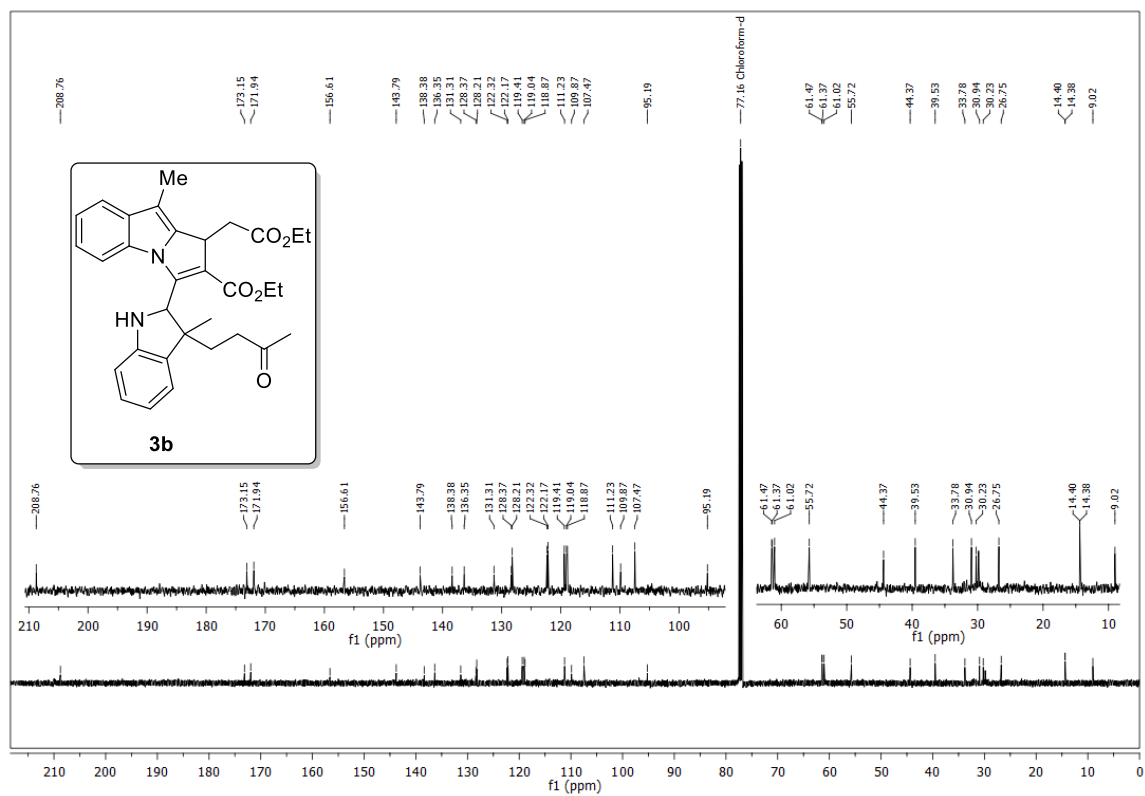

$^1\text{H}$  NMR (500 MHz,  $\text{CDCl}_3$ ) of **3c**

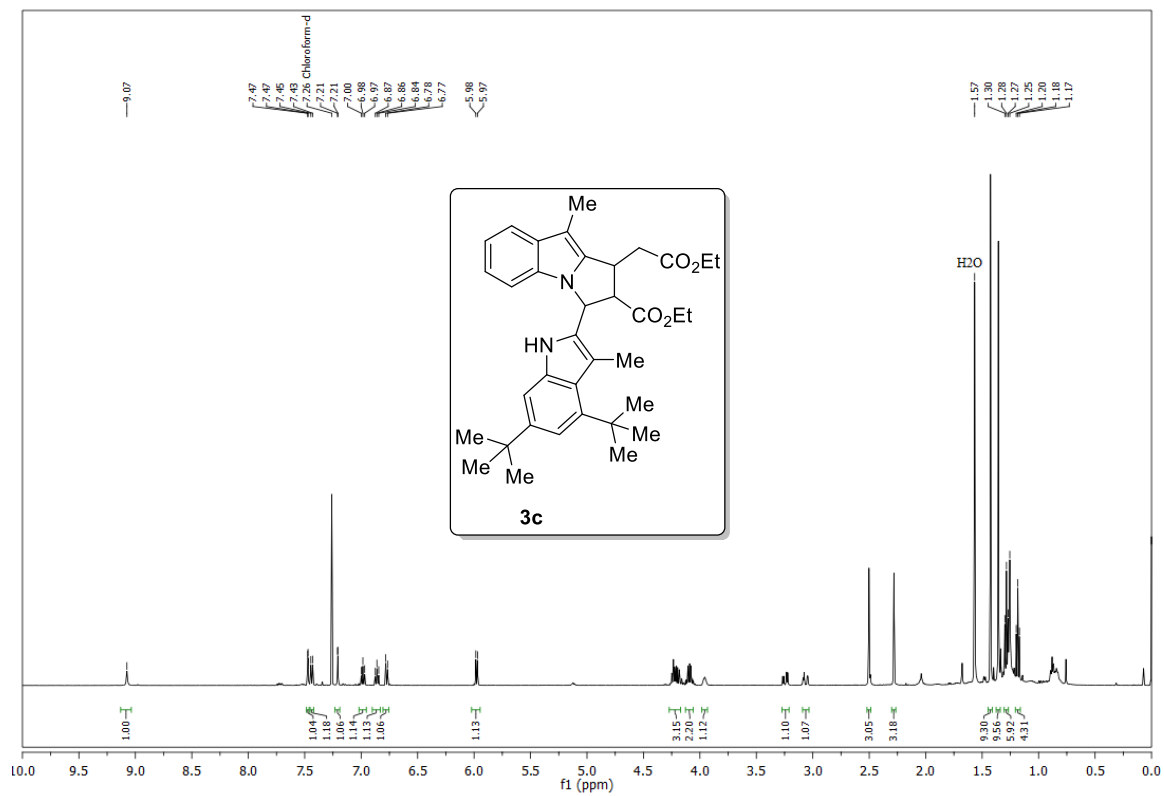

$^{13}\text{C}\{^1\text{H}\}$  NMR(126 MHz,  $\text{CDCl}_3$ ) of **3c**

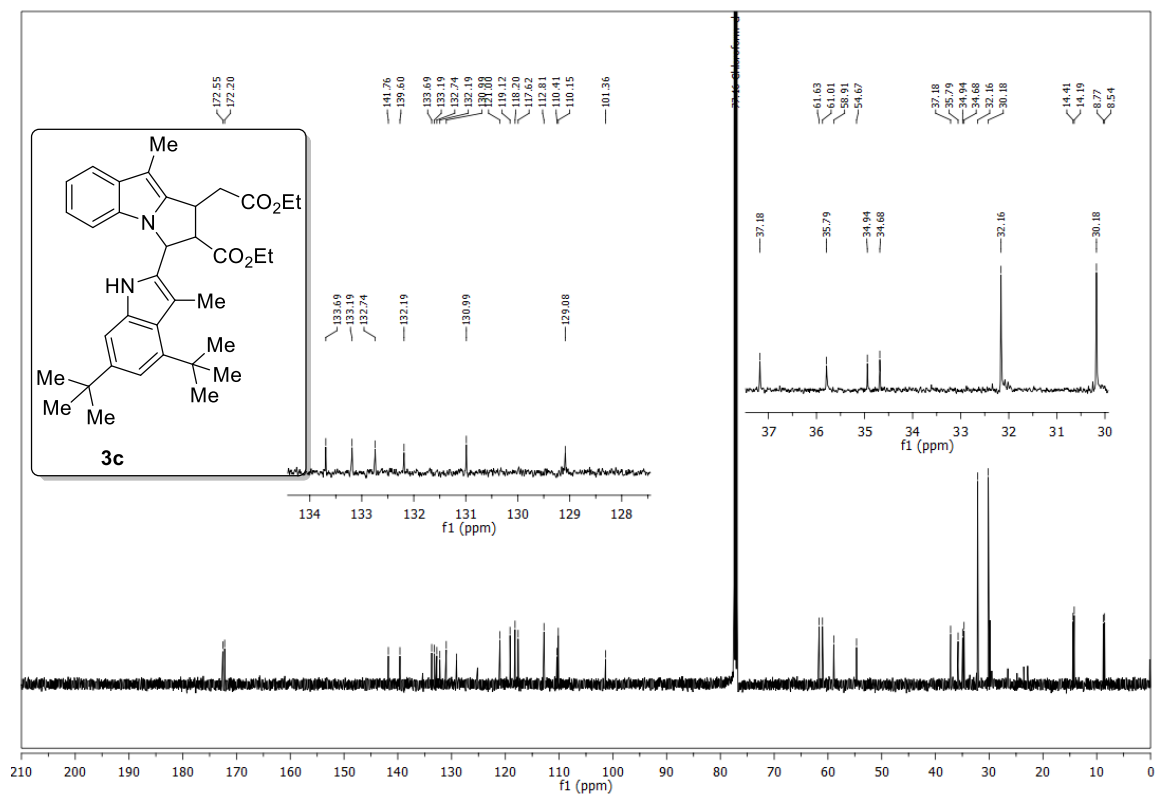

$^1\text{H}$  NMR (500 MHz,  $\text{CDCl}_3$ ) of **3d**

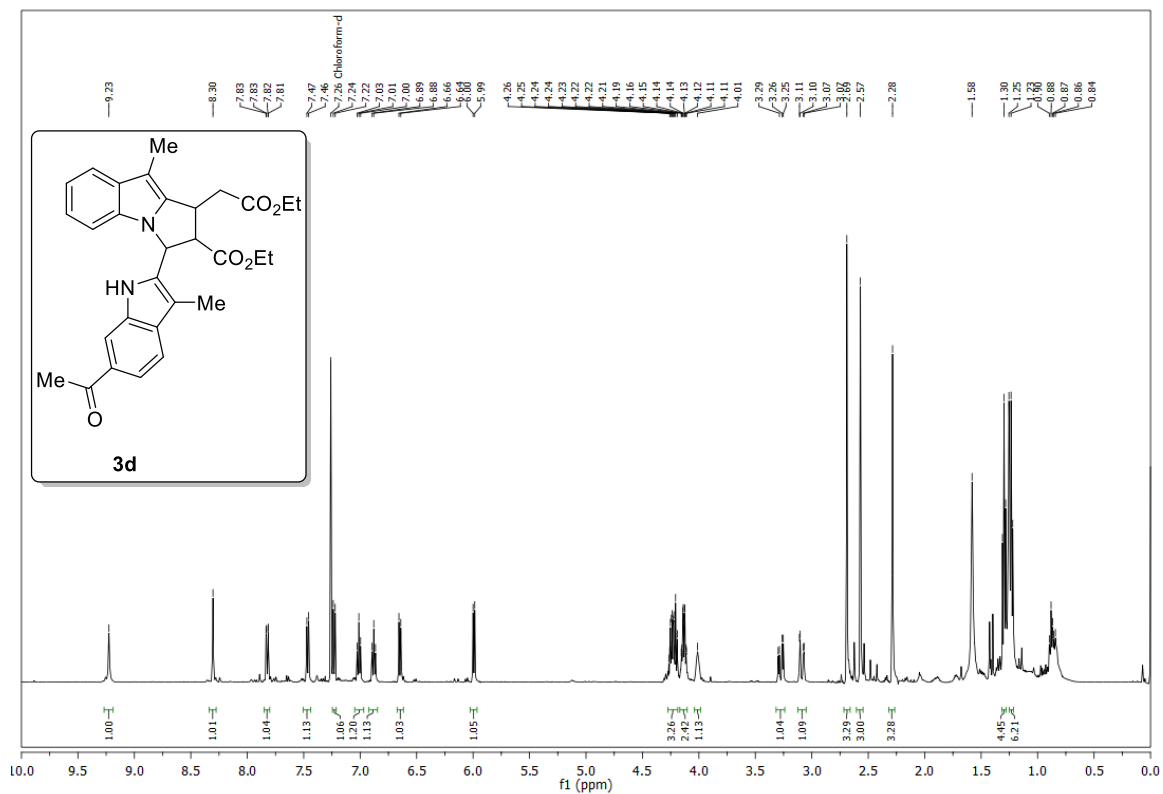

$^{13}\text{C}\{^1\text{H}\}$  NMR (126 MHz,  $\text{CDCl}_3$ ) of **3d**

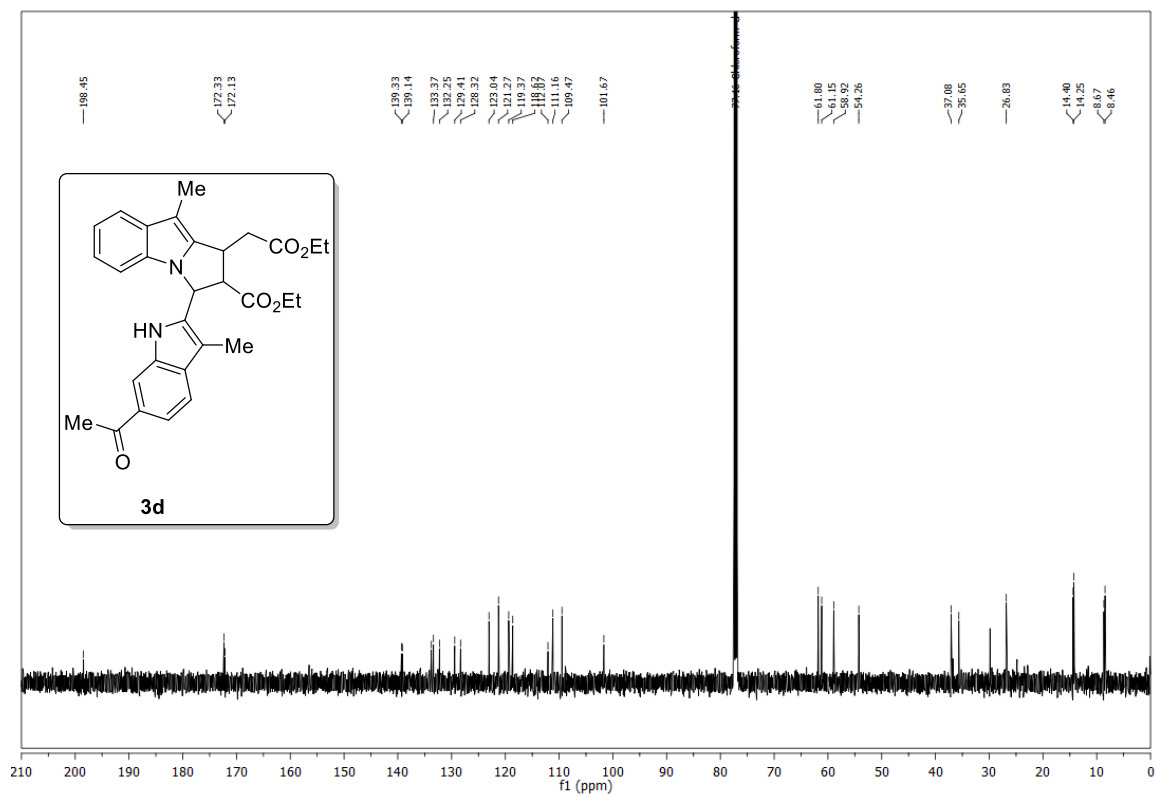

$^1\text{H}$  NMR (500 MHz,  $\text{CDCl}_3$ ) of **3e**

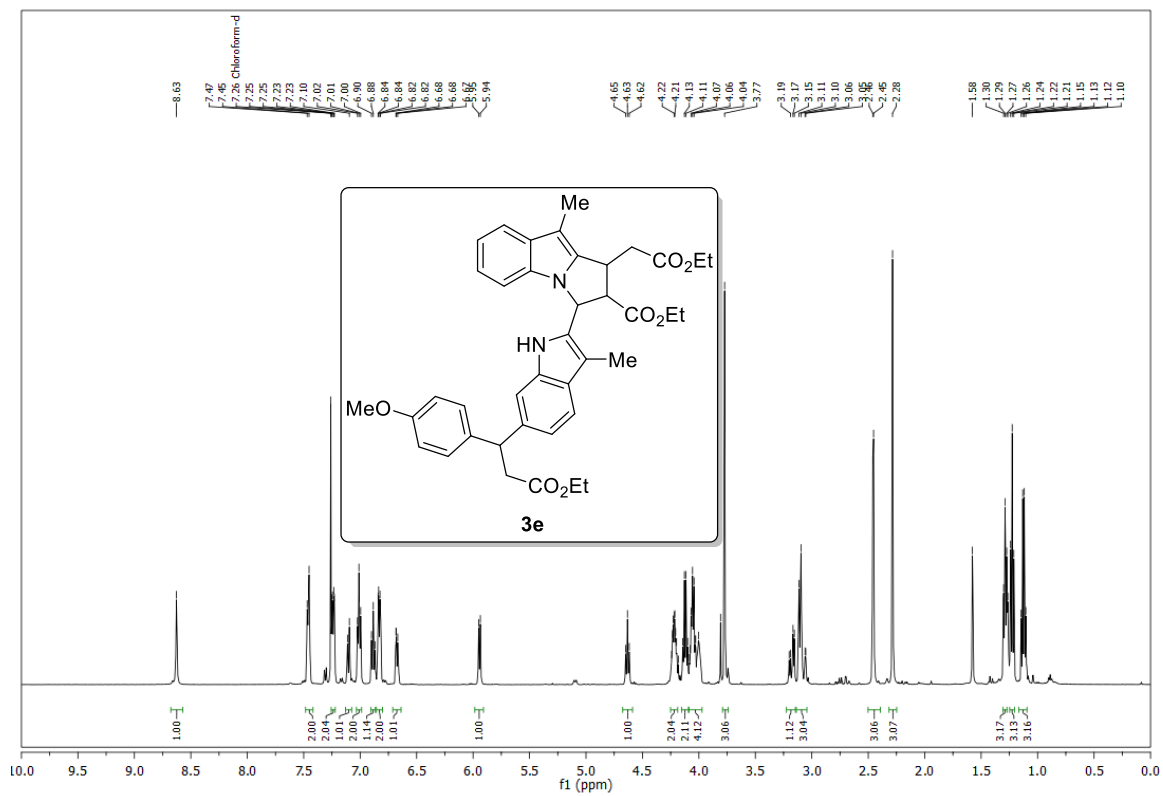

$^{13}\text{C}\{^1\text{H}\}$  NMR(126 MHz,  $\text{CDCl}_3$ ) of **3e**

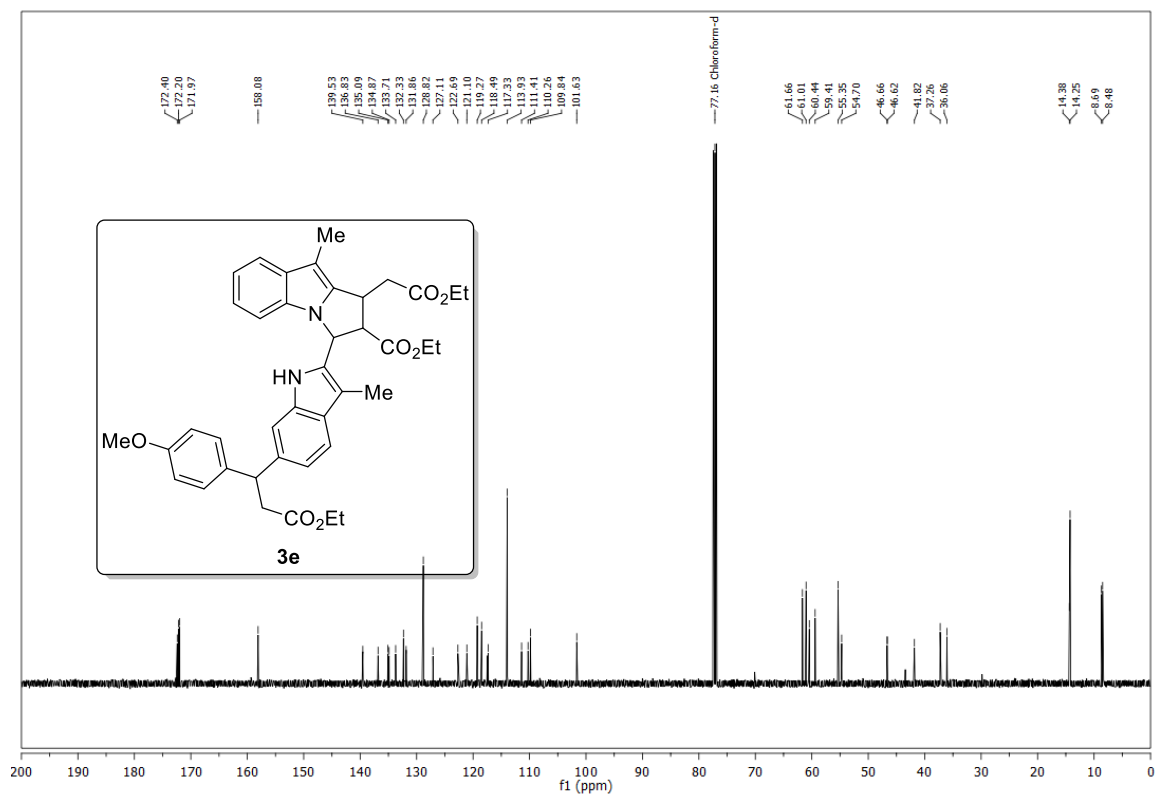

DEPT of **3e**

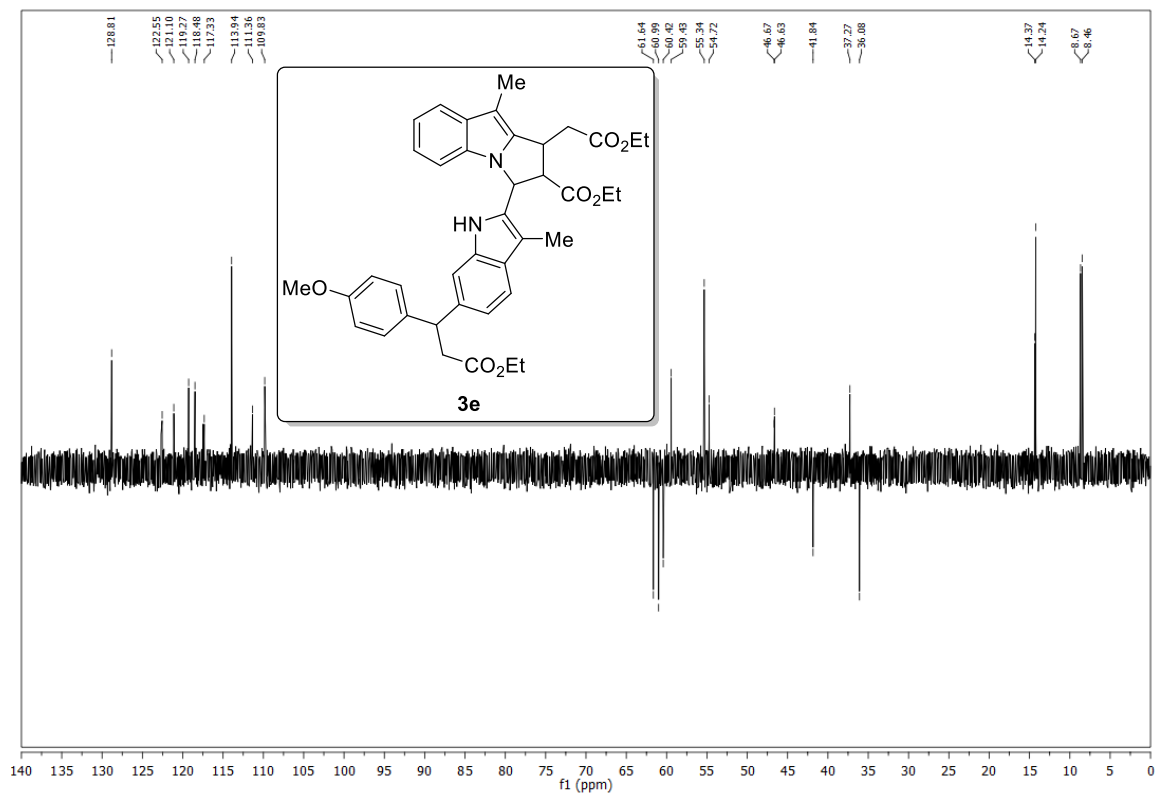

<sup>1</sup>H NMR (500 MHz, CDCl<sub>3</sub>) of 3f

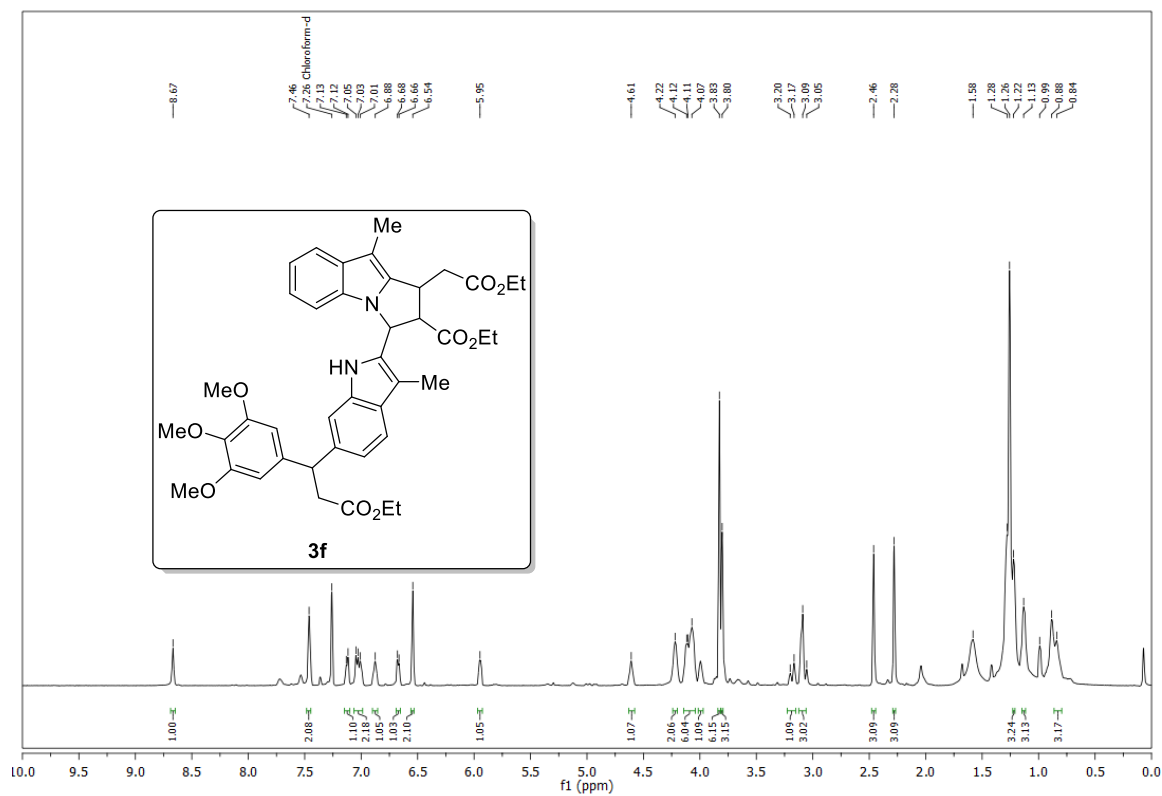

<sup>13</sup>C{<sup>1</sup>H} NMR(126 MHz, CDCl<sub>3</sub>) of 3f

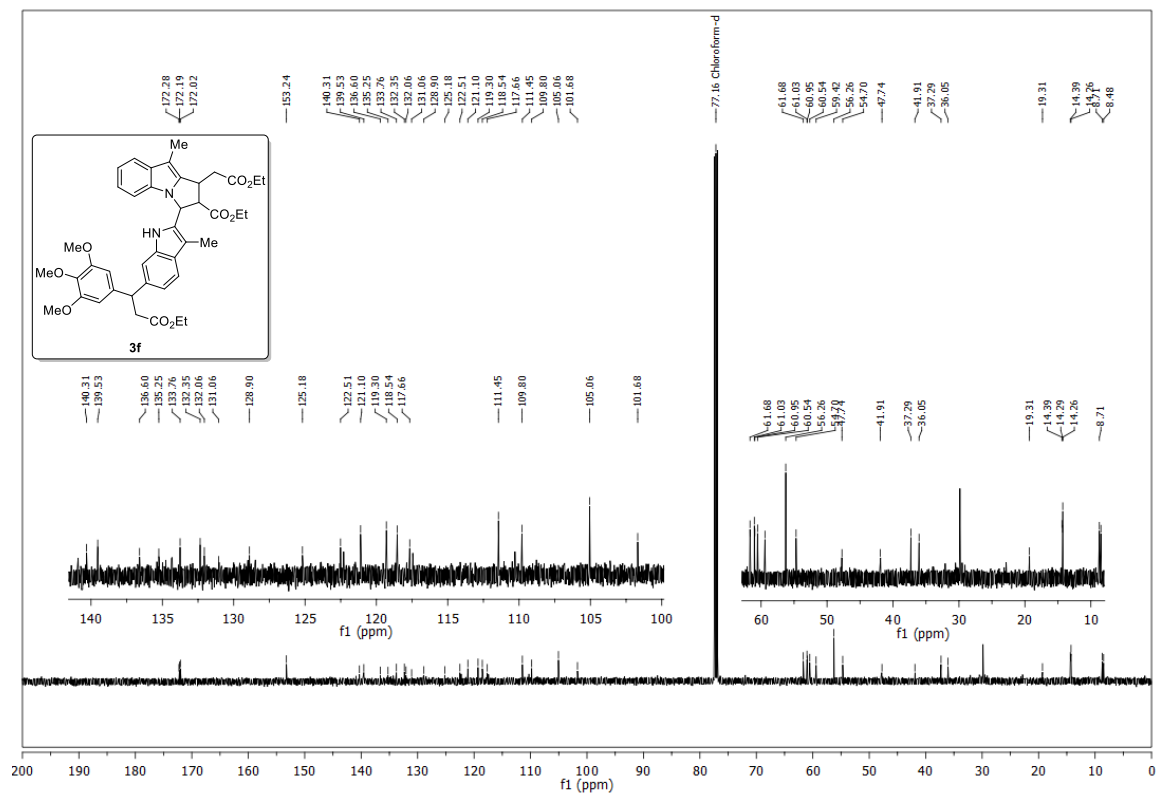

$^1\text{H}$  NMR (500 MHz,  $\text{CDCl}_3$ ) of **3g**

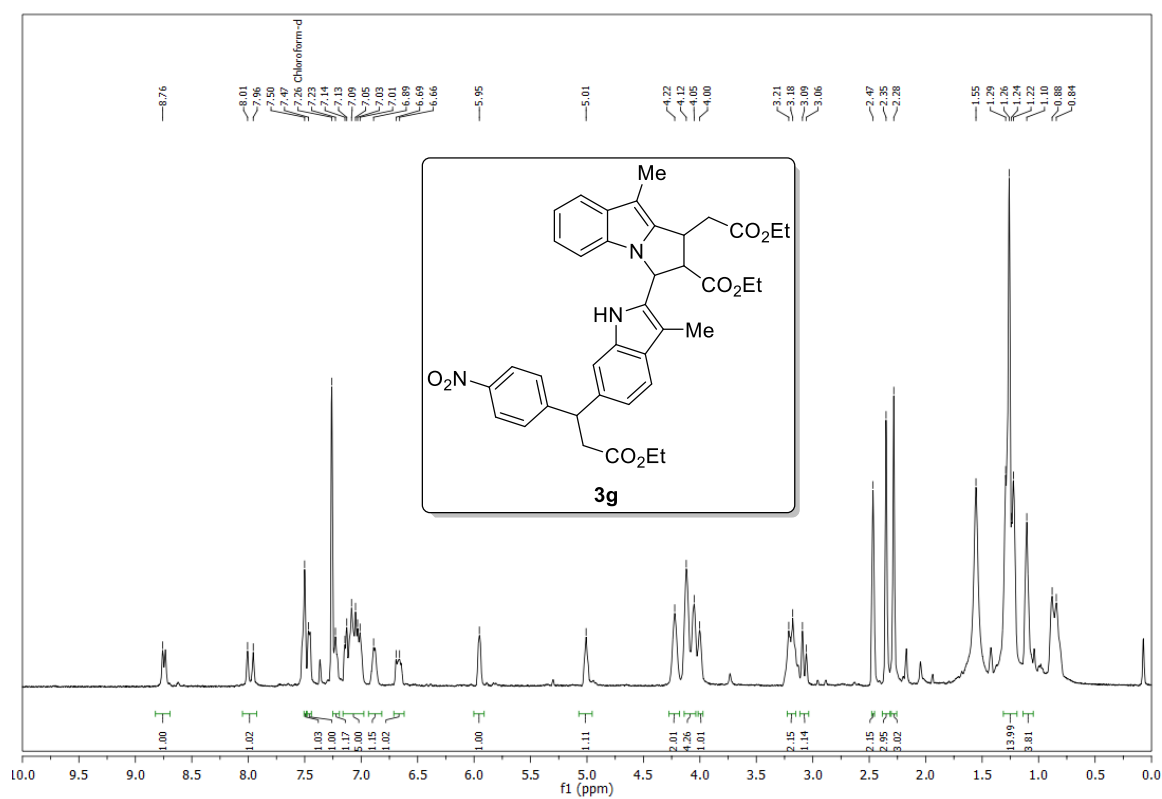

$^{13}\text{C}\{^1\text{H}\}$  NMR (126 MHz,  $\text{CDCl}_3$ ) of **3g**

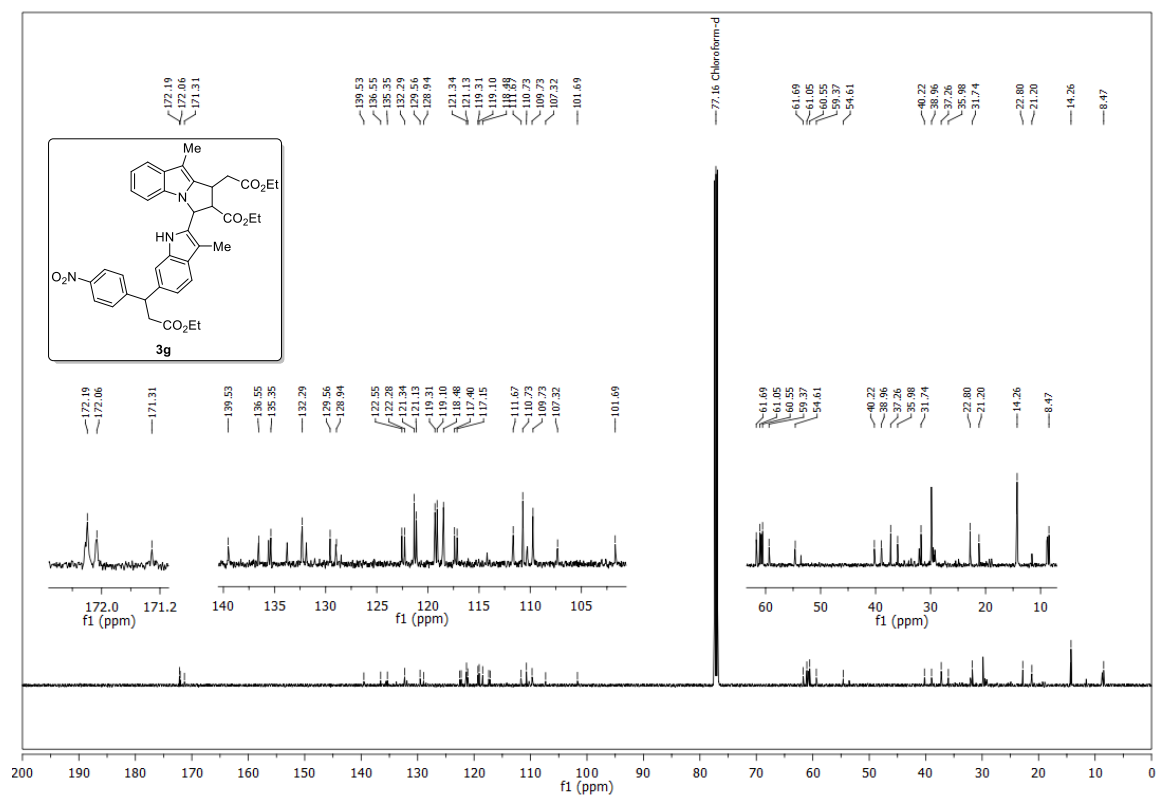



**<sup>1</sup>H NMR (500 MHz, CDCl<sub>3</sub>) of 4a**

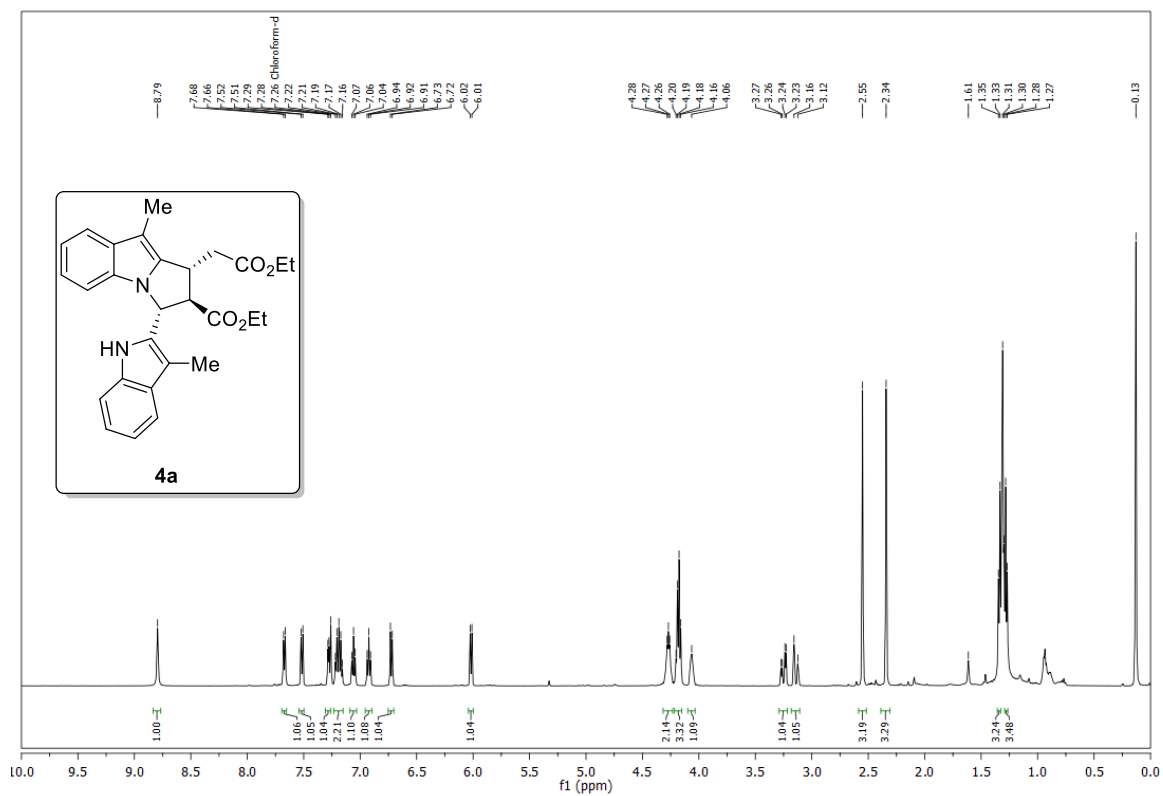

**<sup>13</sup>C{<sup>1</sup>H} NMR (126 MHz, CDCl<sub>3</sub>) of 4a**

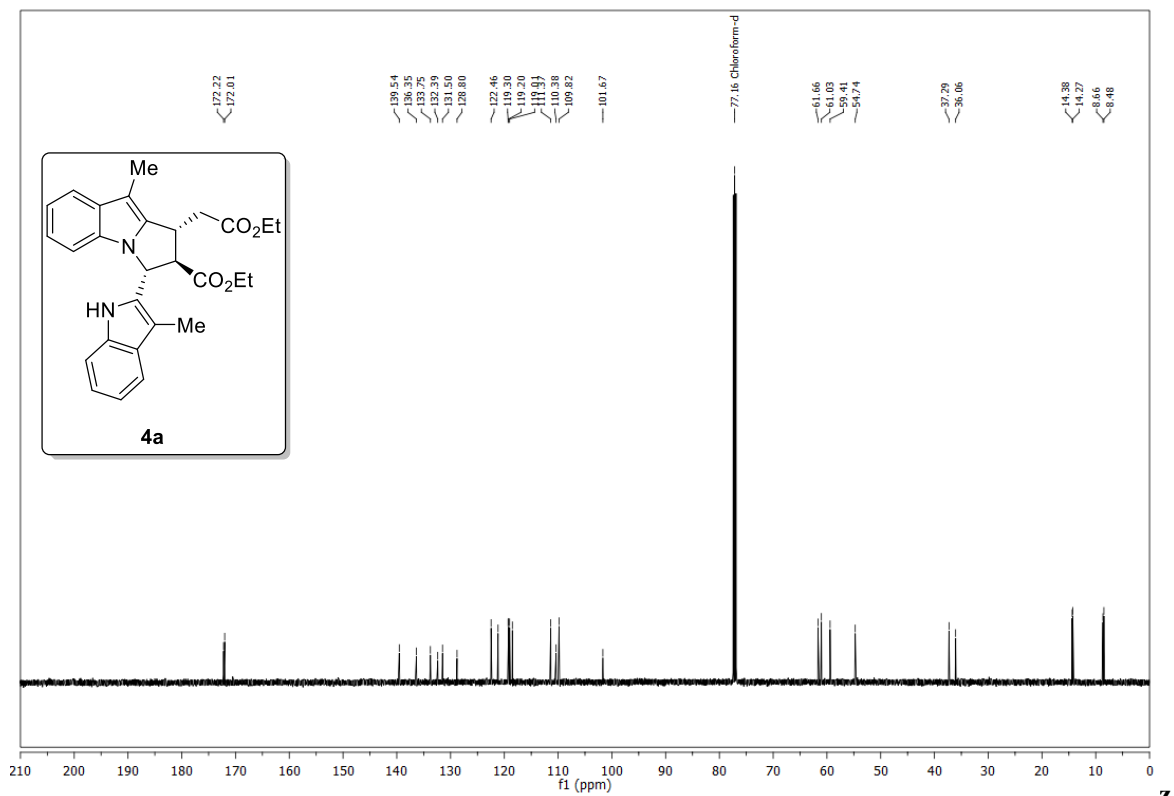

DEPT of 4a

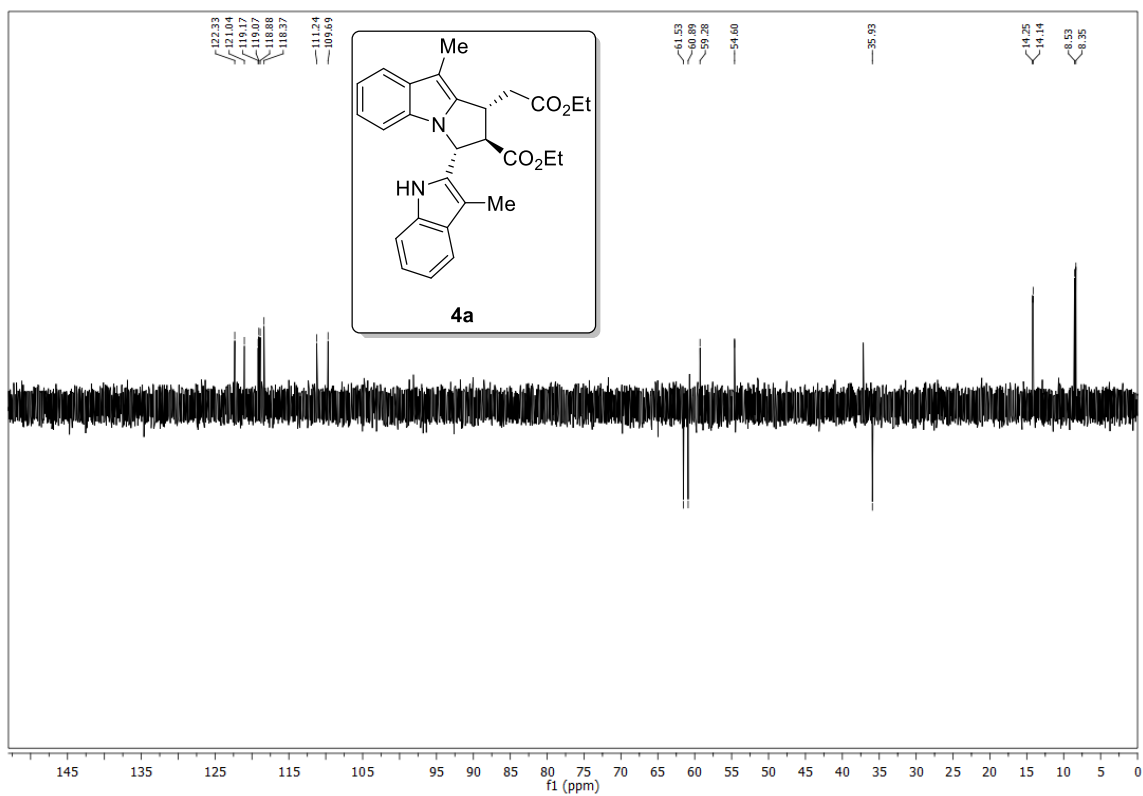

<sup>1</sup>H NMR (500 MHz, CDCl<sub>3</sub>) of 4b

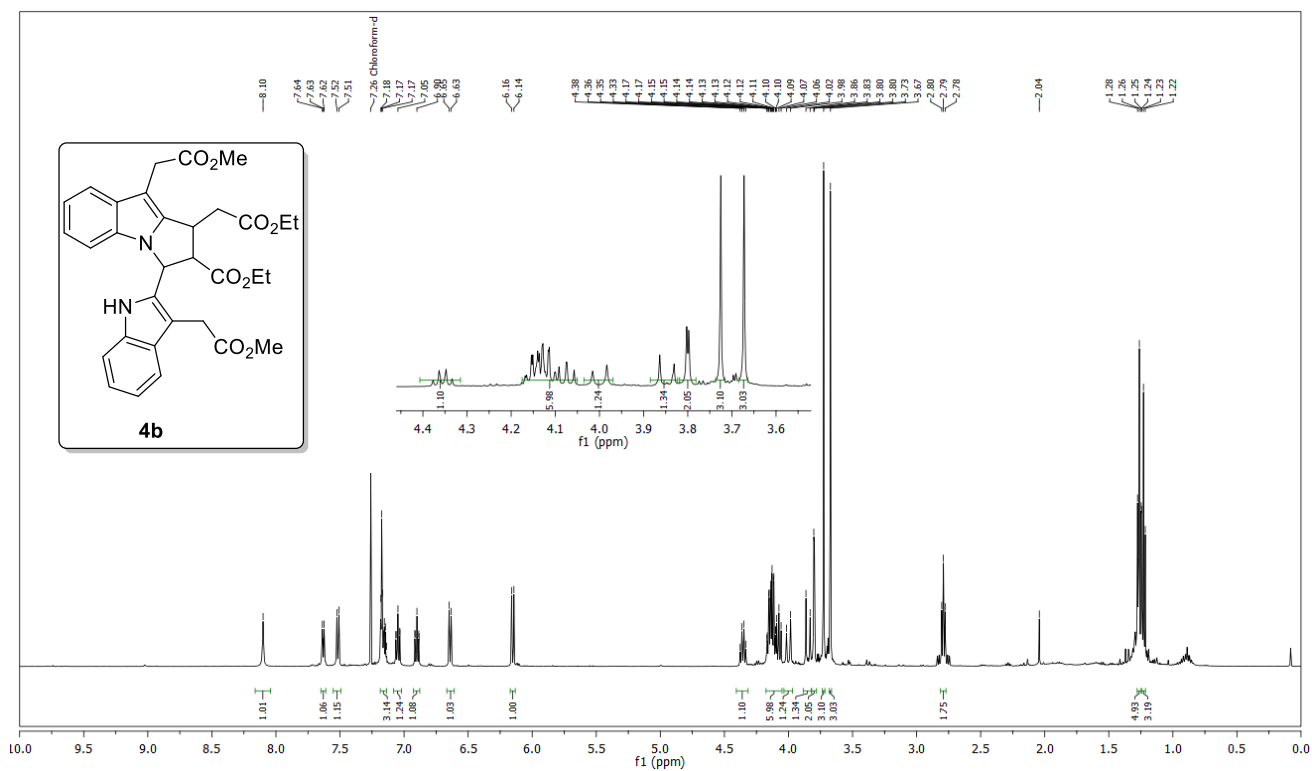

$^{13}\text{C}\{^1\text{H}\}$  NMR (126 MHz,  $\text{CDCl}_3$ ) of **4b**

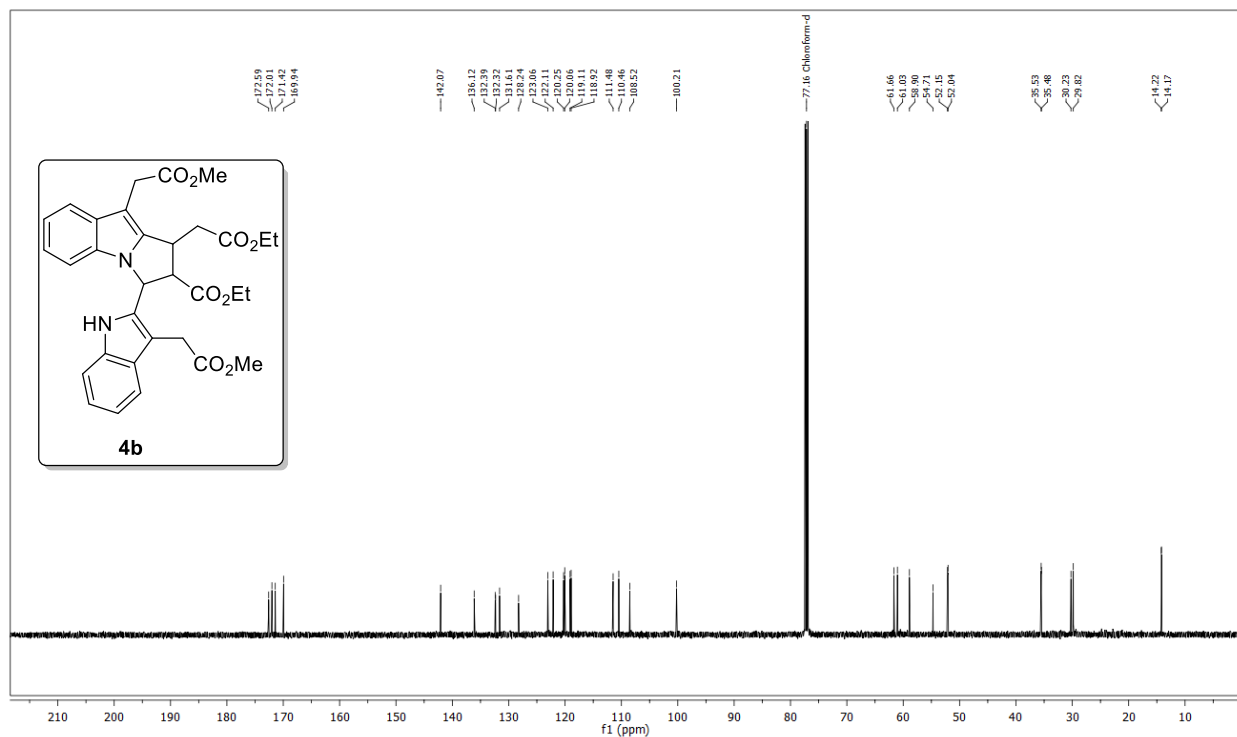

$^1\text{H}$  NMR (500 MHz,  $\text{CDCl}_3$ ) of **4c**

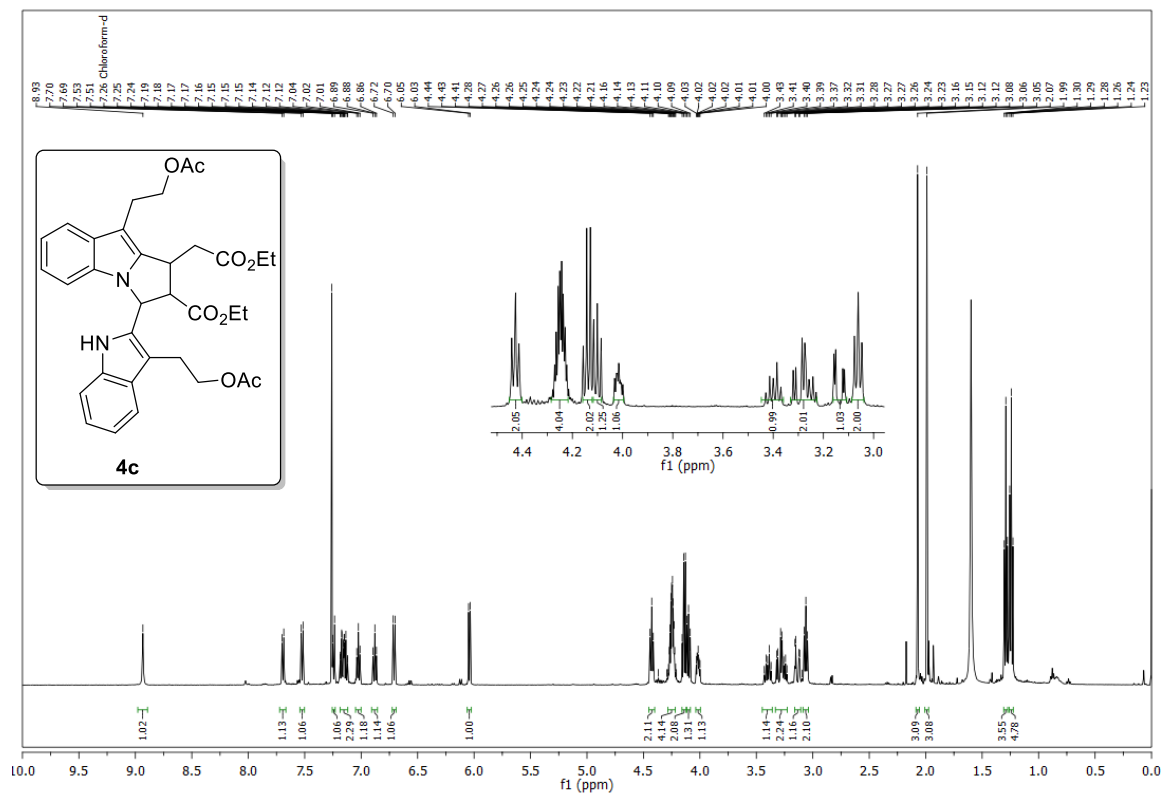

$^{13}\text{C}\{^1\text{H}\}$  NMR(126 MHz,  $\text{CDCl}_3$ ) of **4c**

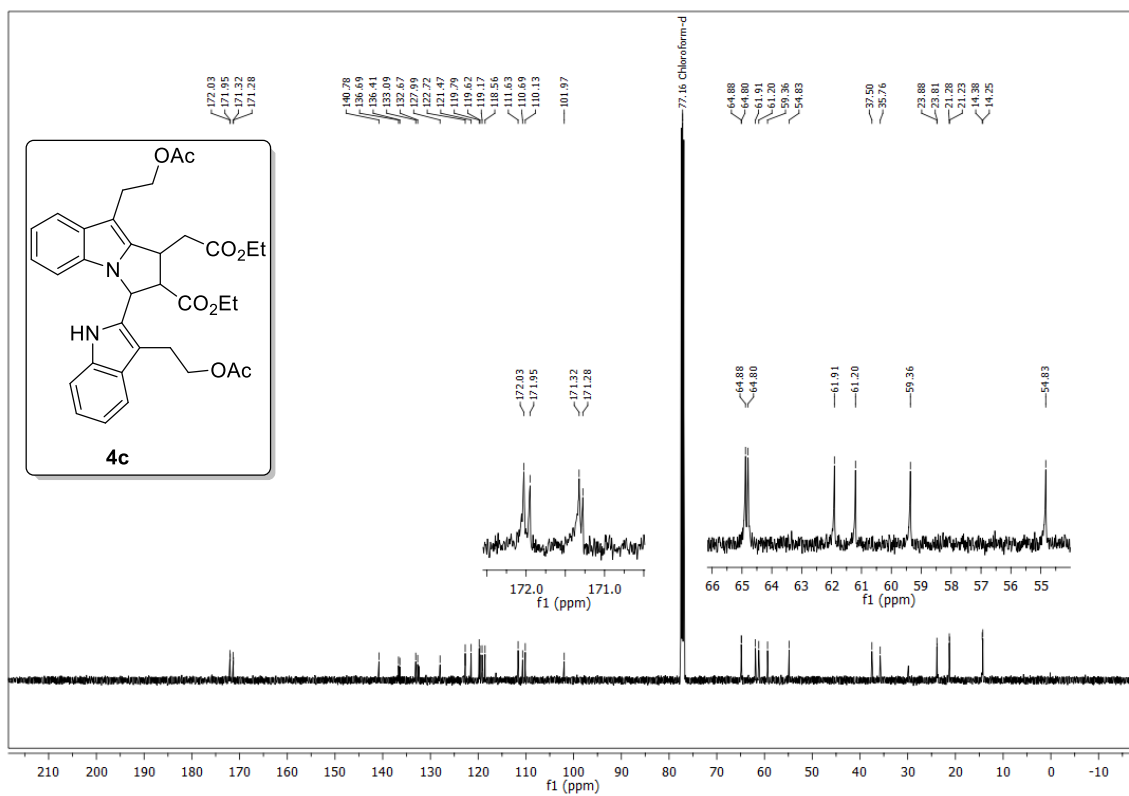

$^1\text{H}$  NMR (500 MHz,  $\text{CDCl}_3$ ) of **4d**

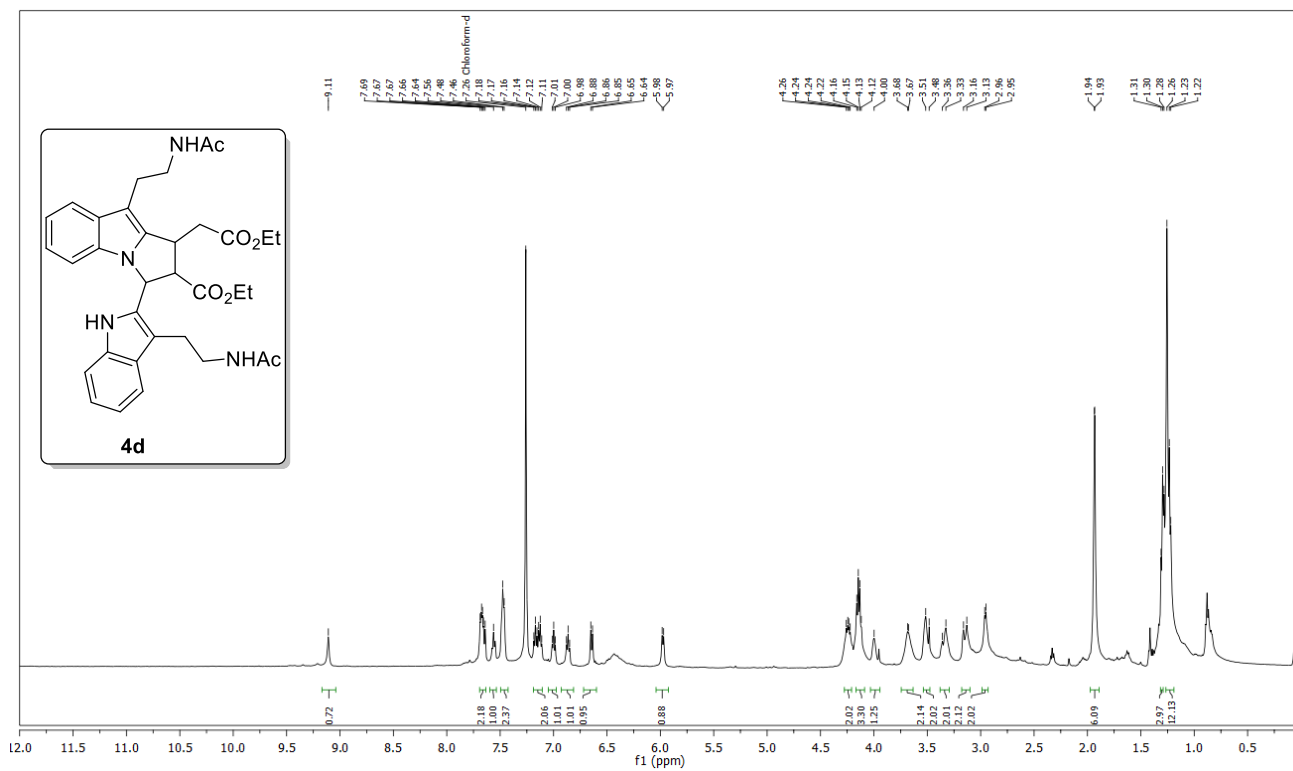

$^{13}\text{C}\{^1\text{H}\}$  NMR (126 MHz,  $\text{CDCl}_3$ ) of **4d**

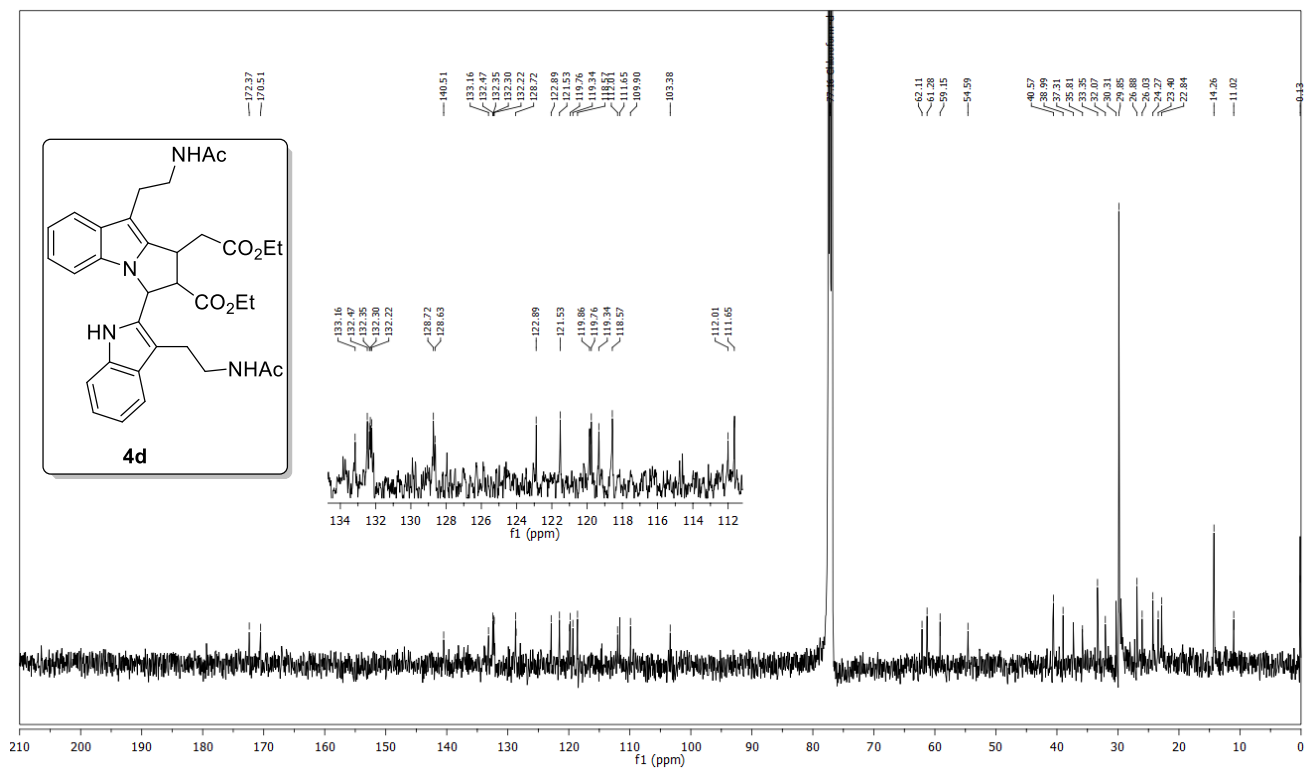

$^1\text{H}$  NMR (500 MHz,  $\text{CDCl}_3$ ) of **4e**

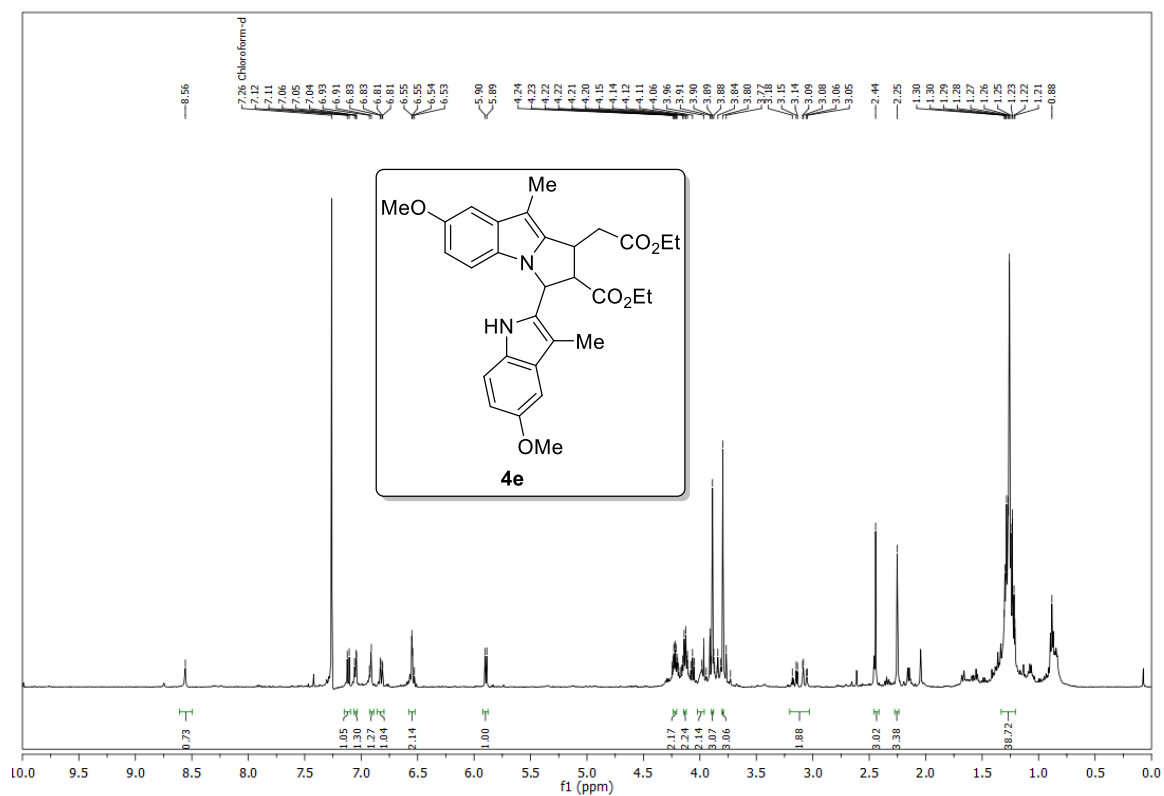

$^{13}\text{C}\{^1\text{H}\}$  NMR(126 MHz,  $\text{CDCl}_3$ ) of **4e**

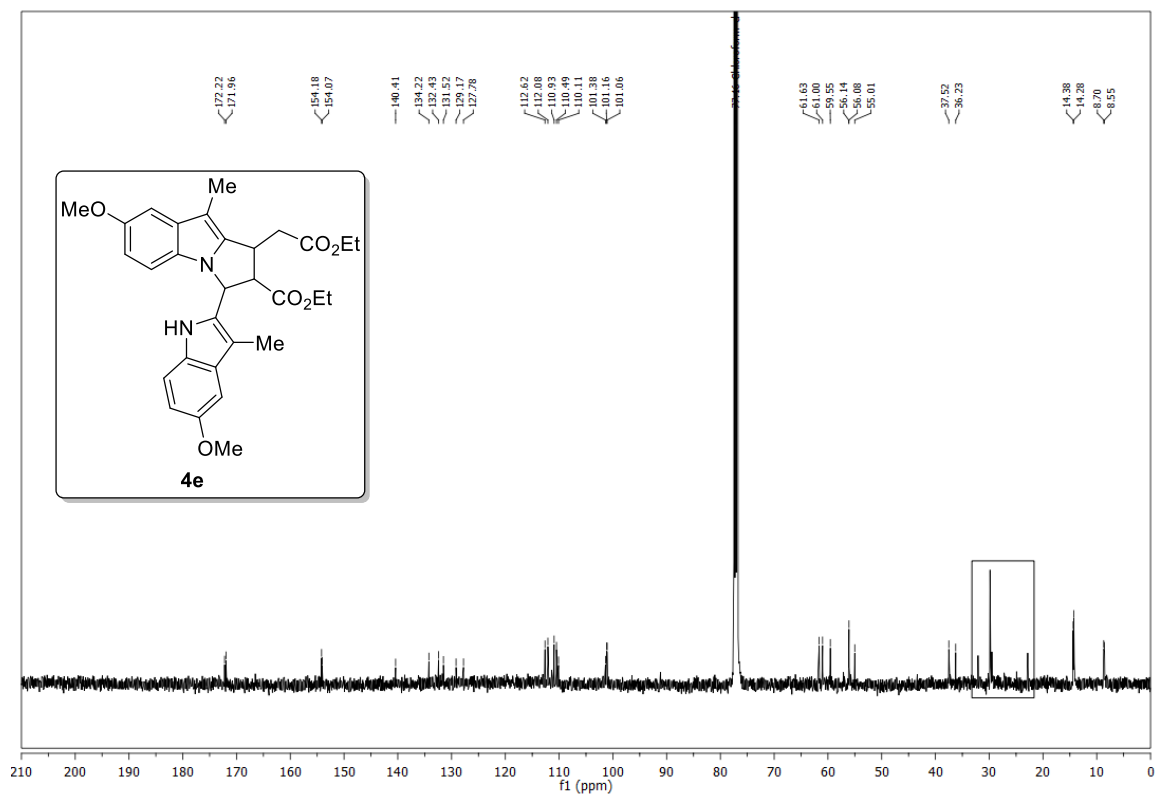

$^1\text{H}$  NMR (500 MHz,  $\text{CDCl}_3$ ) of **4f**

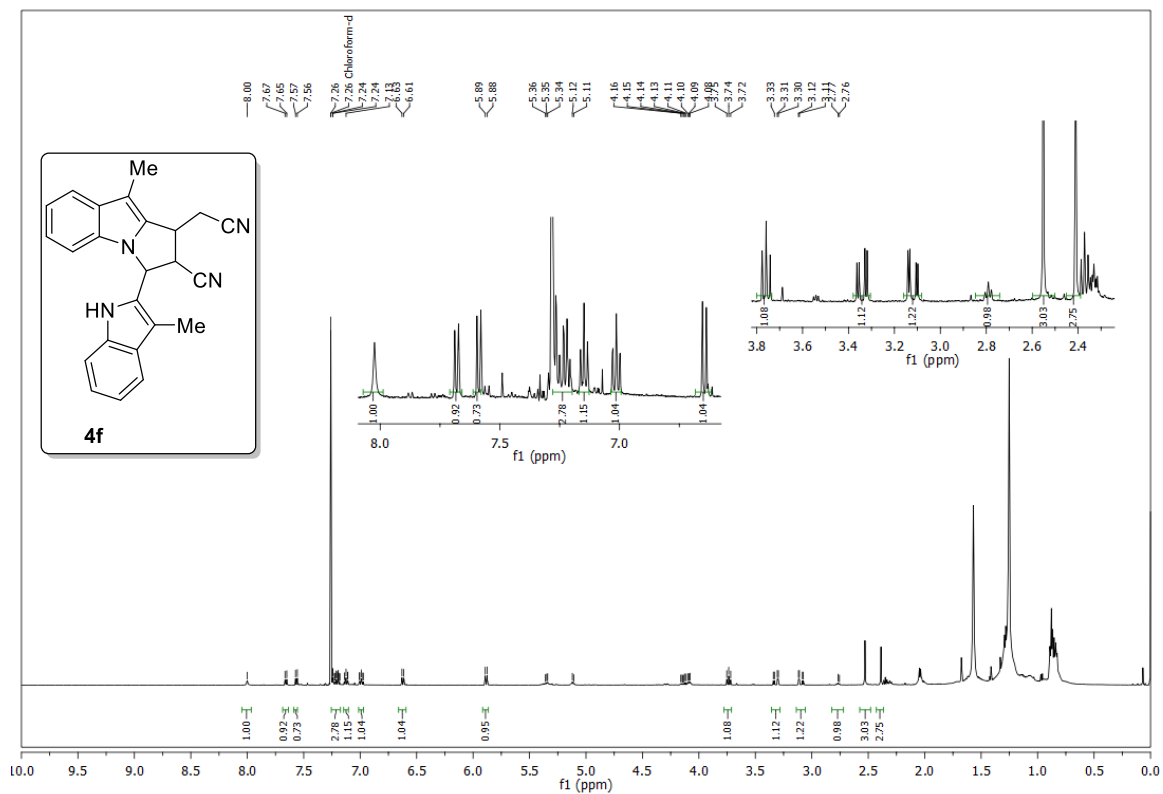

$^{13}\text{C}\{^1\text{H}\}$  NMR(126 MHz,  $\text{CDCl}_3$ ) of **4f**

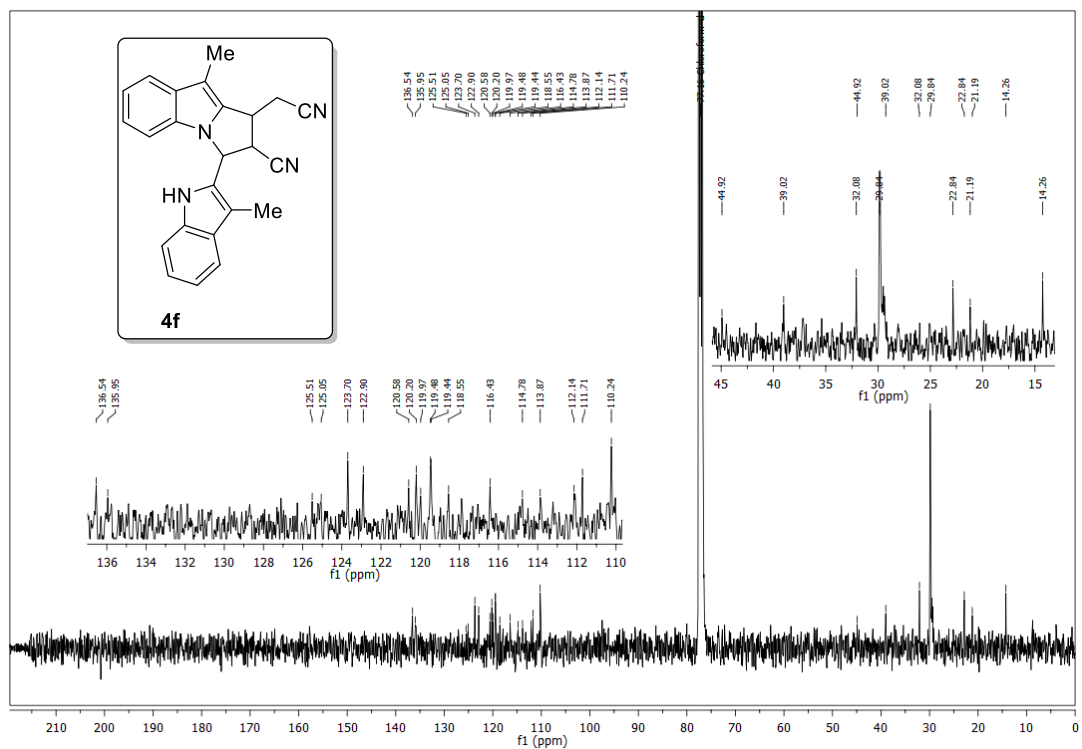

$^1\text{H}$  NMR (500 MHz,  $\text{CDCl}_3$ ) of **4g**

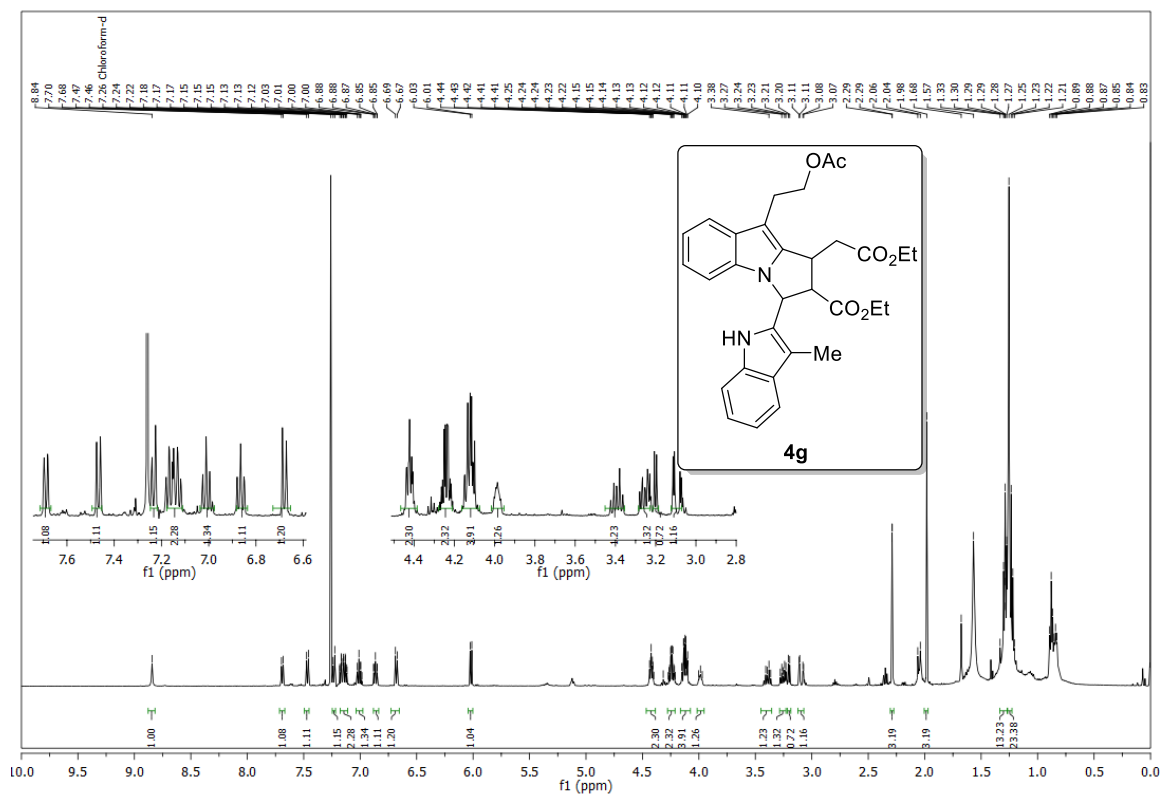

$^{13}\text{C}\{^1\text{H}\}$  NMR(126 MHz,  $\text{CDCl}_3$ ) of 4g

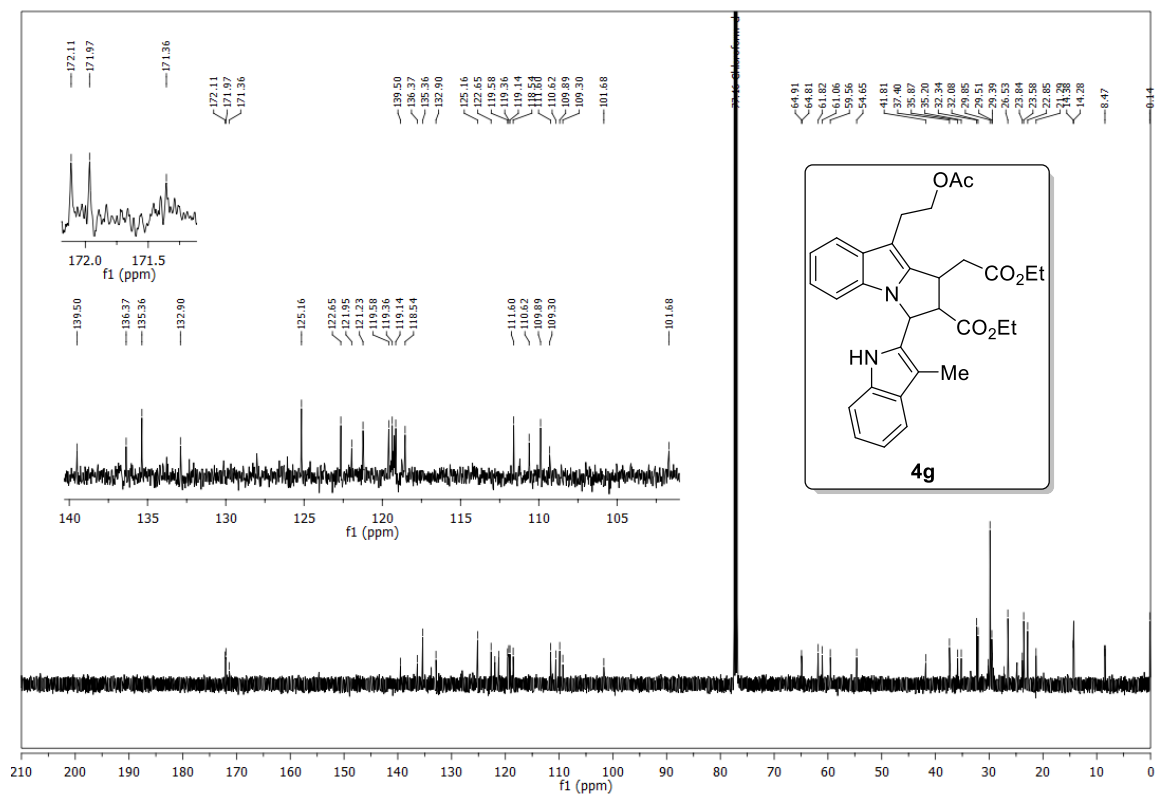

$^1\text{H}$  NMR (500 MHz,  $\text{CDCl}_3$ ) of 5a

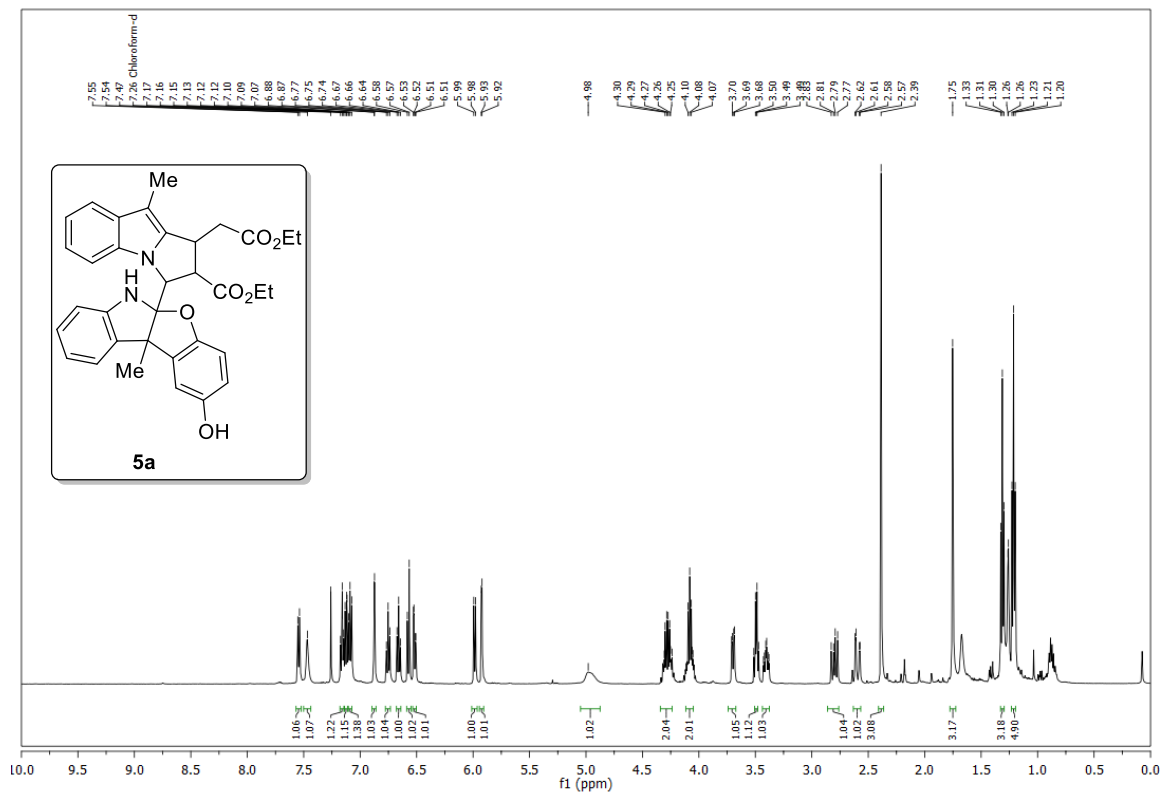



$^{13}\text{C}\{^1\text{H}\}$  NMR(126 MHz,  $\text{CDCl}_3$ ) of **5a**

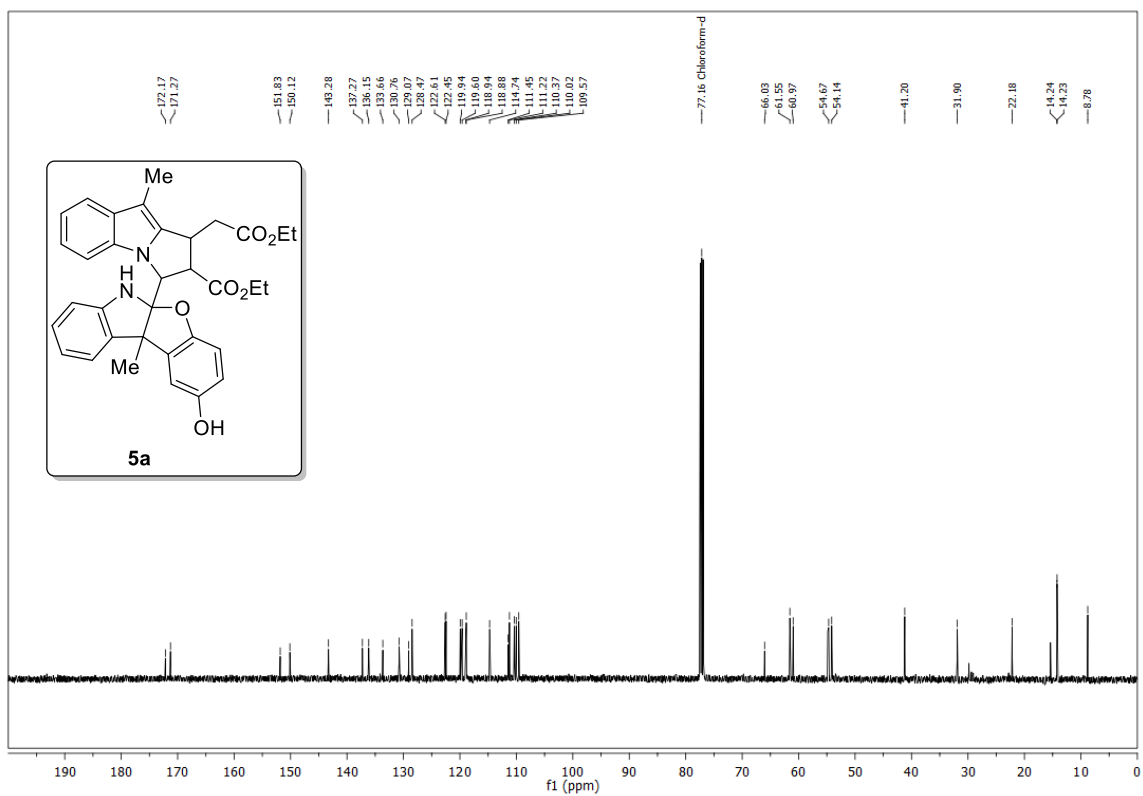

DEPT of **5a**

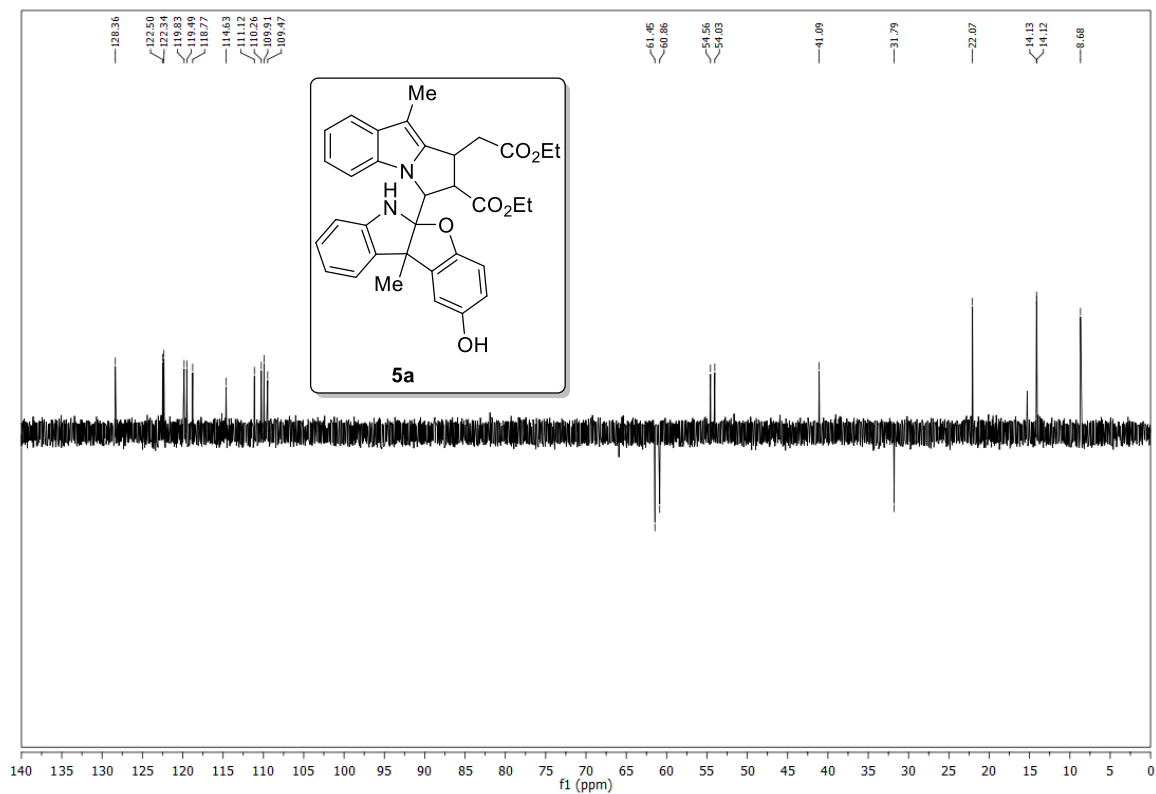

**<sup>1</sup>H NMR (500 MHz, CDCl<sub>3</sub>) of 5b**

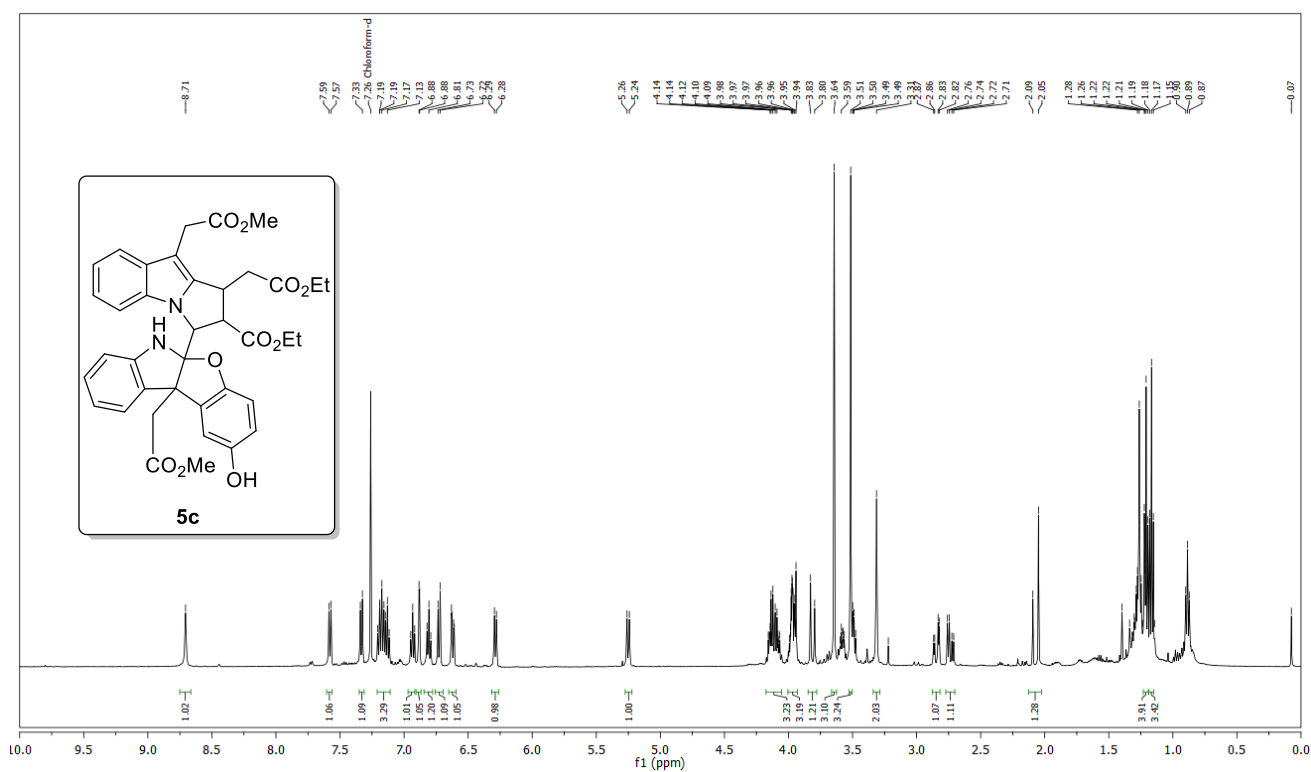

**<sup>13</sup>C{<sup>1</sup>H} NMR(126 MHz, CDCl<sub>3</sub>) of 5b**

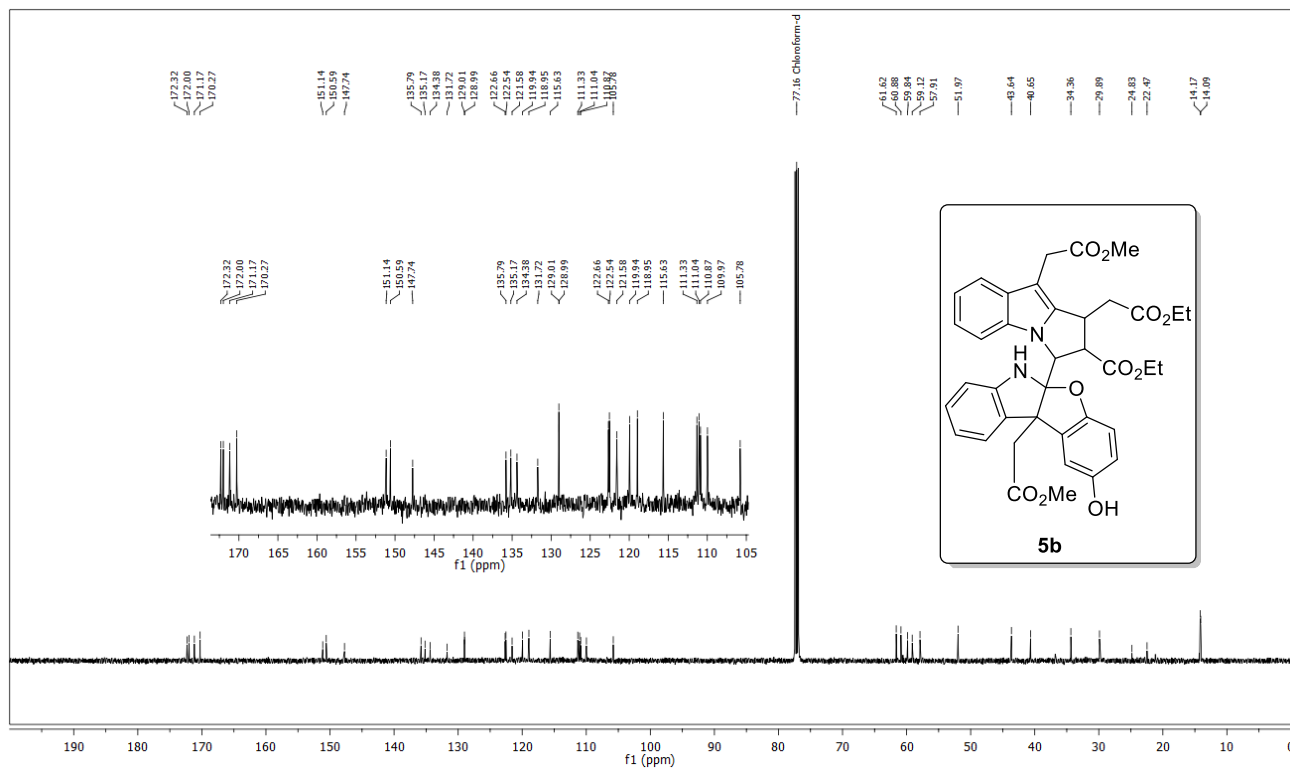

**$^1\text{H}$  NMR (500 MHz,  $\text{CDCl}_3$ ) of **5c****

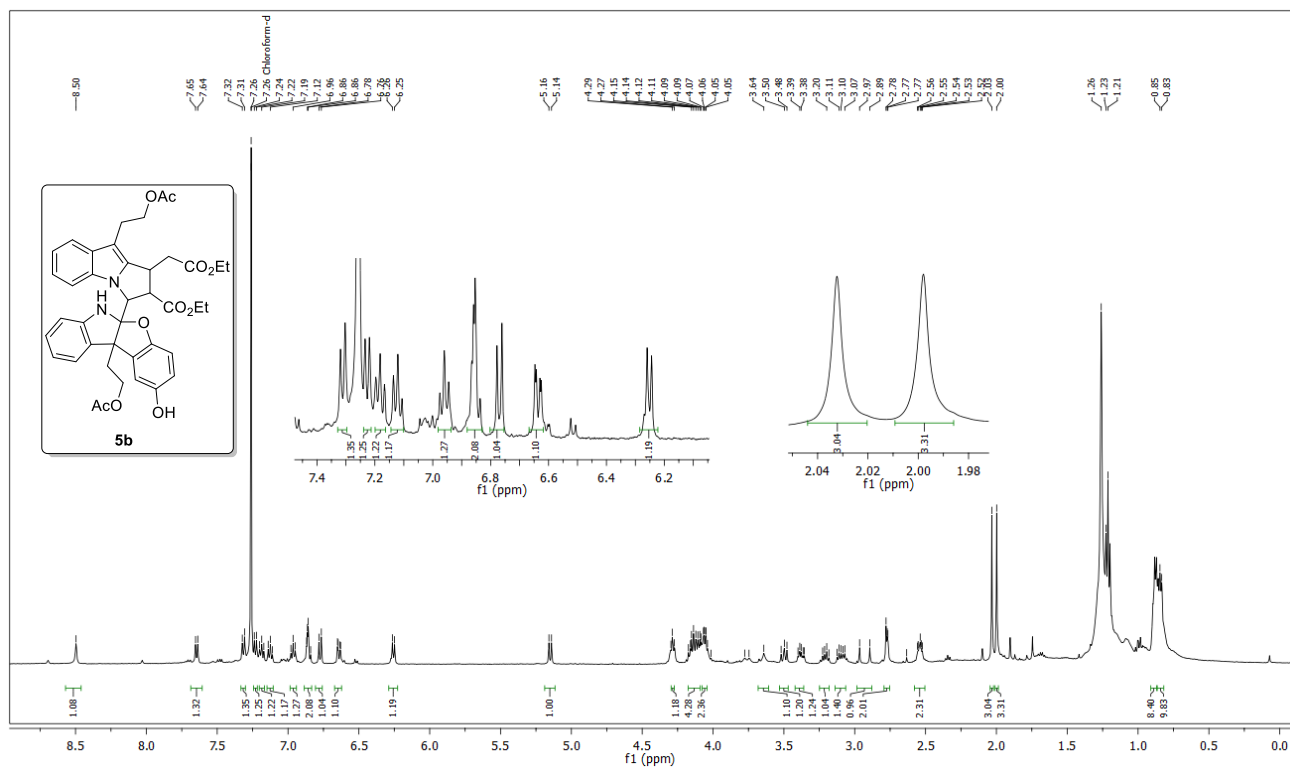

<sup>1</sup>H NMR (500 MHz, CDCl<sub>3</sub>) of 5d

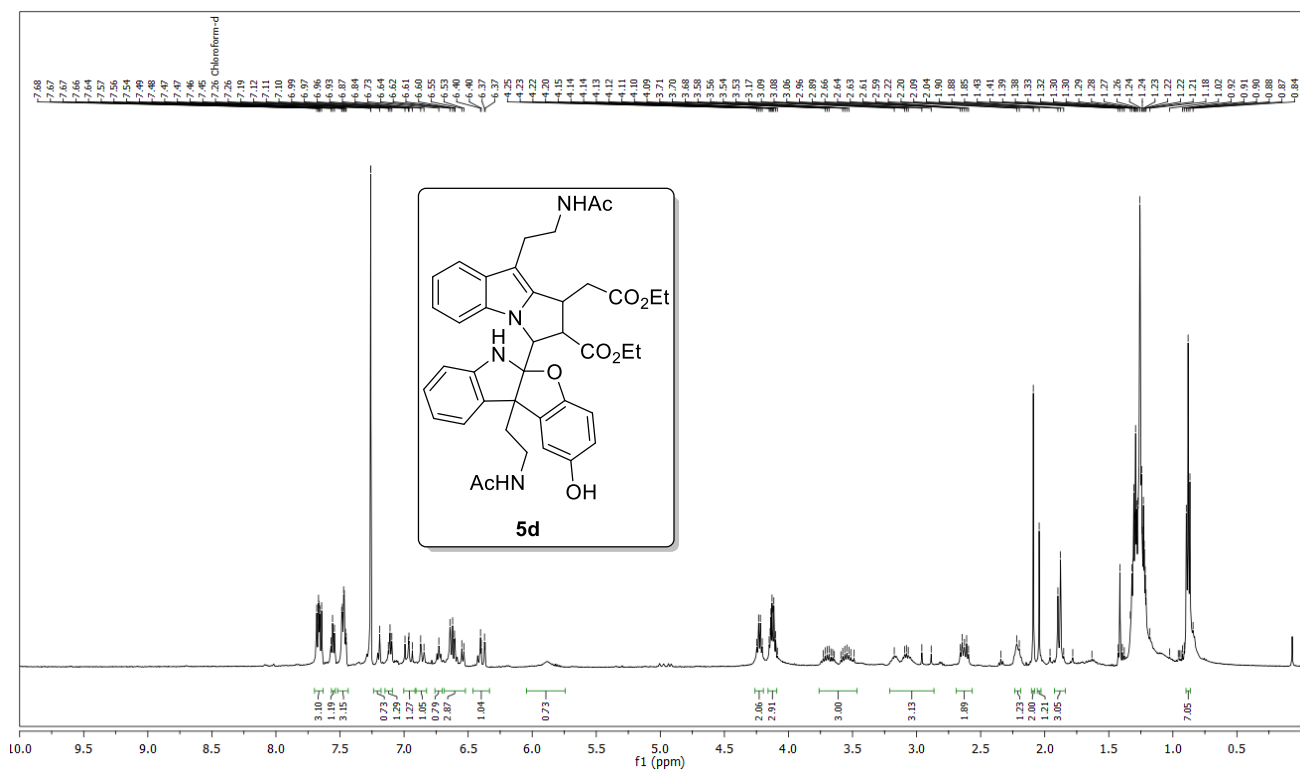

<sup>13</sup>C{<sup>1</sup>H} NMR(126 MHz, CDCl<sub>3</sub>) of 5d

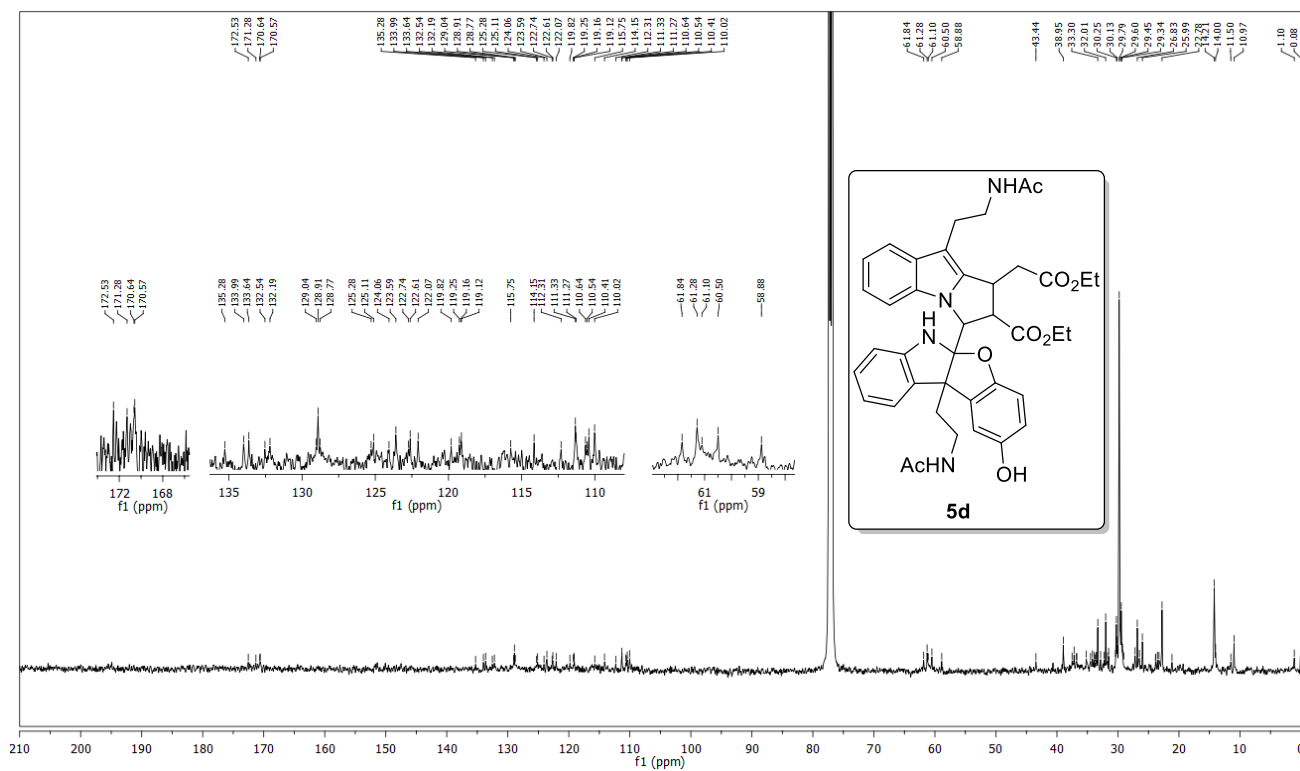

**<sup>1</sup>H NMR (500 MHz, CDCl<sub>3</sub>) of 6**

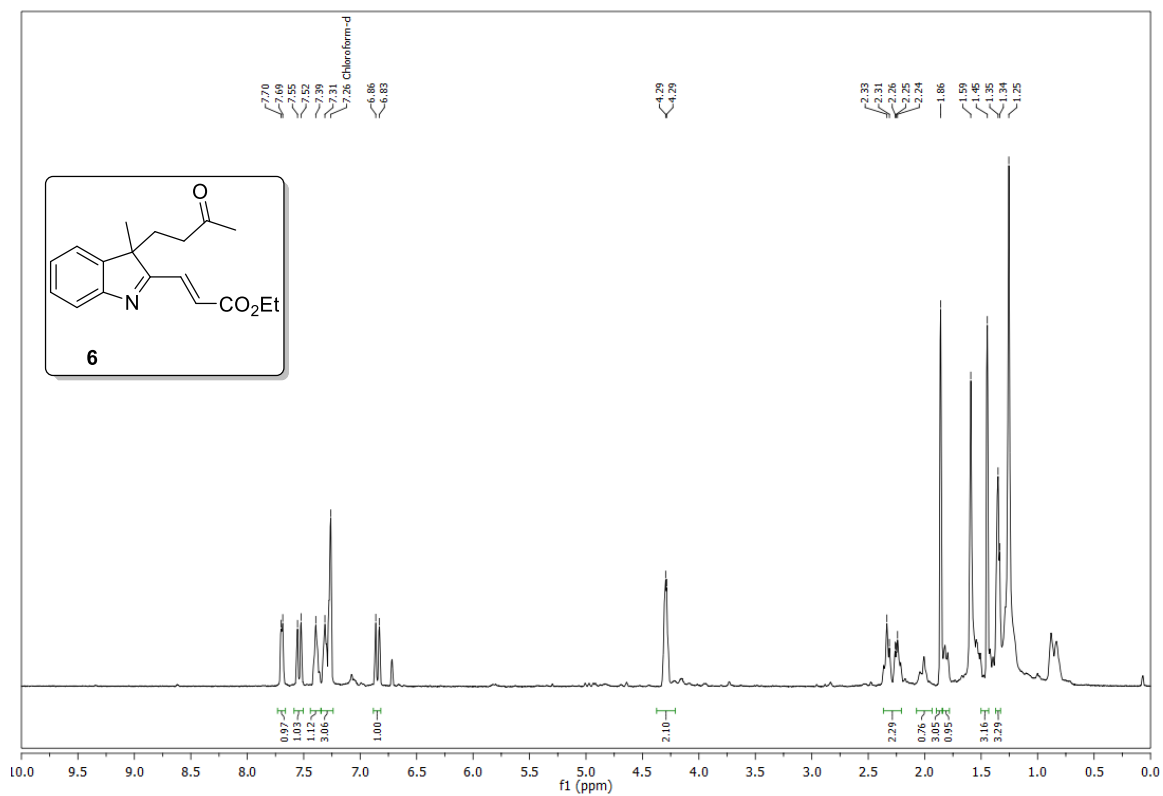

**<sup>13</sup>C{<sup>1</sup>H} NMR(126 MHz, CDCl<sub>3</sub>) of 6**

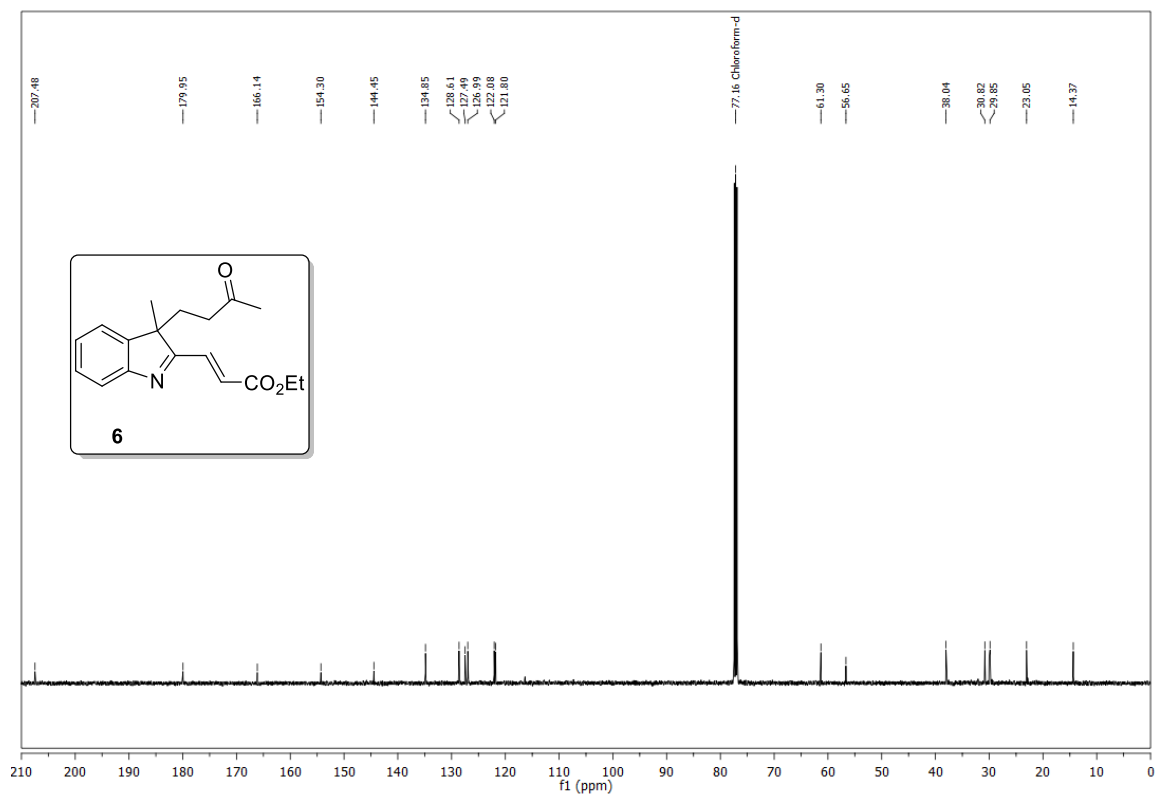

DRPT of 6

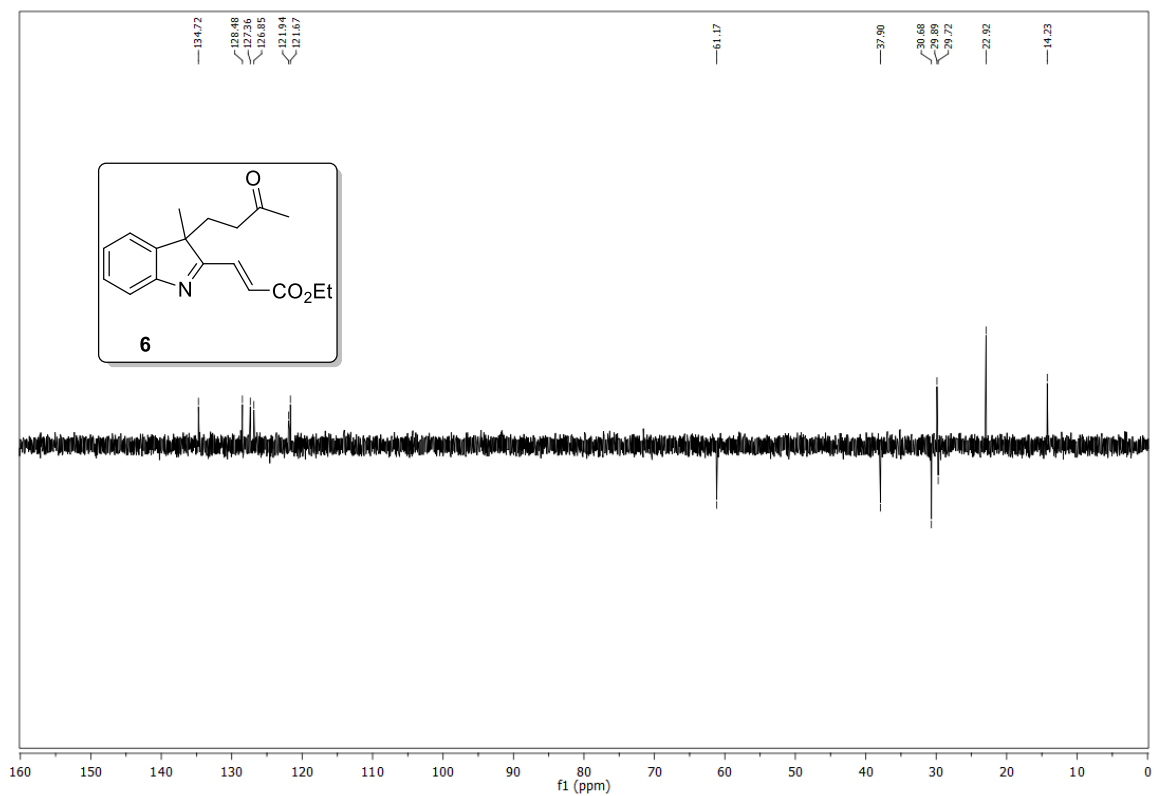

<sup>1</sup>H NMR (500 MHz, CDCl<sub>3</sub>) of 7

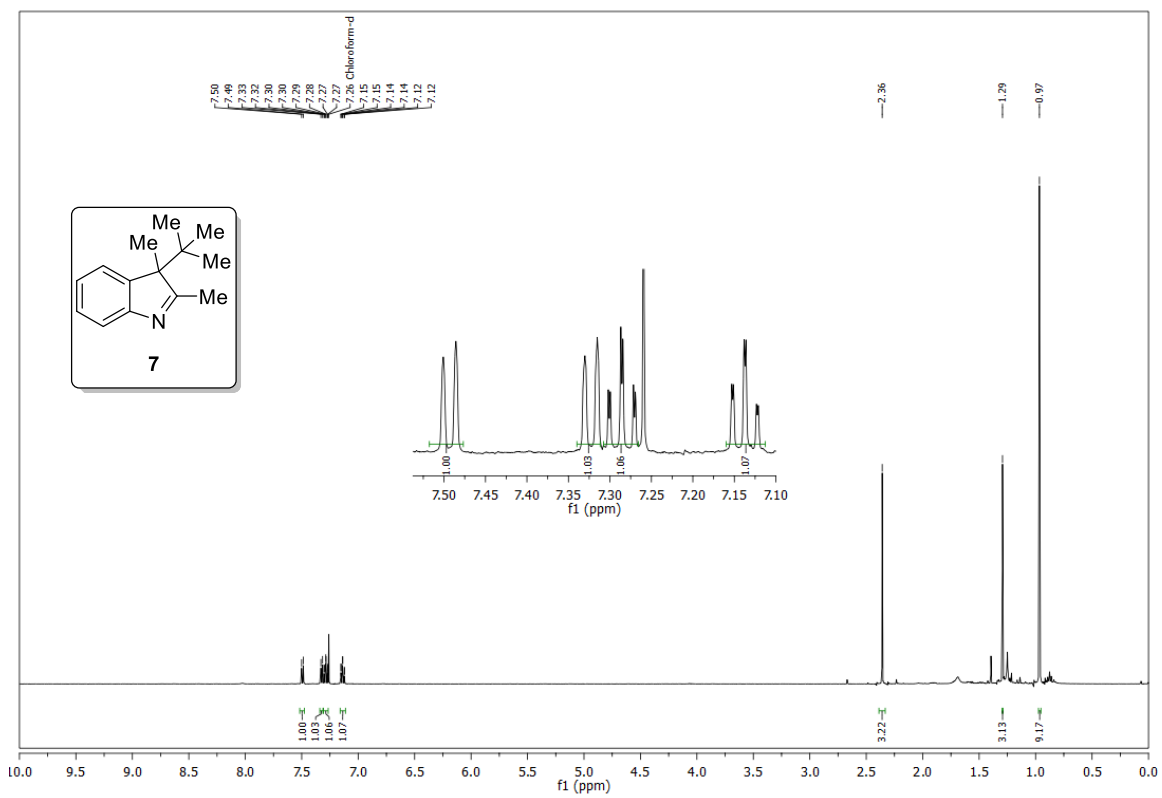

$^{13}\text{C}\{^1\text{H}\}$  NMR(126 MHz,  $\text{CDCl}_3$ ) of 7

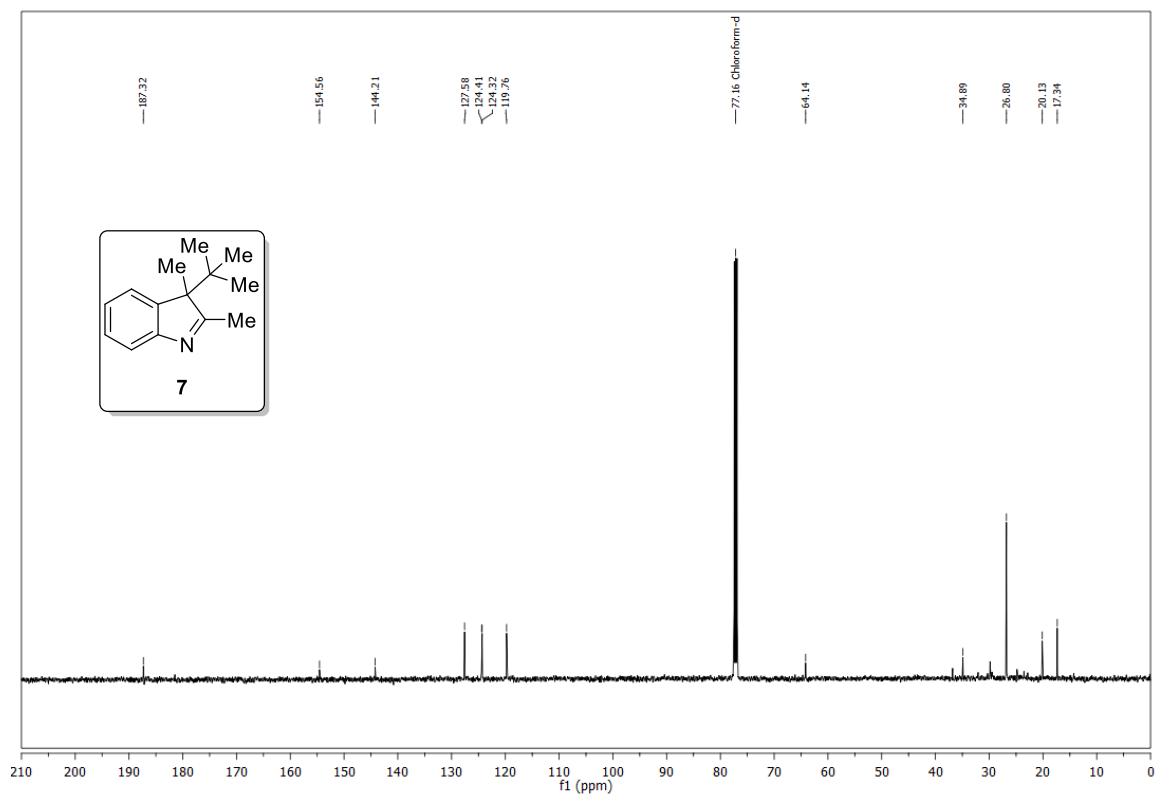

$^1\text{H}$  NMR (500 MHz,  $\text{CDCl}_3$ ) of 8

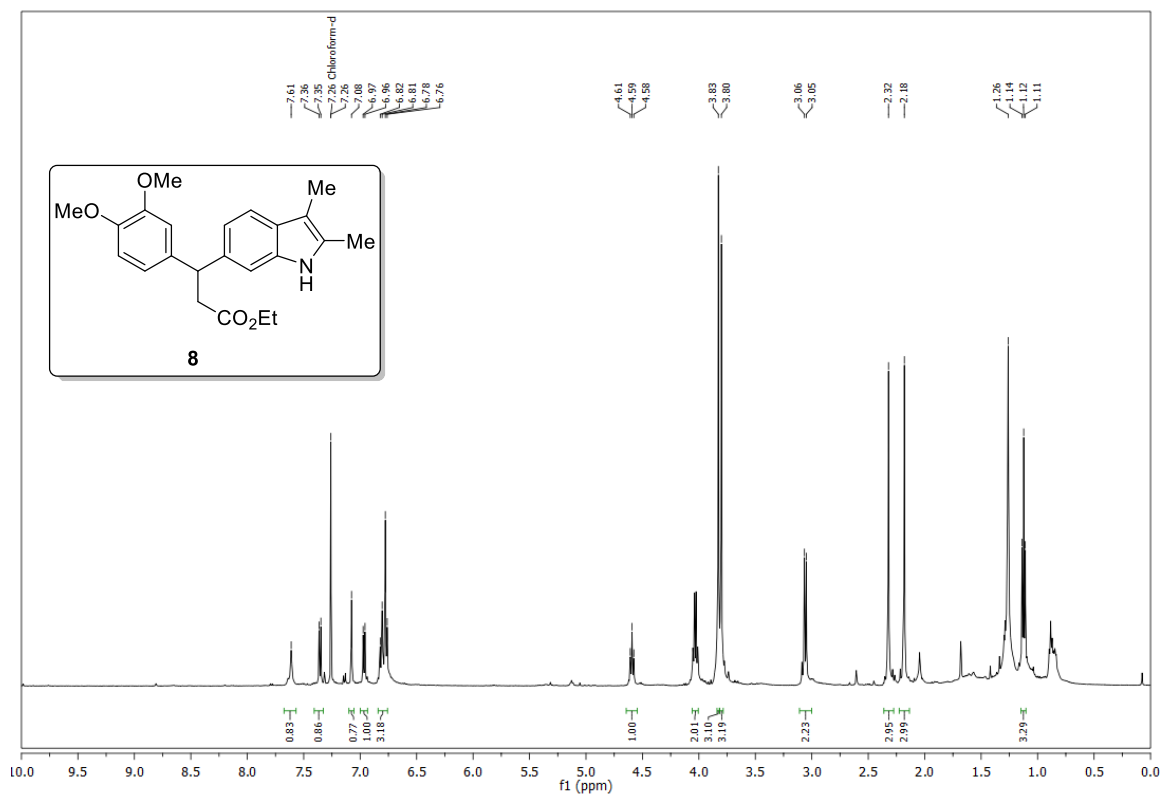

$^{13}\text{C}\{^1\text{H}\}$  NMR(126 MHz,  $\text{CDCl}_3$ ) of **8**

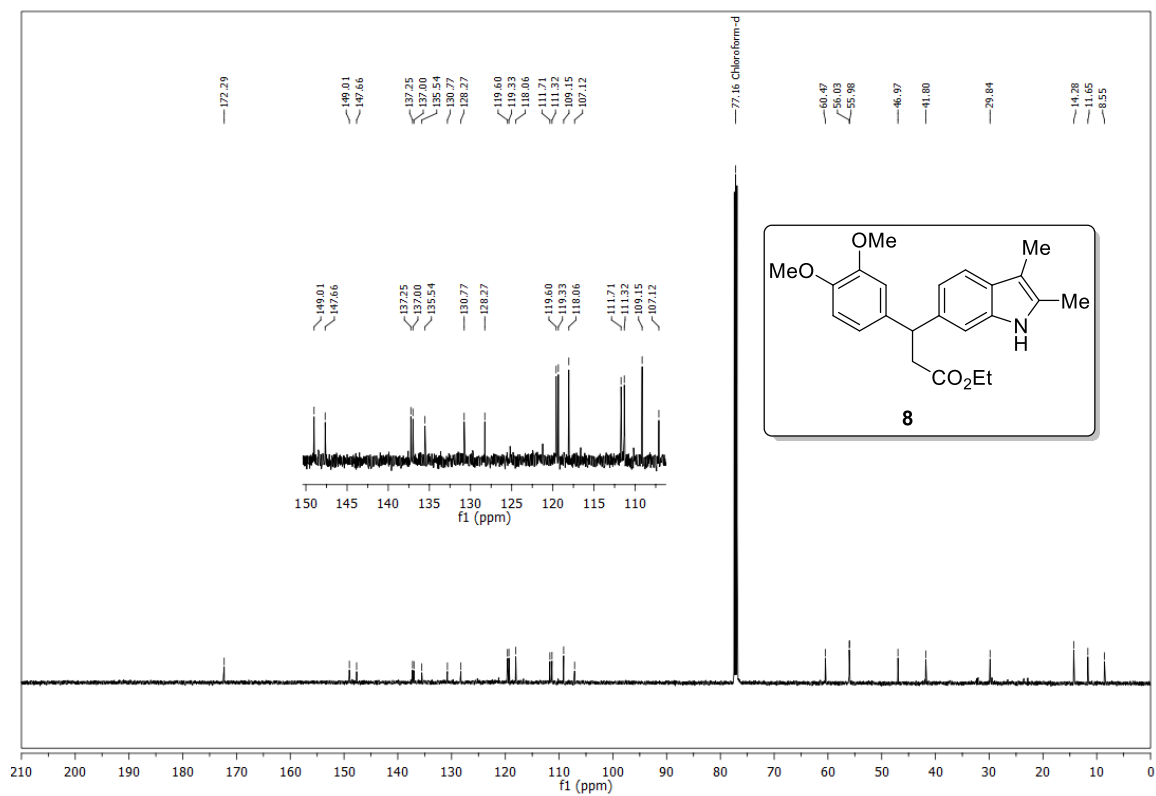

$^1\text{H}$  NMR (500 MHz,  $\text{CDCl}_3$ ) of **9**

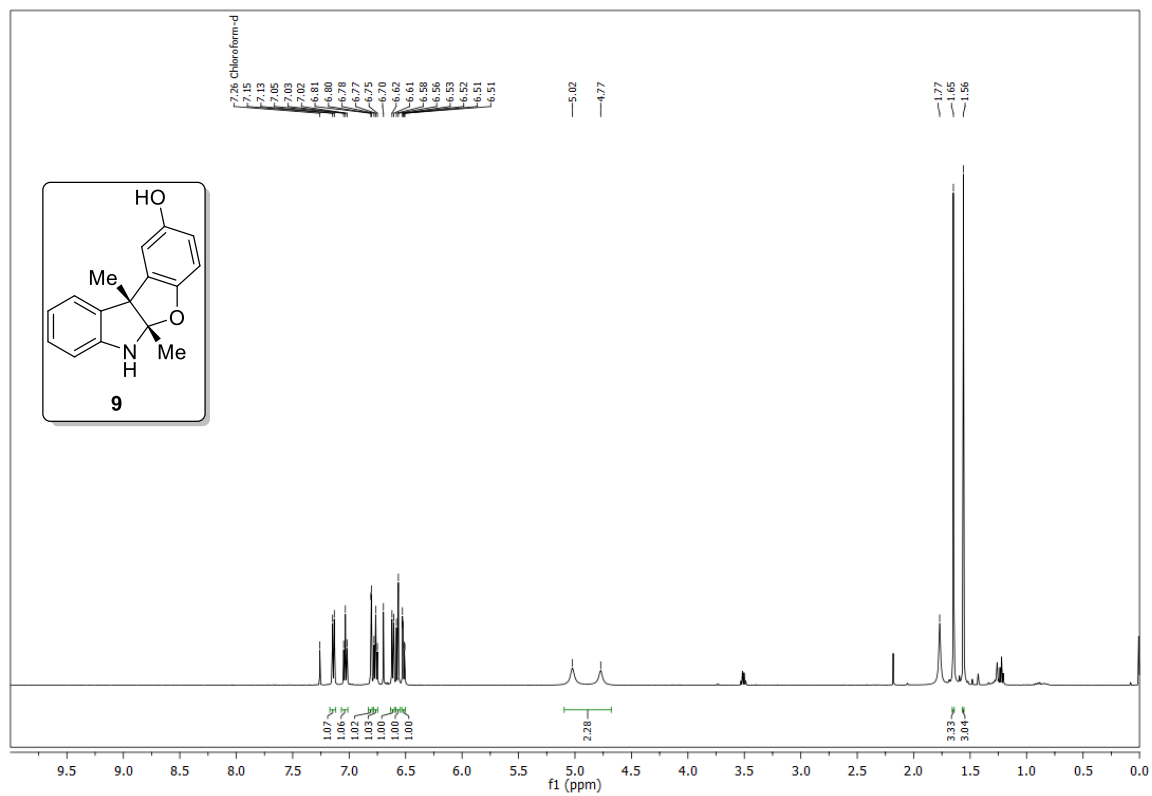



$^{13}\text{C}\{^1\text{H}\}$  NMR(126 MHz,  $\text{CDCl}_3$ ) of **9**

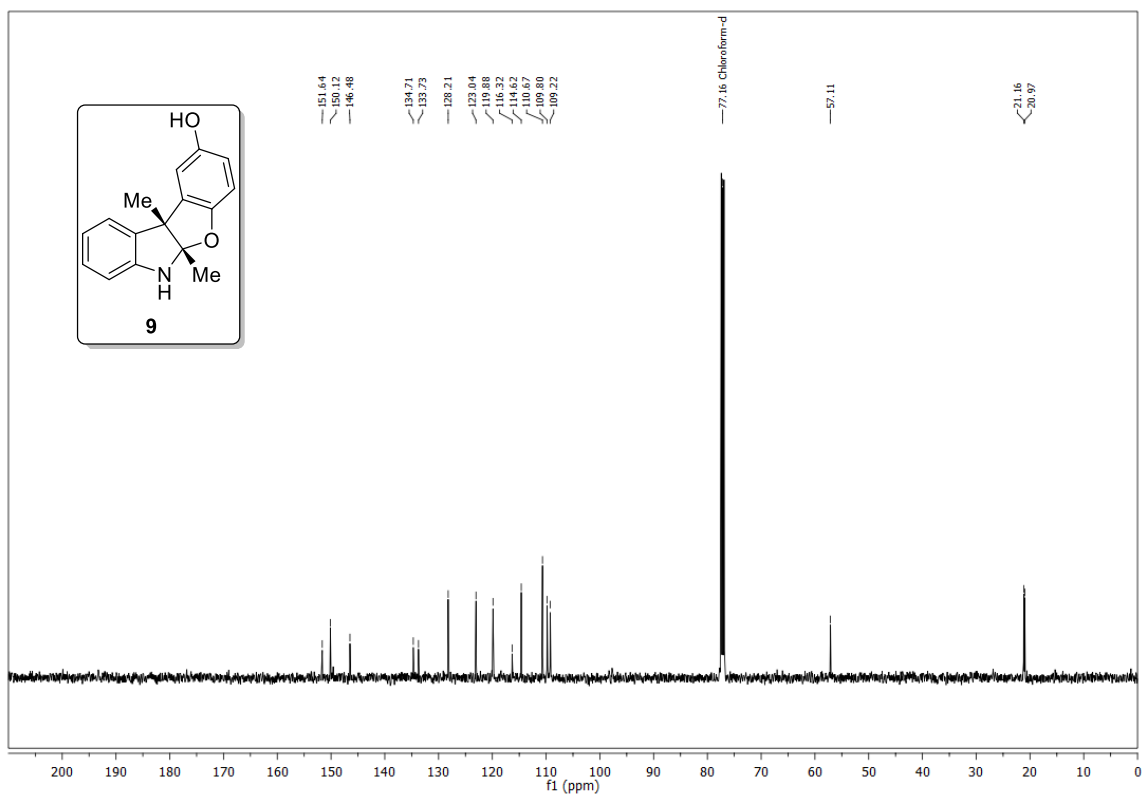

## 12. COMPUTATIONAL DETAILS-SUPPLEMENTARY DATA

### Computational Studies at B3LYP/def2-SVP level of theory.

All the equilibrium points were optimized using B3LYP/def2-SVP level of DFT theory. The transition states were identified by normal mode frequency analysis. Intrinsic reaction coordinates (IRC) calculations also confirmed the transition states reported in the present work.

| S.No. | Structure notation | Structures in 3D                                                                     |
|-------|--------------------|--------------------------------------------------------------------------------------|
| 1.    | 1a                 | 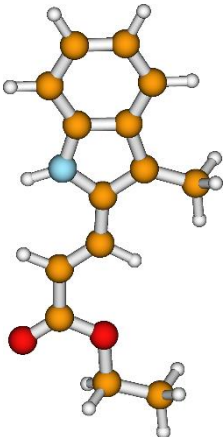  |
| 2.    | 2a                 |   |
| 3.    | TS1                |  |

|    |     |                                                                                      |
|----|-----|--------------------------------------------------------------------------------------|
| 4. | IM1 | 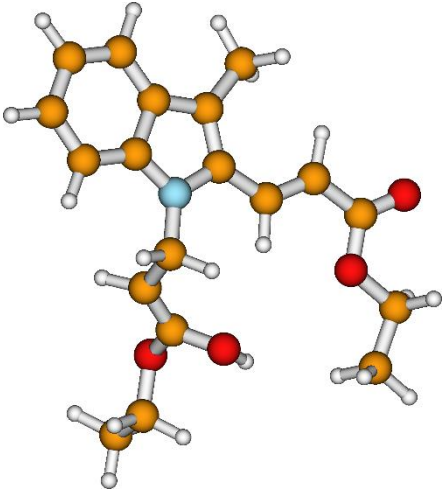   |
| 5. | TS2 |   |
| 6. | 3A  |  |

|    |        |                                                                                                                                                                                                                                                                                                                                                                                                                                                       |
|----|--------|-------------------------------------------------------------------------------------------------------------------------------------------------------------------------------------------------------------------------------------------------------------------------------------------------------------------------------------------------------------------------------------------------------------------------------------------------------|
| 7. | A      | 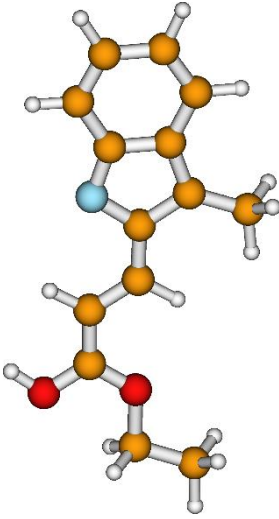 <p>A ball-and-stick model of a molecule. It features a benzene ring (orange carbons, white hydrogens) with a nitrogen atom (light blue) at the bottom vertex. A propyl chain (orange carbons, white hydrogens) is attached to the nitrogen atom, extending downwards.</p>                                                                                          |
| 8. | 1a-TS1 |  <p>A ball-and-stick model of a complex transition state structure. It shows a benzene ring (orange carbons, white hydrogens) with a nitrogen atom (light blue) at the bottom vertex. The structure is highly branched and includes several oxygen atoms (red) and carbon atoms (orange) in a complex arrangement, suggesting a multi-step reaction mechanism.</p> |
| 9. | 1a-IM1 |  <p>A ball-and-stick model of a complex intermediate structure. It features a benzene ring (orange carbons, white hydrogens) with a nitrogen atom (light blue) at the bottom vertex. The structure is highly branched and includes several oxygen atoms (red) and carbon atoms (orange) in a complex arrangement, suggesting a multi-step reaction mechanism.</p> |

|     |        |                                                                                      |
|-----|--------|--------------------------------------------------------------------------------------|
| 10. | 1a-TS2 | 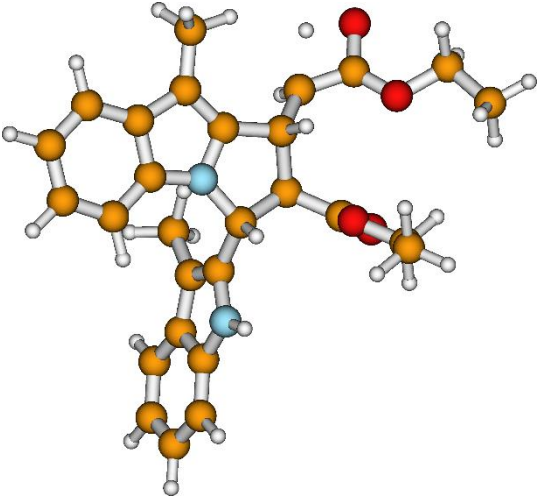   |
| 11. | 4a     |   |
| 12. | 3a     |  |

|     |        |                                                                                                                                                                                                                                                                                                                                                                                                                                                                                |
|-----|--------|--------------------------------------------------------------------------------------------------------------------------------------------------------------------------------------------------------------------------------------------------------------------------------------------------------------------------------------------------------------------------------------------------------------------------------------------------------------------------------|
| 13. | 1c     | 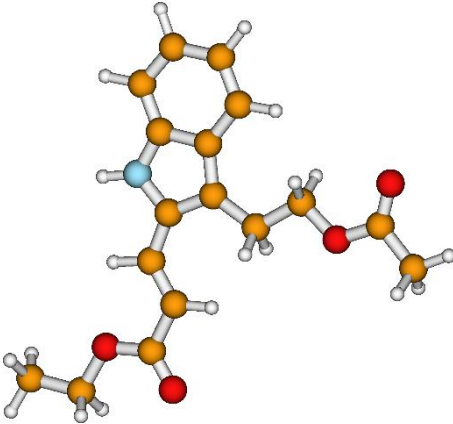 <p>A ball-and-stick model of a complex organic molecule. It features a central benzene ring with a blue nitrogen atom at the 1-position. Two propyl chains are attached to the ring at the 2 and 6 positions. The propyl chain at the 2-position is oriented downwards and to the left, while the propyl chain at the 6-position is oriented upwards and to the right.</p>                  |
| 14. | 1c'    |  <p>A ball-and-stick model of a complex organic molecule, similar to 1c. It features a central benzene ring with a blue nitrogen atom at the 1-position. Two propyl chains are attached to the ring at the 2 and 6 positions. The propyl chain at the 2-position is oriented downwards and to the left, while the propyl chain at the 6-position is oriented upwards and to the right.</p>  |
| 15. | 1c-TS1 |  <p>A ball-and-stick model of a complex organic molecule, similar to 1c. It features a central benzene ring with a blue nitrogen atom at the 1-position. Two propyl chains are attached to the ring at the 2 and 6 positions. The propyl chain at the 2-position is oriented downwards and to the left, while the propyl chain at the 6-position is oriented upwards and to the right.</p> |

|     |        |                                                                                      |
|-----|--------|--------------------------------------------------------------------------------------|
| 16. | 1c-IM1 | 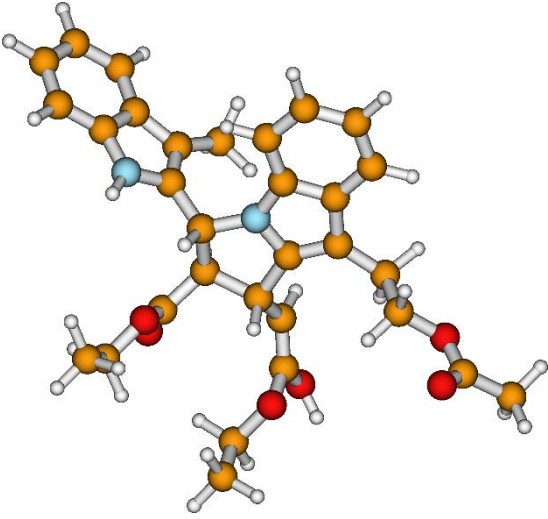   |
| 17. | 1c-TS2 |   |
| 18. | 4g     |  |

**Cartesian coordinates of all the stationary points. Energy is in hartree and frequency corresponding to transition state in cm<sup>-1</sup>:**

**1. 1a**

Energy= -746.770929.

-----  
CARTESIAN COORDINATES (ANGSTROMS)  
-----

|   |           |           |           |
|---|-----------|-----------|-----------|
| C | -0.749874 | 2.670948  | -0.003148 |
| C | 0.678601  | 2.703785  | -0.003585 |
| C | 1.339346  | 3.952356  | -0.006149 |
| C | 0.578651  | 5.116514  | -0.008211 |
| C | -0.837251 | 5.061861  | -0.007805 |
| C | -1.518463 | 3.847475  | -0.005306 |
| H | 2.431837  | 4.001474  | -0.006496 |
| H | 1.075282  | 6.090495  | -0.010195 |
| H | -1.407823 | 5.994792  | -0.009494 |
| H | -2.610663 | 3.808223  | -0.004995 |
| C | 1.136641  | 1.343123  | -0.001086 |
| C | -0.009580 | 0.539064  | 0.000882  |
| N | -1.134628 | 1.357395  | -0.000424 |
| H | -2.094303 | 1.033315  | 0.000277  |
| C | 2.568703  | 0.905255  | -0.000530 |
| H | 2.671398  | -0.189039 | 0.001665  |
| H | 3.102535  | 1.290482  | -0.886632 |
| H | 3.102927  | 1.294035  | 0.883785  |
| C | -0.076290 | -0.898565 | 0.003953  |
| C | -1.196081 | -1.665172 | 0.007583  |
| C | -1.187018 | -3.137035 | 0.010548  |
| O | -2.198389 | -3.817577 | 0.014710  |
| O | 0.050248  | -3.671481 | 0.007847  |
| C | 0.151486  | -5.107667 | 0.010111  |
| C | 1.620958  | -5.474983 | 0.006234  |
| H | 1.729899  | -6.570921 | 0.007794  |
| H | 2.124832  | -5.079438 | -0.889973 |
| H | 2.130339  | -5.076347 | 0.897947  |
| H | -0.371929 | -5.504040 | -0.875446 |
| H | -0.366511 | -5.500898 | 0.900242  |
| H | -2.202049 | -1.237015 | 0.008914  |
| H | 0.889356  | -1.409756 | 0.003354  |

**2. 2a**

Energy =-345.341202

-----  
CARTESIAN COORDINATES (ANGSTROMS)  
-----

|   |           |          |           |
|---|-----------|----------|-----------|
| C | -0.278541 | 3.036240 | -0.000128 |
|---|-----------|----------|-----------|



|   |           |           |           |
|---|-----------|-----------|-----------|
| C | -0.676906 | 1.758838  | 0.000106  |
| C | 0.305327  | 0.640718  | 0.000332  |
| O | 1.514147  | 0.763066  | 0.000035  |
| O | -0.318421 | -0.547321 | 0.000208  |
| C | 0.504594  | -1.731943 | 0.000044  |
| C | -0.410337 | -2.938511 | -0.000069 |
| H | -0.998763 | 3.858881  | -0.000269 |
| H | 0.786850  | 3.286875  | -0.000172 |
| H | -1.734479 | 1.480655  | 0.000156  |
| H | 0.192375  | -3.860216 | -0.000194 |
| H | -1.053744 | -2.946558 | 0.893951  |
| H | -1.053799 | -2.946350 | -0.894052 |
| H | 1.156591  | -1.709394 | -0.888347 |
| H | 1.156645  | -1.709600 | 0.888401  |

### 3. TS1

Energy = -1092.048103.

Imaginary Frequency = -324.33

-----  
 CARTESIAN COORDINATES (ANGSTROMS)  
 -----

|   |           |           |           |
|---|-----------|-----------|-----------|
| C | -1.419664 | 2.237288  | 0.039266  |
| C | -2.645814 | 1.559458  | -0.353149 |
| C | -2.295796 | 0.294453  | -0.872317 |
| N | -0.880907 | 0.126133  | -0.756328 |
| C | -0.372861 | 1.386250  | -0.239773 |
| C | -3.993042 | 1.950512  | -0.324467 |
| C | -4.954724 | 1.065073  | -0.818141 |
| C | -4.584585 | -0.187812 | -1.338019 |
| C | -3.243402 | -0.592800 | -1.376916 |
| C | 1.059375  | 1.550233  | -0.159178 |
| C | 1.740537  | 2.542541  | 0.464188  |
| C | 3.213972  | 2.647448  | 0.465240  |
| O | 3.823351  | 1.675427  | -0.237387 |
| C | 5.265768  | 1.667164  | -0.284708 |
| C | 5.859952  | 0.910957  | 0.891736  |
| C | -1.345380 | 3.624340  | 0.590614  |
| O | 3.812785  | 3.533198  | 1.048034  |
| C | -0.423030 | -1.249804 | 0.166579  |
| C | -0.579194 | -2.446735 | -0.634746 |
| C | -0.008565 | -2.395746 | -1.911867 |
| O | -0.046227 | -3.428964 | -2.797603 |
| C | -0.498410 | -4.729491 | -2.404650 |
| C | 0.553251  | -5.512038 | -1.631473 |
| O | 0.519344  | -1.332725 | -2.368067 |
| H | -6.009410 | 1.351957  | -0.807654 |

|   |           |           |           |
|---|-----------|-----------|-----------|
| H | -5.355062 | -0.858087 | -1.727639 |
| H | -2.955236 | -1.557931 | -1.792806 |
| H | -4.285123 | 2.926743  | 0.069936  |
| H | -1.050208 | 3.617824  | 1.654081  |
| H | -0.595921 | 4.228592  | 0.053385  |
| H | -2.315736 | 4.134393  | 0.514844  |
| H | 1.648957  | 0.787671  | -0.677047 |
| H | 1.248777  | 3.333175  | 1.030651  |
| H | 0.610274  | -0.938150 | 0.367649  |
| H | -1.033006 | -1.191060 | 1.076131  |
| H | 6.955113  | 0.857117  | 0.781142  |
| H | 5.635885  | 1.418510  | 1.842528  |
| H | 5.467009  | -0.117199 | 0.937693  |
| H | 5.509948  | 1.176240  | -1.237666 |
| H | 5.626616  | 2.705595  | -0.315326 |
| H | 1.483199  | -5.593313 | -2.216926 |
| H | 0.786386  | -5.029594 | -0.670165 |
| H | 0.185324  | -6.530532 | -1.425645 |
| H | -1.440351 | -4.652574 | -1.836081 |
| H | -0.732712 | -5.239354 | -3.351921 |
| H | -1.276823 | -3.223931 | -0.326124 |
| H | -0.335419 | -0.253615 | -1.630154 |

#### 4. IM1

Energy = -1092.088756.

-----  
 CARTESIAN COORDINATES (ANGSTROMS)  
 -----

|   |           |           |           |
|---|-----------|-----------|-----------|
| C | -5.712515 | 1.223484  | -0.890399 |
| C | -5.531981 | -0.120526 | -0.477338 |
| C | -4.296728 | -0.586615 | -0.039164 |
| C | -3.222379 | 0.324144  | -0.014869 |
| C | -3.384497 | 1.681249  | -0.432549 |
| C | -4.654036 | 2.122488  | -0.872311 |
| N | -1.917095 | 0.146712  | 0.369080  |
| C | -1.224913 | 1.355859  | 0.195102  |
| C | -2.114034 | 2.324793  | -0.294811 |
| C | -1.823742 | 3.755699  | -0.631449 |
| C | 0.182126  | 1.448761  | 0.504553  |
| C | 0.954665  | 2.566620  | 0.507494  |
| C | -1.352634 | -1.129066 | 0.822737  |
| C | -0.699379 | -1.928409 | -0.270456 |
| C | 0.601264  | -2.269981 | -0.274500 |

|   |           |           |           |
|---|-----------|-----------|-----------|
| O | 1.178564  | -2.874160 | -1.338070 |
| O | 1.417502  | -2.018032 | 0.783732  |
| C | 1.808038  | -4.154719 | -1.111334 |
| C | 2.343799  | -4.656718 | -2.435271 |
| C | 2.389485  | 2.578346  | 0.835423  |
| O | 3.053004  | 3.599795  | 0.892158  |
| O | 2.914878  | 1.358754  | 1.071519  |
| C | 4.701987  | -0.149625 | 1.587509  |
| C | 4.309621  | 1.304149  | 1.426212  |
| H | -6.699372 | 1.551364  | -1.228126 |
| H | -6.382323 | -0.807586 | -0.506279 |
| H | -4.171667 | -1.626789 | 0.268521  |
| H | -4.800898 | 3.157469  | -1.192986 |
| H | -1.558672 | 4.348925  | 0.261285  |
| H | -0.981816 | 3.849486  | -1.338317 |
| H | -2.700538 | 4.232427  | -1.093307 |
| H | 0.684125  | 0.513991  | 0.766904  |
| H | 0.560254  | 3.557068  | 0.286070  |
| H | -0.639895 | -0.935599 | 1.635257  |
| H | -2.184761 | -1.693057 | 1.271806  |
| H | -1.304516 | -2.250515 | -1.120808 |
| H | 2.319920  | -1.849455 | 0.464876  |
| H | 2.618820  | -4.049234 | -0.370730 |
| H | 1.054677  | -4.846679 | -0.693764 |
| H | 2.826985  | -5.636422 | -2.295629 |
| H | 1.531046  | -4.770418 | -3.169889 |
| H | 3.089839  | -3.957582 | -2.845438 |
| H | 5.761589  | -0.218536 | 1.879648  |
| H | 4.096850  | -0.639595 | 2.366740  |
| H | 4.572117  | -0.700962 | 0.641971  |
| H | 4.898686  | 1.801363  | 0.638759  |
| H | 4.461997  | 1.873366  | 2.358118  |

## 5. TS2

Energy = -1092.054107.

Imaginary Frequency = -669.89

---

### CARTESIAN COORDINATES (ANGSTROMS)

---

|   |           |           |           |
|---|-----------|-----------|-----------|
| C | 0.221703  | -1.048855 | 0.480693  |
| C | 0.760736  | 0.935296  | -0.078369 |
| C | -0.665825 | 1.360853  | -0.045004 |
| N | -1.605782 | 0.352666  | -0.135011 |

|   |           |           |           |
|---|-----------|-----------|-----------|
| C | -1.131010 | -1.019381 | -0.202464 |
| C | -1.287459 | 2.594930  | 0.017397  |
| C | -2.705318 | 2.317782  | -0.040015 |
| C | -2.867296 | 0.898583  | -0.139386 |
| C | -3.855508 | 3.132364  | -0.011086 |
| C | -5.113244 | 2.534901  | -0.082035 |
| C | -5.249687 | 1.131180  | -0.182095 |
| C | -4.132835 | 0.295708  | -0.213218 |
| C | -0.643705 | 3.945371  | 0.121251  |
| C | 1.458943  | 0.977590  | -1.315996 |
| C | 2.905390  | 1.211569  | -1.402224 |
| O | 3.537161  | 1.046381  | -0.214670 |
| C | 4.963268  | 1.234871  | -0.189624 |
| C | 5.413892  | 1.238819  | 1.256828  |
| C | 1.310924  | -1.730942 | -0.091635 |
| O | 2.285798  | -2.324141 | 0.584405  |
| C | 2.153597  | -2.611014 | 1.994321  |
| C | 3.236704  | -3.598914 | 2.373696  |
| O | 3.503870  | 1.500493  | -2.424821 |
| O | 1.533622  | -1.639843 | -1.363389 |
| H | -6.011048 | 3.159095  | -0.062239 |
| H | -6.249330 | 0.691238  | -0.238441 |
| H | -4.242074 | -0.788601 | -0.294424 |
| H | -3.762277 | 4.219746  | 0.064333  |
| H | -0.847636 | 4.565637  | -0.769695 |
| H | -1.022476 | 4.508817  | 0.991856  |
| H | 0.448849  | 3.864306  | 0.224685  |
| H | 1.353755  | 1.127818  | 0.820610  |
| H | 0.907744  | 1.243490  | -2.223563 |
| H | -1.843869 | -1.675789 | 0.322226  |
| H | -1.059843 | -1.365985 | -1.247465 |
| H | 0.171256  | -1.019413 | 1.571918  |
| H | 5.440306  | 0.421595  | -0.762478 |
| H | 5.210049  | 2.181075  | -0.696414 |
| H | 6.507710  | 1.358656  | 1.305962  |
| H | 5.148481  | 0.293944  | 1.757320  |
| H | 4.950946  | 2.070910  | 1.811434  |
| H | 1.149022  | -3.022995 | 2.183573  |
| H | 2.254400  | -1.667594 | 2.555632  |
| H | 4.237581  | -3.187774 | 2.170419  |
| H | 3.122909  | -4.540319 | 1.813945  |
| H | 3.166646  | -3.823480 | 3.449360  |
| H | 1.475347  | -0.575029 | -1.592847 |

## 6. 3A

Energy= -1092.133290.

---

### CARTESIAN COORDINATES (ANGSTROMS)

---

|   |           |           |           |
|---|-----------|-----------|-----------|
| C | -5.706444 | 0.776096  | 0.346357  |
| C | -5.625136 | -0.531739 | 0.877879  |
| C | -4.394114 | -1.157696 | 1.074598  |
| C | -3.238168 | -0.441123 | 0.727965  |
| C | -3.295451 | 0.887065  | 0.188725  |
| C | -4.557377 | 1.486741  | 0.000892  |
| N | -1.909939 | -0.778543 | 0.795593  |
| C | -1.139331 | 0.270846  | 0.337357  |
| C | -1.937525 | 1.326630  | -0.056612 |
| C | -1.514585 | 2.648445  | -0.626550 |
| C | -1.149587 | -1.925997 | 1.261175  |
| C | 0.272580  | -1.626826 | 0.733664  |
| C | 0.320439  | -0.078902 | 0.451223  |
| C | 1.029447  | 0.721259  | 1.580659  |
| C | 2.504357  | 0.371436  | 1.680964  |
| O | 2.898488  | -0.590224 | 2.306912  |
| O | 3.408132  | 1.114274  | 1.021741  |
| C | 4.346045  | 2.817902  | -0.366353 |
| C | 3.076141  | 2.313337  | 0.287771  |
| C | 0.614627  | -2.445524 | -0.507534 |
| O | -0.088444 | -3.293715 | -1.010800 |
| O | 1.829654  | -2.124794 | -0.965418 |
| C | 3.730136  | -2.345155 | -2.403616 |
| C | 2.327937  | -2.839514 | -2.119919 |
| H | -6.689120 | 1.235243  | 0.206019  |
| H | -6.544580 | -1.062793 | 1.140010  |
| H | -4.331529 | -2.168777 | 1.484736  |
| H | -4.634429 | 2.498033  | -0.409253 |
| H | -0.425519 | 2.690604  | -0.781618 |
| H | -1.996558 | 2.843575  | -1.600548 |
| H | -1.788356 | 3.489671  | 0.034849  |
| H | -1.165967 | -1.991721 | 2.362281  |
| H | -1.543255 | -2.865367 | 0.847292  |
| H | 1.036657  | -1.886955 | 1.481768  |
| H | 0.848016  | 0.119373  | -0.493592 |
| H | 0.871124  | 1.793826  | 1.411727  |
| H | 0.574941  | 0.461899  | 2.548208  |
| H | 4.131175  | 3.740427  | -0.928061 |
| H | 5.114336  | 3.042262  | 0.389982  |
| H | 4.750907  | 2.070653  | -1.066716 |
| H | 2.308858  | 2.086560  | -0.469400 |
| H | 2.667215  | 3.062345  | 0.985386  |
| H | 4.139105  | -2.875792 | -3.277666 |
| H | 3.733113  | -1.265648 | -2.622592 |
| H | 4.394267  | -2.529709 | -1.544637 |

H 2.307179 -3.918515 -1.899261  
H 1.646112 -2.658506 -2.966232

## 7. A

Energy = -746.712482.

-----  
CARTESIAN COORDINATES (ANGSTROMS)  
-----

C -0.772330 2.534171 -0.039792  
C 0.682299 2.670898 -0.007211  
C 1.279956 3.965361 0.009063  
C 0.463499 5.076988 -0.005686  
C -0.965759 4.944270 -0.037098  
C -1.582595 3.710796 -0.053927  
H 2.368921 4.073919 0.032838  
H 0.900334 6.079596 0.006408  
H -1.575181 5.853240 -0.047833  
H -2.672438 3.619319 -0.077819  
C 1.188293 1.363905 0.000397  
C 0.010141 0.523115 -0.028138  
N -1.165371 1.255808 -0.052529  
C 2.626621 0.946042 0.029754  
H 2.745386 -0.147558 0.028337  
H 3.179607 1.339362 -0.841837  
H 3.142051 1.333161 0.926765  
C 0.014747 -0.878180 -0.032798  
C -1.134903 -1.673278 -0.066117  
C -1.098321 -3.066508 -0.071437  
O -2.180627 -3.824611 -0.108036  
O 0.037938 -3.720150 -0.039888  
C 0.063661 -5.174625 -0.045401  
C 1.512413 -5.604440 -0.001121  
H 1.563391 -6.704287 -0.004110  
H 2.063115 -5.229627 -0.877759  
H 2.006150 -5.237001 0.911811  
H -0.444778 -5.526539 -0.955992  
H -0.501324 -5.534051 0.828149  
H -2.113809 -1.189773 -0.092333  
H 0.984443 -1.383761 -0.009660  
H -2.988452 -3.282610 -0.132631

## 8. 1a-TS1

Energy = -1493.440604.

Imaginary Frequency = -291.66

-----  
CARTESIAN COORDINATES (ANGSTROMS)  
-----

|   |           |           |           |
|---|-----------|-----------|-----------|
| N | -0.993036 | 0.553288  | 0.109184  |
| C | -0.297029 | 1.761675  | 0.042575  |
| C | 1.063335  | 1.793205  | -0.332138 |
| C | -1.175460 | 2.855858  | 0.326939  |
| C | -2.437378 | 2.274884  | 0.572675  |
| C | -2.269921 | 0.844088  | 0.445197  |
| C | -3.709337 | 2.818106  | 0.901117  |
| C | -4.766839 | 1.957305  | 1.119664  |
| C | -4.590000 | 0.545022  | 1.015089  |
| C | -3.371052 | -0.021511 | 0.685722  |
| C | -0.866552 | 4.320255  | 0.311253  |
| C | 1.944922  | 2.868304  | -0.330768 |
| C | 3.293099  | 2.681434  | -0.689864 |
| O | 3.714036  | 1.527727  | -1.120275 |
| C | 5.134890  | 1.220343  | -1.277675 |
| C | 5.752358  | 0.835548  | 0.053035  |
| O | 4.197199  | 3.632968  | -0.611532 |
| H | -5.753304 | 2.353015  | 1.375352  |
| H | -5.448895 | -0.108060 | 1.195116  |
| H | -3.269950 | -1.103271 | 0.598165  |
| H | -3.845294 | 3.900313  | 0.981038  |
| H | 1.665422  | 3.869174  | -0.003152 |
| H | 6.771638  | 0.456226  | -0.122401 |
| H | 5.820600  | 1.700956  | 0.730066  |
| H | 5.157447  | 0.048007  | 0.540586  |
| H | 5.131031  | 0.379128  | -1.982240 |
| H | 5.632554  | 2.079734  | -1.746880 |
| H | 3.815179  | 4.466863  | -0.285196 |
| H | 1.483205  | 0.836695  | -0.641181 |
| H | 1.740133  | -1.471884 | -0.346087 |
| C | 1.128200  | -1.202321 | 0.516918  |
| C | 1.842698  | -0.889133 | 1.706950  |
| O | 1.028752  | -0.497725 | 2.752425  |
| C | 1.659462  | -0.227390 | 4.003838  |
| C | 0.602274  | 0.272365  | 4.970484  |
| H | 1.057786  | 0.491141  | 5.949552  |
| H | -0.187237 | -0.482128 | 5.119060  |

|   |           |           |           |
|---|-----------|-----------|-----------|
| H | 0.130618  | 1.194999  | 4.595202  |
| H | 2.144592  | -1.144141 | 4.384082  |
| H | 2.459939  | 0.519120  | 3.864512  |
| O | 3.068335  | -0.941597 | 1.869371  |
| C | -0.287722 | -1.141787 | 0.394433  |
| H | -0.812927 | -1.246223 | 1.349049  |
| C | -0.909020 | -1.979648 | -0.670983 |
| N | -1.748967 | -3.019450 | -0.287885 |
| H | -1.950741 | -3.269749 | 0.673517  |
| C | -2.164086 | -3.719371 | -1.394990 |
| C | -2.992776 | -4.845501 | -1.510147 |
| H | -3.425161 | -5.321440 | -0.625910 |
| C | -3.246017 | -5.334033 | -2.792268 |
| H | -3.888669 | -6.210369 | -2.915521 |
| C | -2.686829 | -4.715983 | -3.934602 |
| C | -1.861352 | -3.598809 | -3.816385 |
| H | -1.432495 | -3.130473 | -4.707146 |
| H | -2.906581 | -5.124733 | -4.925032 |
| C | -1.583202 | -3.084136 | -2.532956 |
| C | -0.786672 | -1.980615 | -2.052448 |
| C | -0.011156 | -1.037504 | -2.922808 |
| H | 0.778820  | -1.563567 | -3.488014 |
| H | 0.471330  | -0.244011 | -2.338602 |
| H | -0.662804 | -0.551778 | -3.670620 |
| H | -0.409570 | 4.634049  | -0.642720 |
| H | -1.780512 | 4.914914  | 0.453324  |
| H | -0.161310 | 4.601628  | 1.112933  |

### 9. 1a-IM1

Energy = -1493.509746.

-----  
 CARTESIAN COORDINATES (ANGSTROMS)  
 -----

|   |           |           |           |
|---|-----------|-----------|-----------|
| C | -4.337247 | 2.512642  | -0.940371 |
| C | -4.656759 | 1.148449  | -0.773503 |
| C | -3.603155 | 0.216580  | -0.533317 |
| C | -2.258718 | 0.613871  | -0.454271 |
| C | -1.975251 | 1.968208  | -0.621806 |
| C | -3.004230 | 2.909229  | -0.863321 |
| N | -4.179454 | -1.023611 | -0.415186 |
| C | -5.554667 | -0.917323 | -0.563160 |
| C | -5.895214 | 0.407550  | -0.787191 |
| C | -6.398169 | -2.159276 | -0.442182 |
| N | -7.336022 | -2.373248 | -1.542396 |



|   |            |           |           |
|---|------------|-----------|-----------|
| C | -8.566930  | -2.872854 | -1.158993 |
| C | -8.631372  | -3.008793 | 0.342831  |
| C | -7.361090  | -2.173087 | 0.784949  |
| C | -9.336517  | -3.167597 | -2.265561 |
| C | -8.506086  | -2.840479 | -3.406666 |
| C | -7.247026  | -2.361790 | -2.915967 |
| C | -8.705955  | -2.918327 | -4.799573 |
| C | -7.674029  | -2.539684 | -5.657959 |
| C | -6.436382  | -2.082239 | -5.152178 |
| C | -6.205900  | -1.986369 | -3.779032 |
| C | -9.907083  | -2.551826 | 0.987125  |
| C | -10.545427 | -3.220855 | 1.965512  |
| O | -10.176269 | -4.461720 | 2.363984  |
| C | -9.892000  | -4.648548 | 3.770528  |
| C | -9.420505  | -6.072891 | 3.970820  |
| C | -6.784850  | -2.703458 | 2.080444  |
| O | -5.905262  | -3.695092 | 1.893955  |
| C | -5.333573  | -4.318332 | 3.067639  |
| C | -4.284159  | -5.308725 | 2.610290  |
| C | -7.255439  | 1.002097  | -1.010467 |
| O | -11.610620 | -2.680750 | 2.608808  |
| O | -7.126439  | -2.309719 | 3.175937  |
| H | -7.820179  | -2.600153 | -6.740178 |
| H | -5.642615  | -1.798233 | -5.848842 |
| H | -5.247635  | -1.635325 | -3.391054 |
| H | -9.657497  | -3.277401 | -5.202657 |
| H | -5.716312  | -3.023732 | -0.376045 |
| H | -7.692455  | -1.147042 | 0.993002  |
| H | -8.461057  | -4.065939 | 0.609934  |
| H | -10.337784 | -1.599454 | 0.667888  |
| H | -3.683153  | -1.889480 | -0.236762 |
| H | -1.464592  | -0.114036 | -0.267990 |
| H | -0.937986  | 2.310231  | -0.565785 |
| H | -2.744241  | 3.963900  | -0.990137 |
| H | -5.124978  | 3.248319  | -1.126620 |
| H | -3.836995  | -5.801968 | 3.487553  |
| H | -4.724779  | -6.085699 | 1.965868  |
| H | -3.479945  | -4.804101 | 2.051820  |
| H | -4.908441  | -3.531801 | 3.710292  |
| H | -6.143803  | -4.808867 | 3.630674  |
| H | -9.216049  | -6.250209 | 5.038384  |
| H | -10.189495 | -6.789854 | 3.641806  |
| H | -8.496112  | -6.267076 | 3.403932  |
| H | -9.118307  | -3.920697 | 4.069575  |

|   |            |           |           |
|---|------------|-----------|-----------|
| H | -10.799616 | -4.448466 | 4.364477  |
| H | -8.042901  | 0.237600  | -1.056687 |
| H | -7.523036  | 1.710577  | -0.206728 |
| H | -7.290573  | 1.569763  | -1.956486 |
| H | -12.212663 | -3.389142 | 2.891170  |
| C | -10.726014 | -3.731608 | -2.311663 |
| H | -11.139046 | -3.857547 | -1.300251 |
| H | -11.413697 | -3.077443 | -2.876192 |
| H | -10.748829 | -4.717208 | -2.809773 |

## 10. 1a-TS2

Energy = -1493.440850.

Imaginary Frequency = -2041.00

---

### CARTESIAN COORDINATES (ANGSTROMS)

---

|   |           |           |           |
|---|-----------|-----------|-----------|
| C | -6.184165 | -2.014077 | -3.747223 |
| C | -7.233412 | -2.375440 | -2.875775 |
| C | -8.486761 | -2.771637 | -3.431160 |
| C | -8.708770 | -2.816123 | -4.816967 |
| C | -7.653131 | -2.453604 | -5.651506 |
| C | -6.402255 | -2.055690 | -5.122386 |
| N | -9.321421 | -3.060689 | -2.380655 |
| C | -8.649969 | -2.868393 | -1.181844 |
| C | -7.355286 | -2.445408 | -1.439416 |
| C | -9.373728 | -3.139555 | 0.110234  |
| N | -9.322748 | -2.050904 | 1.080959  |
| C | -9.206856 | -2.460052 | 2.398027  |
| C | -9.103964 | -3.966788 | 2.463168  |
| C | -8.796993 | -4.322749 | 0.955459  |
| C | -9.303421 | -1.375958 | 3.247616  |
| C | -9.512108 | -0.229781 | 2.386031  |
| C | -9.539082 | -0.692693 | 1.030372  |
| C | -9.691497 | 1.145470  | 2.637161  |
| C | -9.901200 | 2.011831  | 1.564390  |
| C | -9.936638 | 1.531225  | 0.236116  |
| C | -9.755583 | 0.177098  | -0.049651 |
| C | -9.245750 | -1.345511 | 4.746469  |
| C | -8.110883 | -4.500111 | 3.471367  |
| C | -8.217596 | -5.797146 | 4.072788  |
| O | -8.874978 | -6.825607 | 3.616505  |
| C | -9.051817 | -7.989261 | 4.482224  |
| C | -9.895953 | -8.999578 | 3.740410  |

|   |            |           |           |
|---|------------|-----------|-----------|
| C | -9.311229  | -5.681600 | 0.524521  |
| O | -10.650812 | -5.732453 | 0.511687  |
| C | -11.272969 | -6.977967 | 0.123158  |
| C | -12.772330 | -6.770175 | 0.109746  |
| C | -6.268087  | -2.105754 | -0.461849 |
| O | -7.640905  | -5.799961 | 5.226795  |
| O | -8.604059  | -6.620337 | 0.229774  |
| H | -10.044996 | 3.079888  | 1.750978  |
| H | -10.110709 | 2.232341  | -0.585022 |
| H | -9.787754  | -0.191096 | -1.076918 |
| H | -9.673155  | 1.527377  | 3.662119  |
| H | -10.428184 | -3.357965 | -0.133924 |
| H | -7.707265  | -4.351851 | 0.825988  |
| H | -10.105608 | -4.366260 | 2.706367  |
| H | -7.057200  | -4.273528 | 3.243824  |
| H | -10.285491 | -3.363869 | -2.461640 |
| H | -9.675560  | -3.123211 | -5.224536 |
| H | -7.794169  | -2.476319 | -6.735783 |
| H | -5.596585  | -1.777658 | -5.807634 |
| H | -5.213324  | -1.705725 | -3.348763 |
| H | -13.271573 | -7.706863 | -0.184057 |
| H | -13.141864 | -6.480313 | 1.106057  |
| H | -13.057184 | -5.987422 | -0.610999 |
| H | -10.887224 | -7.270095 | -0.866339 |
| H | -10.972228 | -7.756775 | 0.841483  |
| H | -10.043462 | -9.885162 | 4.377956  |
| H | -10.884605 | -8.584791 | 3.489571  |
| H | -9.398923  | -9.321169 | 2.812090  |
| H | -8.054559  | -8.384285 | 4.724442  |
| H | -9.524393  | -7.644978 | 5.415095  |
| H | -6.607042  | -2.177112 | 0.580578  |
| H | -5.397775  | -2.775303 | -0.578922 |
| H | -5.898820  | -1.077417 | -0.619395 |
| H | -7.699713  | -4.580209 | 4.940946  |
| H | -9.029080  | -2.341761 | 5.156758  |
| H | -8.464232  | -0.654466 | 5.108978  |
| H | -10.199608 | -0.998527 | 5.182709  |

#### 11. 4a

Energy = -1493.560792.

-----  
 CARTESIAN COORDINATES (ANGSTROMS)  
 -----

|   |           |           |           |
|---|-----------|-----------|-----------|
| C | -0.156825 | -2.461602 | 3.394360  |
| C | -0.029705 | -2.309835 | 2.004117  |
| C | 0.208652  | -3.422898 | 1.142064  |
| C | 0.321343  | -4.712277 | 1.701816  |
| C | 0.195589  | -4.864340 | 3.081366  |
| C | -0.042399 | -3.748651 | 3.918171  |
| N | -0.095419 | -1.186441 | 1.218887  |
| C | 0.087727  | -1.542991 | -0.107446 |
| C | 0.281045  | -2.911180 | -0.206724 |
| C | 0.517161  | -3.734859 | -1.437578 |
| C | 0.053393  | -0.493634 | -1.180961 |
| N | 1.073209  | 0.541539  | -1.014679 |
| C | 0.624016  | 1.844443  | -1.094678 |
| C | -0.867642 | 1.867328  | -1.296410 |
| C | -1.271552 | 0.366224  | -1.207497 |
| C | 1.682183  | 2.727641  | -1.021776 |
| C | 2.863332  | 1.899107  | -0.892909 |
| C | 2.445790  | 0.528611  | -0.904003 |
| C | 3.362644  | -0.530191 | -0.819552 |
| C | 4.716620  | -0.207287 | -0.716329 |
| C | 5.150549  | 1.137163  | -0.697318 |
| C | 4.238274  | 2.188575  | -0.784302 |
| C | -2.212789 | -0.069552 | -2.320426 |
| O | -2.545928 | -1.356650 | -2.185805 |
| C | -3.434702 | -1.928612 | -3.174490 |
| C | -3.688048 | -3.372431 | -2.797190 |
| C | -1.656730 | 2.792685  | -0.356268 |
| C | -1.427909 | 2.584157  | 1.127218  |
| O | -0.904964 | 1.612137  | 1.640141  |
| C | 1.662614  | 4.227271  | -1.079064 |
| O | -1.898549 | 3.608063  | 1.837641  |
| C | -1.800505 | 3.532105  | 3.280684  |
| C | -2.411193 | 4.791050  | 3.857148  |
| O | -2.624395 | 0.641709  | -3.210673 |
| H | -0.281503 | -0.233918 | 1.534369  |
| H | 0.281290  | -5.859114 | 3.527537  |
| H | 0.504996  | -5.581152 | 1.063015  |
| H | 0.200074  | -0.996671 | -2.150080 |
| H | -1.809903 | 0.179494  | -0.267831 |
| H | -1.090906 | 2.212958  | -2.319058 |
| H | -1.445069 | 3.848819  | -0.581764 |
| H | -2.739367 | 2.668563  | -0.537418 |
| H | -0.738716 | 3.424898  | 3.553240  |
| H | -2.325907 | 2.625021  | 3.619421  |

|   |           |           |           |
|---|-----------|-----------|-----------|
| H | -1.875700 | 5.687174  | 3.506268  |
| H | -2.348866 | 4.759783  | 4.956189  |
| H | -3.471580 | 4.882308  | 3.573756  |
| H | 3.029398  | -1.569839 | -0.833244 |
| H | 5.454629  | -1.011574 | -0.648909 |
| H | 6.219463  | 1.353410  | -0.614708 |
| H | 4.586027  | 3.225724  | -0.772071 |
| H | 2.351130  | 4.607879  | -1.853496 |
| H | 1.981115  | 4.681489  | -0.123599 |
| H | 0.659976  | 4.615491  | -1.311739 |
| H | -0.137833 | -3.898873 | 4.997330  |
| H | -0.340480 | -1.599270 | 4.040558  |
| H | 0.571245  | -3.118273 | -2.346718 |
| H | -0.287693 | -4.475867 | -1.588390 |
| H | 1.460754  | -4.303339 | -1.365499 |
| H | -2.960944 | -1.837739 | -4.165070 |
| H | -2.749157 | -3.947948 | -2.780331 |
| H | -4.362190 | -3.832925 | -3.536296 |
| H | -4.161304 | -3.444541 | -1.805374 |
| H | -4.363775 | -1.337183 | -3.192962 |

## 12. 3a

Energy = -1838.886960.

---

### CARTESIAN COORDINATES (ANGSTROMS)

---

|   |           |           |           |
|---|-----------|-----------|-----------|
| C | 0.116534  | -5.752868 | 0.857795  |
| C | -0.305012 | -4.480657 | 0.429145  |
| C | 0.307677  | -3.310595 | 0.991254  |
| C | 1.266107  | -3.414285 | 2.014803  |
| C | 1.657811  | -4.691789 | 2.420398  |
| C | 1.100581  | -5.851039 | 1.841174  |
| N | -0.298951 | -2.220246 | 0.389046  |
| C | -1.309672 | -2.679540 | -0.451514 |
| C | -1.345174 | -4.052108 | -0.481940 |
| C | -2.086693 | -1.516414 | -1.000773 |
| C | -1.652394 | -0.357785 | -0.017684 |
| C | -0.290390 | -0.798213 | 0.494418  |
| C | 0.782418  | -0.026369 | 0.800448  |
| N | 2.074890  | -0.512088 | 0.999606  |
| C | 2.902053  | 0.432672  | 1.587030  |
| C | 2.205265  | 1.650766  | 1.703308  |
| C | 0.827422  | 1.509477  | 1.040477  |

|   |           |           |           |
|---|-----------|-----------|-----------|
| C | 2.817566  | 2.732612  | 2.327766  |
| C | 4.135814  | 2.602706  | 2.806671  |
| C | 4.823023  | 1.393486  | 2.654398  |
| C | 4.214172  | 0.285567  | 2.044908  |
| C | 0.820128  | 2.236858  | -0.343472 |
| C | 0.973158  | 3.757297  | -0.294159 |
| C | 0.901575  | 4.394186  | -1.669038 |
| O | 1.096846  | 5.724697  | -1.757538 |
| C | 1.390136  | 6.557603  | -0.618610 |
| C | 1.525838  | 7.983707  | -1.113165 |
| C | -0.306764 | 2.005891  | 1.956353  |
| C | -1.848929 | -1.210040 | -2.503965 |
| C | -0.410463 | -0.914349 | -2.872914 |
| O | 0.293784  | -2.032435 | -3.089274 |
| C | 1.699787  | -1.890495 | -3.393281 |
| C | 2.267265  | -3.272552 | -3.638075 |
| C | -2.696677 | -0.251032 | 1.092355  |
| O | -2.681846 | -0.870249 | 2.132573  |
| C | -2.272837 | -4.936070 | -1.259771 |
| O | -3.669610 | 0.602370  | 0.748362  |
| C | -4.775951 | 0.759914  | 1.667182  |
| C | -5.753045 | 1.744231  | 1.060673  |
| O | 0.063701  | 0.198915  | -2.956434 |
| O | 0.673149  | 3.782063  | -2.688216 |
| H | 4.619522  | 3.449094  | 3.300728  |
| H | 2.285431  | 3.678255  | 2.459701  |
| H | -1.623071 | 0.599888  | -0.548863 |
| H | -3.167819 | -1.702876 | -0.908443 |
| H | -2.194623 | -2.077830 | -3.085250 |
| H | -2.451674 | -0.335151 | -2.787320 |
| H | 2.192217  | -1.388740 | -2.544624 |
| H | 1.806120  | -1.237631 | -4.274076 |
| H | 2.147937  | -3.911772 | -2.749155 |
| H | 3.341868  | -3.195895 | -3.866759 |
| H | 1.767253  | -3.760315 | -4.489777 |
| H | 1.678709  | -2.533257 | 2.506411  |
| H | 2.403355  | -4.790730 | 3.214244  |
| H | 1.431730  | -6.835815 | 2.182134  |
| H | -0.334973 | -6.654152 | 0.433263  |
| H | -2.743749 | -5.695540 | -0.612427 |
| H | -1.742868 | -5.484026 | -2.059169 |
| H | -3.077126 | -4.354282 | -1.735537 |
| H | 5.847432  | 1.300825  | 3.026384  |
| H | 4.742172  | -0.666014 | 1.945957  |

|   |           |           |           |
|---|-----------|-----------|-----------|
| H | -5.235489 | -0.227228 | 1.834632  |
| H | -5.279277 | 2.725472  | 0.899758  |
| H | -6.607956 | 1.881526  | 1.741234  |
| H | -6.136074 | 1.377588  | 0.095190  |
| H | 1.754842  | 8.650372  | -0.267077 |
| H | 0.590900  | 8.326887  | -1.583322 |
| H | 2.339361  | 8.066620  | -1.850872 |
| H | 2.324088  | 6.215367  | -0.143452 |
| H | 0.577419  | 6.472626  | 0.121328  |
| H | -0.112283 | 1.994085  | -0.872744 |
| H | 1.626665  | 1.816591  | -0.963952 |
| H | 0.189367  | 4.224193  | 0.326878  |
| H | -1.274700 | 2.023057  | 1.432974  |
| H | -0.106995 | 3.031822  | 2.301394  |
| H | -0.401677 | 1.364277  | 2.844728  |
| H | -4.380355 | 1.111870  | 2.633254  |
| H | 2.358163  | -1.465424 | 0.814388  |
| H | 1.929315  | 4.047911  | 0.169078  |

### 13. 1c

Energy = -1013.621493.

-----  
 CARTESIAN COORDINATES (ANGSTROMS)  
 -----

|   |           |           |           |
|---|-----------|-----------|-----------|
| C | -4.656484 | -1.489571 | -0.000040 |
| C | -4.350139 | -2.873247 | -0.000122 |
| C | -3.032984 | -3.312369 | -0.000165 |
| C | -2.019424 | -2.337030 | -0.000127 |
| C | -2.295431 | -0.929945 | -0.000044 |
| C | -3.656741 | -0.526021 | -0.000002 |
| N | -0.666370 | -2.494809 | -0.000157 |
| C | -0.040043 | -1.255037 | -0.000096 |
| C | -1.023637 | -0.252202 | -0.000026 |
| C | -0.711407 | 1.222890  | 0.000045  |
| C | 1.402284  | -1.218866 | -0.000116 |
| C | 2.233896  | -0.146348 | -0.000048 |
| C | -1.901819 | 2.168260  | 0.000089  |
| C | 3.704086  | -0.256205 | -0.000079 |
| O | 4.447645  | 0.709257  | 0.000004  |
| O | 4.157799  | -1.524161 | -0.000206 |
| C | 5.859125  | -3.205741 | -0.000380 |
| C | 5.585168  | -1.716200 | -0.000240 |
| O | -1.365918 | 3.504004  | 0.000146  |

|   |           |           |           |
|---|-----------|-----------|-----------|
| O | -3.448222 | 4.347798  | 0.000133  |
| C | -2.248880 | 4.518182  | 0.000173  |
| C | -1.552835 | 5.854849  | 0.000212  |
| H | -5.703519 | -1.174974 | -0.000007 |
| H | -5.163411 | -3.604144 | -0.000150 |
| H | -2.784285 | -4.376623 | -0.000228 |
| H | -3.938052 | 0.526905  | 0.000061  |
| H | -0.180804 | -3.385217 | -0.000216 |
| H | -0.088747 | 1.468777  | 0.879168  |
| H | -0.088748 | 1.468859  | -0.879055 |
| H | 1.879304  | -2.204980 | -0.000194 |
| H | 1.878399  | 0.882939  | 0.000039  |
| H | -2.535568 | 2.038927  | -0.890505 |
| H | -2.535563 | 2.038851  | 0.890676  |
| H | 6.946151  | -3.382709 | -0.000407 |
| H | 5.431533  | -3.686753 | 0.893684  |
| H | 5.431515  | -3.686588 | -0.894523 |
| H | 6.011717  | -1.220917 | -0.887932 |
| H | 6.011739  | -1.221079 | 0.887532  |
| H | -2.296089 | 6.661433  | 0.000179  |
| H | -0.905506 | 5.938930  | 0.887319  |
| H | -0.905412 | 5.938939  | -0.886825 |

#### 14. 1c'

Energy = -1013.557853.

-----  
 CARTESIAN COORDINATES (ANGSTROMS)  
 -----

|   |           |           |           |
|---|-----------|-----------|-----------|
| C | -4.619314 | -1.496313 | -0.000009 |
| C | -4.283323 | -2.892463 | -0.000122 |
| C | -2.972859 | -3.310301 | -0.000183 |
| C | -1.932506 | -2.329308 | -0.000132 |
| C | -2.266200 | -0.901187 | -0.000013 |
| C | -3.648229 | -0.519576 | 0.000044  |
| N | -0.618777 | -2.547150 | -0.000180 |
| C | -0.039457 | -1.284497 | -0.000086 |
| C | -1.033496 | -0.226396 | 0.000014  |
| C | -0.717606 | 1.246320  | 0.000103  |
| C | 1.361831  | -1.221262 | -0.000094 |
| C | 2.225454  | -0.121293 | 0.000047  |
| C | -1.907762 | 2.191356  | 0.000114  |
| C | 3.613233  | -0.277141 | 0.000024  |
| O | 4.365264  | 0.809106  | 0.000227  |



|   |           |           |           |
|---|-----------|-----------|-----------|
| O | 4.156283  | -1.474528 | -0.000198 |
| C | 5.841342  | -3.174480 | -0.000553 |
| C | 5.592612  | -1.682578 | -0.000215 |
| O | -1.376001 | 3.530752  | 0.000156  |
| O | -3.459750 | 4.371861  | 0.000052  |
| C | -2.260283 | 4.542606  | 0.000151  |
| C | -1.566535 | 5.880972  | 0.000088  |
| H | -5.674575 | -1.208585 | 0.000036  |
| H | -5.092315 | -3.629201 | -0.000160 |
| H | -2.708823 | -4.371746 | -0.000269 |
| H | -3.950386 | 0.528736  | 0.000131  |
| H | -0.094967 | 1.495598  | 0.879118  |
| H | -0.094920 | 1.495685  | -0.878855 |
| H | 1.833368  | -2.209474 | -0.000215 |
| H | 1.876259  | 0.908953  | 0.000215  |
| H | -2.541645 | 2.060708  | -0.890148 |
| H | -2.541666 | 2.060664  | 0.890354  |
| H | 6.926469  | -3.359073 | -0.000566 |
| H | 5.407293  | -3.644056 | 0.895188  |
| H | 5.407342  | -3.643642 | -0.896534 |
| H | 6.017267  | -1.206253 | -0.900211 |
| H | 6.017224  | -1.206666 | 0.900020  |
| H | -2.311020 | 6.686460  | 0.000016  |
| H | -0.919525 | 5.966441  | 0.887307  |
| H | -0.919471 | 5.966334  | -0.887104 |
| H | 5.320871  | 0.630775  | 0.000235  |

### 15. 1c-TS1

Energy = -1760.297510.

Imaginary Frequency = -294.92.

-----  
 CARTESIAN COORDINATES (ANGSTROMS)  
 -----

|   |           |           |           |
|---|-----------|-----------|-----------|
| N | -0.976536 | -0.296452 | -0.150932 |
| C | -0.269952 | 0.897133  | -0.289265 |
| C | 1.104574  | 0.878831  | -0.630446 |
| C | -1.152514 | 2.011448  | -0.135583 |
| C | -2.427627 | 1.457551  | 0.110779  |
| C | -2.265288 | 0.022546  | 0.112389  |
| C | -3.706829 | 2.033690  | 0.335910  |
| C | -4.778567 | 1.198816  | 0.586368  |
| C | -4.607599 | -0.217051 | 0.613255  |

|   |           |           |           |
|---|-----------|-----------|-----------|
| C | -3.380366 | -0.814839 | 0.383108  |
| C | -0.862105 | 3.479460  | -0.263214 |
| C | -0.501522 | 4.123844  | 1.075121  |
| O | -0.268773 | 5.522790  | 0.833572  |
| C | 0.041538  | 6.288061  | 1.895572  |
| C | 0.230220  | 7.730061  | 1.500694  |
| C | 2.026371  | 1.915609  | -0.620255 |
| C | 3.371454  | 1.676434  | -0.970473 |
| O | 3.749288  | 0.509337  | -1.398269 |
| C | 5.159458  | 0.153588  | -1.564562 |
| C | 5.784339  | -0.215627 | -0.232996 |
| O | 4.308524  | 2.592201  | -0.882284 |
| O | 0.142559  | 5.845791  | 3.018485  |
| H | -5.771641 | 1.619027  | 0.766023  |
| H | -5.477426 | -0.848951 | 0.814667  |
| H | -3.284445 | -1.900228 | 0.391923  |
| H | -3.836954 | 3.119378  | 0.314387  |
| H | -1.753281 | 3.994111  | -0.657892 |
| H | -0.050417 | 3.665773  | -0.983554 |
| H | 1.791585  | 2.925209  | -0.283513 |
| H | -1.318651 | 4.009446  | 1.804616  |
| H | 0.402331  | 3.676453  | 1.519108  |
| H | 6.785469  | -0.637910 | -0.414451 |
| H | 5.896666  | 0.665538  | 0.416962  |
| H | 5.169379  | -0.965460 | 0.287832  |
| H | 5.118202  | -0.704038 | -2.247797 |
| H | 5.674819  | 0.986084  | -2.062505 |
| H | 0.560493  | 8.313379  | 2.368908  |
| H | 0.967449  | 7.807609  | 0.686828  |
| H | -0.721350 | 8.135325  | 1.120641  |
| H | 3.957555  | 3.439221  | -0.554336 |
| H | 1.494174  | -0.098551 | -0.913675 |
| H | 1.724975  | -2.376583 | -0.499368 |
| C | 1.122674  | -2.054227 | 0.352247  |
| C | 1.849637  | -1.714565 | 1.528110  |
| O | 1.051302  | -1.271678 | 2.564021  |
| C | 1.697082  | -0.981759 | 3.803794  |
| C | 0.653628  | -0.455541 | 4.771120  |
| H | 1.121294  | -0.218528 | 5.740126  |
| H | -0.137994 | -1.202476 | 4.944410  |
| H | 0.182785  | 0.461561  | 4.381660  |
| H | 2.179552  | -1.894558 | 4.196233  |
| H | 2.501798  | -0.244448 | 3.641034  |
| O | 3.074509  | -1.788236 | 1.685973  |

|   |           |           |           |
|---|-----------|-----------|-----------|
| C | -0.293914 | -1.979734 | 0.234768  |
| H | -0.813209 | -2.020828 | 1.197375  |
| C | -0.935065 | -2.870697 | -0.774251 |
| N | -1.802711 | -3.860423 | -0.326066 |
| H | -2.008147 | -4.045938 | 0.649224  |
| C | -2.242103 | -4.614410 | -1.387303 |
| C | -3.107824 | -5.717418 | -1.431175 |
| H | -3.552380 | -6.122985 | -0.518378 |
| C | -3.382432 | -6.274800 | -2.680277 |
| H | -4.054645 | -7.134828 | -2.748342 |
| C | -2.807800 | -5.746739 | -3.859561 |
| C | -1.945098 | -4.652800 | -3.811992 |
| H | -1.504142 | -4.255161 | -4.730768 |
| H | -3.045068 | -6.207911 | -4.822547 |
| C | -1.645974 | -4.068842 | -2.563264 |
| C | -0.815930 | -2.961701 | -2.152972 |
| C | -0.009245 | -2.100835 | -3.078358 |
| H | 0.434697  | -1.243384 | -2.556923 |
| H | -0.629568 | -1.706229 | -3.902042 |
| H | 0.814718  | -2.667930 | -3.547654 |

## 16. 1c-IM1

Energy = -1760.368897.

---

### CARTESIAN COORDINATES (ANGSTROMS)

---

|   |           |           |           |
|---|-----------|-----------|-----------|
| C | -4.370153 | 2.520241  | -0.917281 |
| C | -4.671326 | 1.150090  | -0.765666 |
| C | -3.601072 | 0.222756  | -0.590785 |
| C | -2.257620 | 0.630197  | -0.561320 |
| C | -1.992414 | 1.990072  | -0.712327 |
| C | -3.038332 | 2.926918  | -0.889192 |
| C | -5.903407 | 0.398848  | -0.741982 |
| C | -5.543056 | -0.927266 | -0.560251 |
| N | -4.161830 | -1.024587 | -0.473996 |
| C | -6.369726 | -2.179199 | -0.432041 |
| N | -7.339983 | -2.387605 | -1.507102 |
| C | -8.551602 | -2.900170 | -1.092795 |
| C | -8.556876 | -3.084127 | 0.404738  |
| C | -7.295028 | -2.225210 | 0.822627  |
| C | -9.366530 | -3.151955 | -2.178929 |
| C | -8.581068 | -2.787971 | -3.341420 |
| C | -7.305259 | -2.323651 | -2.882360 |

|   |            |           |           |
|---|------------|-----------|-----------|
| C | -8.834939  | -2.809528 | -4.727960 |
| C | -7.838541  | -2.391875 | -5.609148 |
| C | -6.582946  | -1.950038 | -5.134390 |
| C | -6.299372  | -1.908889 | -3.769020 |
| C | -10.758102 | -3.721606 | -2.179510 |
| C | -10.776971 | -5.238708 | -2.346140 |
| O | -12.155998 | -5.656425 | -2.367771 |
| C | -12.409086 | -6.972690 | -2.449511 |
| C | -13.891508 | -7.247504 | -2.467683 |
| C | -6.671125  | -2.756086 | 2.095629  |
| O | -5.761030  | -3.711644 | 1.873091  |
| C | -5.138242  | -4.331094 | 3.022776  |
| C | -4.045504  | -5.253206 | 2.525882  |
| C | -9.823368  | -2.694875 | 1.107459  |
| C | -10.407196 | -3.427804 | 2.074525  |
| O | -9.978437  | -4.667721 | 2.409896  |
| C | -9.632752  | -4.894740 | 3.797359  |
| C | -9.081630  | -6.298951 | 3.921091  |
| C | -7.276071  | 0.986613  | -0.896554 |
| O | -7.003180  | -2.392933 | 3.204386  |
| O | -11.471777 | -2.956803 | 2.769700  |
| O | -11.537508 | -7.812855 | -2.502321 |
| H | -8.027179  | -2.409138 | -6.686263 |
| H | -5.818060  | -1.634880 | -5.849600 |
| H | -5.328172  | -1.569252 | -3.404002 |
| H | -9.800068  | -3.155817 | -5.109085 |
| H | -11.271939 | -3.471068 | -1.238027 |
| H | -11.348908 | -3.276013 | -2.997755 |
| H | -5.678303  | -3.037618 | -0.401220 |
| H | -7.643192  | -1.208849 | 1.050477  |
| H | -8.341491  | -4.143318 | 0.627886  |
| H | -10.295494 | -1.745629 | 0.842360  |
| H | -10.289258 | -5.552507 | -3.283166 |
| H | -10.258491 | -5.741326 | -1.514114 |
| H | -3.651643  | -1.889630 | -0.335004 |
| H | -1.450471  | -0.094447 | -0.425024 |
| H | -0.956427  | 2.339953  | -0.694043 |
| H | -2.792344  | 3.986219  | -1.004700 |
| H | -5.171027  | 3.252632  | -1.053717 |
| H | -3.558979  | -5.742601 | 3.384137  |
| H | -4.455097  | -6.036960 | 1.869341  |
| H | -3.278270  | -4.693246 | 1.968149  |
| H | -4.745565  | -3.538476 | 3.678220  |
| H | -5.912293  | -4.878045 | 3.584839  |

|   |            |           |           |
|---|------------|-----------|-----------|
| H | -8.828892  | -6.508096 | 4.972416  |
| H | -9.824165  | -7.041889 | 3.589114  |
| H | -8.170325  | -6.419670 | 3.314271  |
| H | -8.886280  | -4.139563 | 4.097847  |
| H | -10.526500 | -4.765014 | 4.430260  |
| H | -14.070200 | -8.328880 | -2.510658 |
| H | -14.363164 | -6.821859 | -1.568152 |
| H | -14.349941 | -6.756710 | -3.340811 |
| H | -8.060227  | 0.217738  | -0.923633 |
| H | -7.514010  | 1.678378  | -0.069321 |
| H | -7.354902  | 1.570951  | -1.829657 |
| H | -12.030660 | -3.700212 | 3.050635  |

### 17. 1c-TS2

Energy = -1760.300090.

Imaginary Frequency = -2047.64

-----  
 CARTESIAN COORDINATES (ANGSTROMS)  
 -----

|   |            |           |           |
|---|------------|-----------|-----------|
| C | -6.330905  | -1.802690 | -3.833126 |
| C | -7.316651  | -2.247336 | -2.938330 |
| C | -8.593976  | -2.717731 | -3.384784 |
| C | -8.871238  | -2.715300 | -4.767011 |
| C | -7.894854  | -2.268831 | -5.656526 |
| C | -6.636849  | -1.820916 | -5.194187 |
| N | -7.327825  | -2.339826 | -1.564568 |
| C | -8.526033  | -2.877689 | -1.137980 |
| C | -9.355582  | -3.115808 | -2.217317 |
| C | -8.485149  | -3.106072 | 0.355265  |
| C | -7.244867  | -2.220647 | 0.763395  |
| C | -6.338137  | -2.150096 | -0.505434 |
| C | -5.513318  | -0.896589 | -0.622760 |
| C | -5.874760  | 0.431725  | -0.784807 |
| C | -4.643236  | 1.184153  | -0.798307 |
| C | -3.572265  | 0.255294  | -0.636462 |
| N | -4.131955  | -0.994044 | -0.537323 |
| C | -2.229144  | 0.663177  | -0.601043 |
| C | -1.964927  | 2.025316  | -0.732085 |
| C | -3.011535  | 2.963832  | -0.895364 |
| C | -4.343061  | 2.556603  | -0.929688 |
| C | -7.248195  | 1.020460  | -0.927523 |
| C | -9.764004  | -2.814969 | 1.105609  |
| C | -10.175184 | -3.549425 | 2.265404  |

|   |            |           |           |
|---|------------|-----------|-----------|
| O | -11.458700 | -3.509647 | 2.384745  |
| C | -6.548766  | -2.713618 | 2.014594  |
| O | -6.652704  | -2.190088 | 3.102393  |
| C | -10.738631 | -3.705996 | -2.221651 |
| C | -10.733798 | -5.222531 | -2.393084 |
| O | -12.106230 | -5.661190 | -2.428700 |
| C | -12.339413 | -6.980083 | -2.524338 |
| O | -11.455512 | -7.807620 | -2.573242 |
| C | -13.817389 | -7.275772 | -2.565404 |
| O | -5.826922  | -3.820103 | 1.792189  |
| C | -5.156560  | -4.422043 | 2.922990  |
| C | -4.396729  | -5.633926 | 2.428267  |
| O | -9.419437  | -4.262674 | 3.051686  |
| C | -10.057051 | -5.139435 | 4.031742  |
| C | -8.977581  | -5.956409 | 4.702843  |
| H | -8.101341  | -2.268009 | -6.730509 |
| H | -5.887793  | -1.482966 | -5.915727 |
| H | -5.357763  | -1.458534 | -3.477766 |
| H | -9.838289  | -3.066231 | -5.138884 |
| H | -11.256369 | -3.465024 | -1.280387 |
| H | -11.332385 | -3.267819 | -3.041674 |
| H | -5.646355  | -3.009937 | -0.499772 |
| H | -7.611140  | -1.211154 | 0.992979  |
| H | -8.212896  | -4.164511 | 0.524217  |
| H | -9.998917  | -1.745888 | 1.226144  |
| H | -10.233388 | -5.526226 | -3.326785 |
| H | -10.214884 | -5.720686 | -1.558485 |
| H | -3.620698  | -1.860633 | -0.412407 |
| H | -1.421525  | -0.062790 | -0.474920 |
| H | -0.929222  | 2.375688  | -0.708378 |
| H | -2.766366  | 4.024920  | -0.995076 |
| H | -5.144485  | 3.290328  | -1.055325 |
| H | -3.877384  | -6.113363 | 3.272814  |
| H | -5.078854  | -6.372681 | 1.978563  |
| H | -3.643247  | -5.349328 | 1.676946  |
| H | -4.489028  | -3.671722 | 3.375511  |
| H | -5.916070  | -4.689501 | 3.674368  |
| H | -9.442643  | -6.640463 | 5.429727  |
| H | -8.421088  | -6.559004 | 3.968215  |
| H | -8.270090  | -5.308921 | 5.243745  |
| H | -10.599857 | -4.505153 | 4.747738  |
| H | -10.789177 | -5.763633 | 3.496878  |
| H | -13.980324 | -8.359987 | -2.598520 |
| H | -14.312430 | -6.844804 | -1.681272 |

|   |            |           |           |
|---|------------|-----------|-----------|
| H | -14.265238 | -6.803188 | -3.454098 |
| H | -8.031765  | 0.251220  | -0.957517 |
| H | -7.481942  | 1.704435  | -0.092663 |
| H | -7.332021  | 1.613422  | -1.854756 |
| H | -11.261773 | -3.072544 | 1.220044  |

### 18. 4g

Energy = -1760.411631.

-----  
CARTESIAN COORDINATES (ANGSTROMS)  
-----

|   |           |           |           |
|---|-----------|-----------|-----------|
| C | -4.630114 | 2.596615  | -0.669676 |
| C | -4.872802 | 1.205713  | -0.605421 |
| C | -3.824541 | 0.292980  | -0.490342 |
| C | -2.519230 | 0.806494  | -0.438141 |
| C | -2.250269 | 2.211762  | -0.485416 |
| C | -3.333737 | 3.105246  | -0.610512 |
| N | -1.296890 | 0.179184  | -0.341904 |
| C | -0.289412 | 1.120629  | -0.284419 |
| C | -0.815866 | 2.394844  | -0.383447 |
| C | -0.100368 | 3.717335  | -0.335125 |
| C | -0.870491 | -1.189868 | -0.069006 |
| C | 0.682384  | -1.075589 | -0.243357 |
| C | 1.041077  | 0.443574  | -0.071959 |
| C | 2.148359  | 0.914998  | -1.034513 |
| C | -0.046626 | 4.303107  | 1.074090  |
| C | -1.521240 | -2.241415 | -0.927847 |
| N | -2.103765 | -3.340858 | -0.314555 |
| C | -2.608765 | -4.189071 | -1.268031 |
| C | -2.341059 | -3.599865 | -2.539657 |
| C | -1.644790 | -2.357979 | -2.303411 |
| C | -3.277745 | -5.416992 | -1.139606 |
| C | -3.682375 | -6.056040 | -2.309934 |
| C | -3.428369 | -5.489257 | -3.581703 |
| C | -2.763937 | -4.271599 | -3.706330 |
| C | 1.467260  | -1.986231 | 0.687105  |
| O | 2.351211  | -2.730804 | 0.321624  |
| O | 1.083956  | -1.858885 | 1.961461  |
| C | 1.098728  | -2.419027 | 4.292245  |
| C | 1.767627  | -2.658772 | 2.956070  |
| C | 3.461861  | 0.172087  | -0.891361 |
| O | 4.057252  | -0.354038 | -1.805114 |

|   |           |           |           |
|---|-----------|-----------|-----------|
| O | 3.901717  | 0.177115  | 0.374881  |
| C | 5.500943  | -0.268793 | 2.102730  |
| C | 5.136433  | -0.521828 | 0.655558  |
| O | 0.633429  | 5.570221  | 0.994005  |
| O | 0.434655  | 5.851433  | 3.214452  |
| C | 0.814416  | 6.253647  | 2.136672  |
| C | 1.536455  | 7.554117  | 1.891835  |
| C | -1.172384 | -1.413988 | -3.370698 |
| H | -5.476224 | 3.283037  | -0.763860 |
| H | -5.901361 | 0.836810  | -0.647277 |
| H | -4.013414 | -0.781089 | -0.440560 |
| H | -3.160852 | 4.184374  | -0.654568 |
| H | 0.930895  | 3.622685  | -0.709307 |
| H | -0.607212 | 4.443163  | -0.993101 |
| H | -1.094429 | -1.428875 | 0.984589  |
| H | 0.944537  | -1.387114 | -1.263276 |
| H | 1.377616  | 0.625198  | 0.962484  |
| H | 2.357999  | 1.980796  | -0.845954 |
| H | 1.824077  | 0.813995  | -2.079568 |
| H | -1.056001 | 4.458527  | 1.487612  |
| H | 0.498905  | 3.640768  | 1.765262  |
| H | -2.143249 | -3.490551 | 0.687455  |
| H | -3.473055 | -5.853690 | -0.156689 |
| H | -4.206094 | -7.013873 | -2.244503 |
| H | -3.759870 | -6.020059 | -4.478533 |
| H | -2.571256 | -3.843329 | -4.694168 |
| H | 1.607364  | -3.011266 | 5.068984  |
| H | 1.152905  | -1.356744 | 4.577981  |
| H | 0.040237  | -2.722430 | 4.265918  |
| H | 1.716048  | -3.715203 | 2.650026  |
| H | 2.829154  | -2.364479 | 2.967628  |
| H | 6.443881  | -0.785323 | 2.341511  |
| H | 5.638538  | 0.807240  | 2.293466  |
| H | 4.720220  | -0.647577 | 2.781112  |
| H | 4.977484  | -1.592474 | 0.450546  |
| H | 5.912346  | -0.156628 | -0.034988 |
| H | 1.682252  | 8.084285  | 2.840934  |
| H | 2.510028  | 7.358097  | 1.415831  |
| H | 0.953030  | 8.179562  | 1.197851  |
| H | -0.755397 | -0.487032 | -2.953880 |
| H | -0.394316 | -1.876557 | -4.003251 |
| H | -1.999787 | -1.131048 | -4.044099 |
